# Supplementary material for: Structural Differences between Human Proteins and Aero- and Microbial Allergens Define Allergenicity
Source: PLoS One. 2012 Jul 18;7(7):e40552. doi: 10.1371/journal.pone.0040552 (PMC3399830; doi:10.1371/journal.pone.0040552)
Supplement: Table S1 — List of all allergens and the respective homologous proteins in the microbes and human genomes. (XLSX) [file pone.0040552.s002.xlsx]

## Sheet: Sheet1
Table S1: List of all allergens and the respective homologous proteins in the microbes and human genomes
	Allergen Family (AllFam)		Allergen information							Brugia malayi			Loa loa			Wuchereria bancrofti			Schistosoma mansoni			Plasmodium falciparum			Trypanosoma cruzi			Leishmania major			Toxoplasma gondii			Escherichia coli			Listeria monocytogenes			Staphylococcus aureus			Mycobacterium tuberculosis			Candida albicans			Histoplasma capsulatum
	Code	AllFam Name	ACC#	Allergen Name	Seq size	Realm	Major allergen	IgE Prevalence (%)	PMID Link	Match	E value	% identity	Match	E value	% identity	Match	E value	% identity	Match	E value	% identity	Match	E value	% identity	Match	E value	% identity	Match	E value	% identity	Match	E value	% identity	Match	E value	% identity	Match	E value	% identity	Match	E value	% identity	Match	E value	% identity	Match	E value	% identity	Match
	AF001	Helix-loop-helix DNA-binding domain	Q8J1X7	Fus c 3	450	F	no	15	12695122	Bm1_50600	0.001	0	LOAG_13271T0	6e-07	26	WUBG_03748T0	0.02	0	Smp_134560	0.002	0	psu|PFD0080c	2e-05	0	Tc00.1047053510787.10	1e-05	0	psu|LmjF35.0520	6e-10	22	gb|TGME49_061990	3e-07	21	ECCG_03539T0	0.0001	0	gi|16803980	0.055	0	SAAG_00476T0	0.0004	0	TBCT_02428.1	0.21	0	CAWT_04461	3e-09	20	HCAG_01471T0
	AF002	Heat shock protein Hsp70	P78983	Alt a 3	152	F	no	5	9693275	Bm1_43675	2e-51	63	LOAG_03166T0	2e-52	64	WUBG_02802T0	7e-51	62	Smp_182190.2	2e-37	52	psu|PF08_0054	3e-42	52	Tc00.1047053511211.160	5e-46	56	psu|LmjF28.2780	3e-47	59	gb|TGME49_073760	1e-41	50	ECCG_01131T0	0.001	0	gi|16803513	6e-05	0	SAAG_01494T0	1e-05	0	TBCT_00345.1	7e-08	28	CAWT_00103	1e-50	63	HCAG_01398T0
	AF002	Heat shock protein Hsp70	P40918	Cla h HSP70	643	F	no	38	8789547	Bm1_43675	0	76	LOAG_03166T0	0	76	WUBG_02802T0	0	76	Smp_182190.2	0	71	psu|PF08_0054	0	68	Tc00.1047053511211.170	0	71	psu|LmjF28.2780	0	72	gb|TGME49_073760	0	67	ECCG_03000T0	1e-150	48	gi|16803513	1e-143	45	SAAG_01494T0	1e-143	45	TBCT_00345.1	1e-146	46	CAWT_00103	0	78	HCAG_05805T0
	AF002	Heat shock protein Hsp70	Q92260	Pen c 19	503	F	no	41	9208190	Bm1_43675	0	79	LOAG_03166T0	0	79	WUBG_02804T0	0	77	Smp_182190.2	0	73	psu|MAL7P1.228	0	67	Tc00.1047053511211.170	0	72	psu|LmjF28.2780	0	73	gb|TGME49_073760	0	72	ECCG_03000T0	1e-125	47	gi|16803513	1e-130	47	SAAG_01494T0	1e-127	46	TBCT_00345.1	1e-130	49	CAWT_00103	0	81	HCAG_05805T0
	AF003	Animal Kunitz serine protease inhihibitor	Q7Z1K3	Ani s 1	194	A	yes	85	10887322	Bm1_29560	2e-12	33	LOAG_14750T0	8e-35	42	WUBG_10764T0	2e-19	42	Smp_052230	3e-07	34	psu|PF10_0406	2.3	0	Tc00.1047053508101.9	3.6	0	psu|LmjF34.0460	1.3	0	gb|TGME49_019220	0.22	0	ECCG_03264T0	3.6	0	gi|16804191	1	0	SAAG_02404T0	2.6	0	TBCT_03591.1	0.58	0	CAWT_03461	4.4	0	HCAG_04331T0
	AF004	Eukaryotic aspartyl protease	P54958	Bla g 2	352	A	yes	57	7642642	Bm1_12055	3e-14	33	LOAG_13316T0	1e-27	28	WUBG_14986T0	1e-14	31	Smp_013040.2	4e-31	29	psu|PF14_0076	5e-20	27	Tc00.1047053506249.20	12	0	psu|LmjF08.0380	0.36	0	gb|TGME49_062940	2e-17	25	ECCG_00384T0	2.2	0	gi|16804752	0.46	0	SAAG_00661T0	2	0	TBCT_03132.1	2.9	0	CAWT_05836	7e-22	26	HCAG_00037T0
	AF005	Cystatin	Q8WNR9	Fel d 3	98	A	NA			Bm1_56600	0.0001	0	LOAG_09834T0	0.0001	0	WUBG_06419T0	7e-05	0	Smp_006390	1e-09	31	psu|PF11_0303	0.011	0	Tc00.1047053511255.190	5.5	0	psu|LmjF29.0680	1.3	0	gb|TGME49_050720	1.1	0	ECCG_02308T0	0.82	0	gi|16802135	0.099	0	SAAG_01879T0	0.006	0	TBCT_02677.1	1.4	0	CAWT_00555	0.14	0	HCAG_01998T0
	AF006	Cytochrome c	Q96VP3	Cur l 3	108	F	yes	60	18186808	Bm1_28235	2e-33	57	LOAG_05968T0	7e-33	56	WUBG_13819T0	1e-14	65	Smp_033400	2e-37	62	psu|PF14_0038	1e-30	58	Tc00.1047053508959.4	5e-30	55	psu|LmjF16.1320	1e-27	50	gb|TGME49_019750	4e-29	57	ECCG_00007T0	0.084	0	gi|16804793	1.4	0	SAAG_02471T0	0.14	0	TBCT_02141.1	0.44	0	CAWT_06082	2e-43	70	HCAG_05938T0
	AF007	EF hand domain	O81701	Aln g 4	85	P	no	18	9862740	Bm1_50415	1e-09	43	LOAG_01388T0	1e-09	43	WUBG_02494T0	8e-09	42	Smp_026560.2	1e-08	43	psu|PF14_0323	7e-10	44	Tc00.1047053506391.20	2e-08	42	psu|LmjF09.0930	1e-08	42	gb|TGME49_049240	2e-09	43	ECCG_03537T0	0.27	0	gi|16803175	0.82	0	SAAG_00932T0	0.089	0	TBCT_00152.1	0.48	0	CAWT_03222	2e-10	48	HCAG_01325T0
	AF007	EF hand domain	P43187	Bet v 3	205	P	no	10	7520389	Bm1_43315	9e-15	27	LOAG_01388T0	2e-14	31	WUBG_03355T0	2e-14	31	Smp_026560.2	1e-15	33	psu|PF14_0323	2e-16	33	Tc00.1047053506391.20	7e-16	32	psu|LmjF09.0930	4e-16	32	gb|TGME49_049240	2e-15	33	ECCG_02478T0	1	0	gi|16803956	0.38	0	SAAG_01233T0	0.052	0	TBCT_03430.1	0.17	0	CAWT_03222	9e-15	31	HCAG_01325T0
	AF007	EF hand domain	Q39419	Bet v 4	85	P	no	10	20962532	Bm1_50415	1e-08	42	LOAG_09259T0	2e-08	42	WUBG_02494T0	1e-08	42	Smp_026560.2	2e-07	42	psu|PF14_0323	8e-09	43	Tc00.1047053507483.50	2e-08	46	psu|LmjF09.0930	1e-08	46	gb|TGME49_049240	2e-08	42	ECCG_01020T0	0.055	0	gi|16802488	0.13	0	SAAG_01199T0	0.089	0	TBCT_00152.1	1.1	0	CAWT_03222	4e-10	52	HCAG_01325T0
	AF007	EF hand domain	Q1A7B1	Bla g 6	154	A	no	14	16751002	Bm1_43315	7e-47	58	LOAG_10355T0	9e-43	52	WUBG_00838T0	5e-42	56	Smp_026560.2	5e-32	44	psu|PF14_0323	7e-30	40	Tc00.1047053506391.20	2e-31	43	psu|LmjF09.0930	9e-32	43	gb|TGME49_049240	3e-30	41	ECCG_03004T0	0.49	0	gi|16803495	0.008	0	SAAG_01411T0	0.033	0	TBCT_01018.1	2	0	CAWT_03222	2e-24	34	HCAG_01325T0
	AF007	EF hand domain	A0ERA8	Bla g 8	195	A	NA			Bm1_45035	3e-27	41	LOAG_01452T0	1e-27	36	WUBG_06212T0	8e-25	34	Smp_132680	7e-29	39	psu|PF14_0323	4e-20	35	Tc00.1047053506391.20	1e-19	35	psu|LmjF09.0930	7e-20	35	gb|TGME49_049240	1e-20	36	ECCG_01131T0	0.33	0	gi|16803980	0.46	0	SAAG_01411T0	0.7	0	TBCT_02162.1	0.031	0	CAWT_03222	3e-19	36	HCAG_01325T0
	AF007	EF hand domain	Q84V36	Che a 3	86	P	no	46	15208604	Bm1_50415	9e-10	42	LOAG_01388T0	1e-09	42	WUBG_02494T0	6e-09	42	Smp_026560.2	1e-08	42	psu|PF14_0323	5e-10	43	Tc00.1047053511825.40	2e-09	42	psu|LmjF22.1410	3e-09	41	gb|TGME49_049240	1e-09	42	ECCG_01020T0	0.094	0	gi|16802982	0.074	0	SAAG_01199T0	0.12	0	TBCT_01024.1	0.48	0	CAWT_03222	7e-09	42	HCAG_01325T0
	AF007	EF hand domain	P94092	Cyn d 7	80	P	no	10	9363908	Bm1_36880	6e-10	46	LOAG_01388T0	2e-08	41	WUBG_04093T0	4e-09	46	Smp_026560.2	2e-07	41	psu|PF14_0323	4e-09	45	Tc00.1047053511825.40	7e-08	49	psu|LmjF09.0930	4e-08	41	gb|TGME49_047230	1e-08	41	ECCG_03000T0	0.62	0	gi|16804567	0.49	0	SAAG_00772T0	0.74	0	TBCT_03319.1	0.37	0	CAWT_03222	8e-10	45	HCAG_01325T0
	AF007	EF hand domain	Q8UUS3	Cyp c 1	109	A	yes	76	18504705	Bm1_50415	2e-06	0	LOAG_01388T0	2e-06	0	WUBG_03355T0	2e-06	0	Smp_026560.2	4e-07	31	psu|PF14_0323	3e-07	30	Tc00.1047053507483.50	6e-08	31	psu|LmjF09.0930	3e-08	31	gb|TGME49_049240	1e-07	28	ECCG_00502T0	0.92	0	gi|16802583	1.3	0	SAAG_01985T0	0.42	0	TBCT_00365.1	0.76	0	CAWT_03222	4e-06	0	HCAG_01325T0
	AF007	EF hand domain	P02622	Gad c 1	113	A	yes	100	9449503	Bm1_36880	2e-05	0	LOAG_04699T0	4e-05	0	WUBG_04093T0	1e-05	0	Smp_026560.2	4e-05	0	psu|PF14_0323	1e-05	0	Tc00.1047053507483.50	2e-06	0	psu|LmjF09.0930	1e-06	0	gb|TGME49_049240	1e-05	0	ECCG_04325T0	1	0	gi|16802686	0.13	0	SAAG_02375T0	0.78	0	TBCT_00513.1	0.22	0	CAWT_04882	3e-05	0	HCAG_01325T0
	AF007	EF hand domain	B7SNI3	Lit v 3	177	A	yes	55	18760458	Bm1_45035	1e-25	35	LOAG_01452T0	6e-25	35	WUBG_06212T0	4e-22	32	Smp_132680	2e-25	37	psu|PF14_0323	3e-18	31	Tc00.1047053506391.20	2e-16	30	psu|LmjF09.0930	1e-16	30	gb|TGME49_049240	1e-17	32	ECCG_01015T0	0.83	0	gi|16802308	1.2	0	SAAG_01466T0	1	0	TBCT_02851.1	1.1	0	CAWT_03222	3e-16	30	HCAG_01325T0
	AF007	EF hand domain	O81092	Ole e 3	84	P	no	39	18849614	Bm1_50415	1e-10	44	LOAG_01388T0	2e-10	44	WUBG_02494T0	3e-09	44	Smp_026560.2	2e-09	44	psu|PF14_0323	8e-11	45	Tc00.1047053506391.20	2e-09	42	psu|LmjF09.0930	9e-10	42	gb|TGME49_049240	2e-10	44	ECCG_03100T0	0.16	0	gi|16803175	0.37	0	SAAG_01867T0	0.19	0	TBCT_00152.1	1.1	0	CAWT_03222	2e-09	42	HCAG_01325T0
	AF007	EF hand domain	B6UD40	Ole e 8	222	P	no	8	12372128	Bm1_43315	2e-10	38	LOAG_03379T0	9e-09	40	WUBG_03355T0	7e-09	45	Smp_026560.2	2e-09	45	psu|PF14_0323	1e-10	50	Tc00.1047053507483.50	3e-10	47	psu|LmjF09.0930	2e-10	47	gb|TGME49_049240	1e-10	50	ECCG_00874T0	0.31	0	gi|16803839	0.33	0	SAAG_00452T0	0.49	0	TBCT_03278.1	0.017	0	CAWT_03222	3e-07	44	HCAG_01325T0
	AF007	EF hand domain	Q1M0Y3	Per a 6	151	A	no	16	18402291	Bm1_43315	7e-44	50	LOAG_10355T0	3e-39	48	WUBG_00838T0	6e-39	49	Smp_026560.2	6e-33	42	psu|PF14_0323	8e-33	43	Tc00.1047053506391.20	2e-33	44	psu|LmjF09.0930	9e-34	44	gb|TGME49_049240	3e-32	42	ECCG_02858T0	1.1	0	gi|16803495	0.062	0	SAAG_01199T0	0.21	0	TBCT_02545.1	1.5	0	CAWT_03222	1e-26	35	HCAG_01325T0
	AF007	EF hand domain	O82040	Phl p 7	78	P	no	7	12534548	Bm1_36880	7e-10	44	LOAG_01388T0	2e-08	41	WUBG_04093T0	5e-09	43	Smp_026560.2	2e-07	41	psu|PF14_0323	4e-09	45	Tc00.1047053506391.20	7e-08	41	psu|LmjF09.0930	4e-08	41	gb|TGME49_047230	9e-09	41	ECCG_02025T0	0.35	0	gi|16804567	0.49	0	SAAG_01266T0	1.3	0	TBCT_03319.1	0.12	0	CAWT_03222	2e-09	45	HCAG_01325T0
	AF007	EF hand domain	Q8JIU2	Ran e 1	110	A	NA			Bm1_36880	1e-05	0	LOAG_11422T0	1e-07	32	WUBG_15075T0	2e-06	0	Smp_026560.2	6e-06	0	psu|PF14_0323	7e-06	0	Tc00.1047053507483.50	3e-07	37	psu|LmjF09.0930	2e-07	37	gb|TGME49_049240	1e-06	0	ECCG_01896T0	0.25	0	gi|16803276	2.4	0	SAAG_00538T0	0.15	0	TBCT_00281.1	2.3	0	CAWT_04882	3e-05	0	HCAG_01325T0
	AF007	EF hand domain	Q91482	Sal s 1	109	A	yes	63	8845026	Bm1_50415	4e-07	33	LOAG_01388T0	5e-07	33	WUBG_03355T0	4e-07	33	Smp_026560.2	3e-07	33	psu|PF14_0323	6e-07	29	Tc00.1047053507483.50	5e-09	37	psu|LmjF09.0930	3e-09	37	gb|TGME49_049240	4e-08	34	ECCG_03059T0	0.41	0	gi|16802692	2.3	0	SAAG_01519T0	1.6	0	TBCT_02222.1	2.2	0	CAWT_03222	2e-05	0	HCAG_01325T0
	AF007	EF hand domain	B3WFF7	Sar sa 1	109	A	yes	80	19616851	Bm1_50415	1e-05	0	LOAG_01388T0	1e-05	0	WUBG_03355T0	1e-05	0	Smp_026560.2	5e-06	0	psu|PF14_0323	1e-05	0	Tc00.1047053507483.50	5e-07	39	psu|LmjF09.0930	3e-07	39	gb|TGME49_049240	3e-06	0	ECCG_04313T0	2.1	0	gi|16802414	0.61	0	SAAG_01091T0	0.25	0	TBCT_01773.1	0.45	0	CAWT_03222	5e-05	0	HCAG_01325T0
	AF007	EF hand domain	P59747	Sco j 1	109	A	NA		12842183	Bm1_50415	1e-06	0	LOAG_11422T0	5e-07	29	WUBG_03355T0	1e-06	0	Smp_026560.2	2e-07	31	psu|PF14_0323	5e-07	30	Tc00.1047053507483.50	7e-08	36	psu|LmjF09.0930	4e-08	36	gb|TGME49_049240	1e-07	32	ECCG_04015T0	1.6	0	gi|16804201	1.8	0	SAAG_01091T0	0.55	0	TBCT_02194.1	3.8	0	CAWT_03222	6e-07	31	HCAG_01325T0
	AF007	EF hand domain	P58171	Syr v 3	81	P	NA			Bm1_50415	1e-10	45	LOAG_05001T0	2e-10	37	WUBG_02494T0	6e-09	45	Smp_026560.2	2e-09	45	psu|PF14_0323	7e-11	46	Tc00.1047053506391.20	1e-09	43	psu|LmjF09.0930	7e-10	43	gb|TGME49_049240	2e-10	45	ECCG_03100T0	0.13	0	gi|16803175	0.22	0	SAAG_01867T0	0.066	0	TBCT_01652.1	1.4	0	CAWT_03222	4e-09	41	HCAG_01325T0
	AF007	EF hand domain	Q90YK8	The c 1	109	A	NA			Bm1_50415	2e-05	0	LOAG_11422T0	7e-06	0	WUBG_15075T0	6e-06	0	Smp_026560.2	2e-06	0	psu|PF14_0323	8e-07	37	Tc00.1047053507483.50	2e-07	39	psu|LmjF09.0930	9e-08	39	gb|TGME49_049240	1e-06	0	ECCG_03294T0	2.1	0	gi|16803500	1.3	0	SAAG_01893T0	1.2	0	TBCT_00768.1	1	0	CAWT_04882	0.0003	0	HCAG_01325T0
	AF008	Intermediate filament protein	P02538	Hom s 5	564	A	NA			Bm1_45215	2e-33	25	LOAG_02841T0	3e-37	25	WUBG_03860T0	1e-32	24	Smp_159900.2	5e-24	22	psu|PFL1960w	5e-13	47	Tc00.1047053511253.31	1e-11	23	psu|LmjF03.0270	3e-12	23	gb|TGME49_036540	5e-13	39	ECCG_04021T0	0.006	0	gi|16804542	6e-07	23	SAAG_01832T0	5e-07	20	TBCT_00124.1	3e-11	39	CAWT_03286	3e-10	21	HCAG_04221T0
	AF009	globin	P02192	Bos d Myoglobin	154	A	no	1	14982516	Bm1_39630	0.78	0	LOAG_09598T0	7e-05	0	WUBG_02254T0	0.061	0	Smp_131230	35	0	psu|PF14_0591	0.14	0	Tc00.1047053511109.70	0.36	0	psu|LmjF27.0880	4.1	0	gb|TGME49_112270	2.7	0	ECCG_01346T0	0.015	0	gi|16802060	1.2	0	SAAG_01544T0	0.37	0	TBCT_00897.1	3.4	0	CAWT_00464	0.26	0	HCAG_00012T0
	AF009	globin	P02221	Chi t 2	158	A	yes	88	1701849	Bm1_52690	0.82	0	LOAG_00262T0	5.7	0	WUBG_07167T0	1.2	0	Smp_150270	9.7	0	psu|PFF1470c	2.7	0	Tc00.1047053510155.10	0.38	0	psu|LmjF20.0140	0.079	0	gb|TGME49_035920	0.58	0	ECCG_00239T0	0.68	0	gi|16802497	0.086	0	SAAG_02043T0	0.059	0	TBCT_03591.1	3.5	0	CAWT_05862	0.36	0	HCAG_09862T0
	AF009	globin	P02222	Chi t 3	160	A	yes	88	1701849	Bm1_39025	0.49	0	LOAG_07921T0	3.4	0	WUBG_13895T0	0.74	0	Smp_028200.1	10	0	psu|PF14_0379	1.6	0	Tc00.1047053508355.170	0.87	0	psu|LmjF31.0600	0.4	0	gb|TGME49_012890	2.3	0	ECCG_01056T0	0.31	0	gi|16804491	0.75	0	SAAG_01329T0	0.18	0	TBCT_01753.1	0.56	0	CAWT_01779	3.1	0	HCAG_02930T0
	AF009	globin	P02231	Chi t 4	151	A	yes	88	1701849	Bm1_01080	1.7	0	LOAG_06894T0	0.61	0	WUBG_03096T0	3.3	0	Smp_173700	8.7	0	psu|PF11_0404	1.5	0	Tc00.1047053507011.250	1	0	psu|LmjF08.0030	0.46	0	gb|TGME49_112630	0.53	0	ECCG_00536T0	1.4	0	gi|16802218	0.89	0	SAAG_01476T0	1	0	TBCT_00378.1	0.004	0	CAWT_05697	0.74	0	HCAG_10350T0
	AF009	globin	P02224	Chi t 5	162	A	yes	88	1701849	Bm1_25895	1.5	0	LOAG_12877T0	1.6	0	WUBG_07647T0	2.2	0	Smp_164560	23	0	psu|PF13_0321	0.34	0	Tc00.1047053508897.50	4.4	0	psu|LmjF04.0690	1.2	0	gb|TGME49_104050	1.8	0	ECCG_02855T0	0.71	0	gi|16802051	0.15	0	SAAG_01494T0	0.89	0	TBCT_00345.1	0.25	0	CAWT_04941	1.4	0	HCAG_06532T0
	AF009	globin	P02226	Chi t 6	161	A	yes	88	1701849	Bm1_33755	0.85	0	LOAG_05057T0	1.2	0	WUBG_00378T0	0.44	0	Smp_133330	23	0	psu|PF10_0161a	8.2	0	Tc00.1047053511827.60	0.4	0	psu|LmjF06.0770	0.036	0	gb|TGME49_060150	3.9	0	ECCG_01104T0	0.049	0	gi|16802747	0.089	0	SAAG_01635T0	0.39	0	TBCT_01017.1	0.56	0	CAWT_02507	0.29	0	HCAG_03017T0
	AF009	globin	P12548	Chi t 7	161	A	yes	88	1701849	Bm1_50995	0.22	0	LOAG_12377T0	0.53	0	WUBG_10398T0	0.44	0	Smp_122910	10	0	psu|PF10_0400	2.8	0	Tc00.1047053511181.50	1.5	0	psu|LmjF34.2180	0.31	0	gb|TGME49_080410	0.025	0	ECCG_04024T0	0.54	0	gi|16802488	0.011	0	SAAG_00476T0	0.1	0	TBCT_00378.1	0.066	0	CAWT_02835	1.1	0	HCAG_09900T0
	AF009	globin	P02227	Chi t 8	151	A	yes	88	1701849	Bm1_32890	0.26	0	LOAG_14924T0	0.21	0	WUBG_11454T0	0.17	0	Smp_052990	0.12	0	psu|PFL1690w	2.5	0	Tc00.1047053508827.139	2.9	0	psu|LmjF25.2160	5.1	0	gb|TGME49_002250	2.6	0	ECCG_03262T0	1.8	0	gi|16804491	0.18	0	SAAG_00839T0	0.61	0	TBCT_01615.1	0.38	0	CAWT_05255	2.2	0	HCAG_00028T0
	AF009	globin	P02228	Chi t 9	151	A	yes	88	1701849	Bm1_25435	2.2	0	LOAG_12877T0	0.8	0	WUBG_04854T0	1.9	0	Smp_052990	0.21	0	psu|MAL13P1.308	2.5	0	Tc00.1047053508239.20	0.59	0	psu|LmjF20.1200	2.3	0	gb|TGME49_009770	10	0	ECCG_03939T0	2.4	0	gi|16803681	2	0	SAAG_02260T0	0.46	0	TBCT_01366.1	0.86	0	CAWT_02342	0.57	0	HCAG_04450T0
	AF010	Glutathione S-transferase	O18598	Bla g 5	204	A	yes	72	9252418	Bm1_33930	1e-19	29	LOAG_01321T0	1e-14	28	WUBG_12344T0	3e-15	27	Smp_054160	4e-17	27	psu|PF14_0187	4e-11	27	Tc00.1047053507839.40	3	0	psu|LmjF27.2590	5.2	0	gb|TGME49_085920	3.5	0	ECCG_02988T0	0.79	0	gi|16802510	0.17	0	SAAG_02136T0	0.43	0	TBCT_01710.1	3.1	0	CAWT_04351	1.6	0	HCAG_06775T0
	AF010	Glutathione S-transferase	P46419	Der p 8	219	A	no	9	19021722	Bm1_33930	7e-24	36	LOAG_01321T0	2e-20	32	WUBG_12344T0	1e-20	35	Smp_102070	4e-38	38	psu|PF14_0187	5e-13	24	Tc00.1047053503419.30	0.69	0	psu|LmjF22.1190	0.7	0	gb|TGME49_085920	4e-05	0	ECCG_02173T0	0.18	0	gi|16803925	1.2	0	SAAG_02534T0	1.8	0	TBCT_02655.1	7.7	0	CAWT_04163	0.16	0	HCAG_07955T0
	AF011	Eukaryotic elongation factor 1	Q69BZ7	Pen c 24	228	F	NA		15679724	Bm1_28320	2e-36	39	LOAG_02925T0	2e-38	41	WUBG_00435T0	2e-35	40	Smp_030690	8e-41	43	psu|PFI0645w	5e-16	26	Tc00.1047053507671.30	7e-31	36	psu|LmjF36.1430	6e-29	34	gb|TGME49_026410	2e-28	32	ECCG_03783T0	0.93	0	gi|16803931	0.98	0	SAAG_00178T0	0.06	0	TBCT_03378.1	0.087	0	CAWT_03362	9e-62	56	HCAG_01784T0
	AF012	Insulin family	P01317	Bos d Insulin	105	A	NA			Bm1_36800	0.072	0	LOAG_03919T0	0.19	0	WUBG_02288T0	0.076	0	Smp_159600	0.83	0	psu|PF14_0176	6.8	0	Tc00.1047053510173.10	1.1	0	psu|LmjF04.0860	0.07	0	gb|TGME49_007480	0.036	0	ECCG_04376T0	4.2	0	gi|16804791	3.6	0	SAAG_01948T0	7.4	0	TBCT_03842.1	1.2	0	CAWT_05027	2.1	0	HCAG_07207T0
	AF012	Insulin family	P01308	Hom s Insulin	110	A	no	5	8237718	Bm1_21195	1.4	0	LOAG_14488T0	0.91	0	WUBG_14635T0	0.49	0	Smp_044680	15	0	psu|PF14_0176	7.5	0	Tc00.1047053504431.109	0.29	0	psu|LmjF34.2640	0.28	0	gb|TGME49_011640	1.2	0	ECCG_01590T0	2.8	0	gi|16803660	1.1	0	SAAG_00943T0	6.2	0	TBCT_03405.1	3	0	CAWT_05027	1.8	0	HCAG_07352T0
	AF012	Insulin family	P01315	Sus s Insulin	108	A	NA			Bm1_46765	0.46	0	LOAG_14488T0	0.41	0	WUBG_14635T0	0.17	0	Smp_134650	12	0	psu|PF08_0142	4.3	0	Tc00.1047053510105.9	4.1	0	psu|LmjF34.2640	0.2	0	gb|TGME49_114030	0.14	0	ECCG_01590T0	1.6	0	gi|16804274	1.8	0	SAAG_01600T0	3.5	0	TBCT_01796.1	0.97	0	CAWT_05027	0.59	0	HCAG_10575T0
	AF013	Kazal-type serine protease inhibitor	P01005	Gal d 1	210	A	no	43	20633029	Bm1_43330	9e-10	24	LOAG_12970T0	4e-14	27	WUBG_07113T0	4e-15	25	Smp_155050	3e-10	28	psu|PFA0155c	0.53	0	Tc00.1047053511527.34	5.4	0	psu|LmjF31.1400	4.2	0	gb|TGME49_059890	6e-17	27	ECCG_03941T0	12	0	gi|16802883	1.5	0	SAAG_02592T0	2.3	0	TBCT_00400.1	2.5	0	CAWT_05819	5	0	HCAG_02917T0
	AF014	Lactate/malate dehydrogenase	P17783	Cit la MDH	347	P	yes	96	19295232	Bm1_46465	2e-97	53	LOAG_02046T0	3e-98	56	WUBG_00103T0	2e-98	53	Smp_047370	1e-100	58	psu|PFF0895w	3e-21	31	Tc00.1047053506195.110	3e-89	56	psu|LmjF34.0140	8e-86	54	gb|TGME49_118430	2e-27	31	ECCG_02595T0	3e-86	55	gi|16802256	4e-09	23	SAAG_00420T0	3e-13	28	TBCT_01223.1	3e-06	0	CAWT_03604	6e-95	56	HCAG_03969T0
	AF014	Lactate/malate dehydrogenase	Q9Y750	Mala f 4	342	F	yes	83	10103045	Bm1_46465	1e-95	56	LOAG_02046T0	2e-97	58	WUBG_00103T0	3e-97	57	Smp_047370	1e-84	52	psu|PFF0895w	2e-15	25	Tc00.1047053506195.110	2e-94	57	psu|LmjF34.0140	1e-97	60	gb|TGME49_118430	3e-22	29	ECCG_02595T0	1e-74	51	gi|16802256	2e-07	22	SAAG_00420T0	2e-12	25	TBCT_01223.1	3e-11	30	CAWT_03604	1e-107	61	HCAG_03969T0
	AF015	Lipocalin	B0KZJ6	Aca s 13	131	A	no	23	10474032	Bm1_52220	3e-16	34	LOAG_02073T0	6e-14	32	WUBG_00002T0	6e-17	35	Smp_095360.1	5e-26	45	psu|PFF1285w	0.074	0	Tc00.1047053506949.20	0.11	0	psu|LmjF12.1270	1.3	0	gb|TGME49_096950	1.1	0	ECCG_00450T0	0.13	0	gi|16804771	0.18	0	SAAG_00981T0	0.019	0	TBCT_01015.1	2.5	0	CAWT_01334	0.25	0	HCAG_07444T0
	AF015	Lipocalin	A1KXG8	blo t 13	130	A	no	11	9104789	Bm1_52220	1e-14	37	LOAG_02073T0	2e-13	34	WUBG_00002T0	3e-15	36	Smp_095360.1	3e-25	44	psu|PF14_0583	0.011	0	Tc00.1047053510323.4	4.6	0	psu|LmjF12.1270	2.8	0	gb|TGME49_002580	1.9	0	ECCG_03848T0	0.16	0	gi|16802609	0.23	0	SAAG_00762T0	0.12	0	TBCT_02063.1	0.65	0	CAWT_01116	0.049	0	HCAG_03336T0
	AF015	Lipocalin	Q28133	Bos d 2	172	A	yes	83	18070162	Bm1_41570	0.56	0	LOAG_01800T0	0.12	0	WUBG_02941T0	0.034	0	Smp_065150	5.3	0	psu|PFE0430w	0.13	0	Tc00.1047053508819.10	1.7	0	psu|LmjF16.0180	0.27	0	gb|TGME49_112230	4.4	0	ECCG_01880T0	0.35	0	gi|16803523	0.005	0	SAAG_02045T0	0.26	0	TBCT_00955.1	3.1	0	CAWT_04978	0.94	0	HCAG_04345T0
	AF015	Lipocalin	P02754	Bos d 5	178	A	yes	51	20860558	Bm1_00655	0.46	0	LOAG_01489T0	0.37	0	WUBG_03508T0	0.4	0	Smp_154550	1.9	0	psu|PF13_0226	0.52	0	Tc00.1047053507849.40	0.81	0	psu|LmjF13.0390	3.2	0	gb|TGME49_035920	1.6	0	ECCG_02856T0	1.1	0	gi|16804279	0.68	0	SAAG_01777T0	0.46	0	TBCT_02566.1	1.9	0	CAWT_05402	1	0	HCAG_03963T0
	AF015	Lipocalin	O18873	Can f 1	174	A	yes	67	20621650	Bm1_44100	0.98	0	LOAG_06258T0	0.21	0	WUBG_04911T0	0.38	0	Smp_170630	16	0	psu|PFA0485w	5.5	0	Tc00.1047053504153.110	1.3	0	psu|LmjF02.0120	0.025	0	gb|TGME49_118350	3.5	0	ECCG_03676T0	0.61	0	gi|16803158	1.9	0	SAAG_01489T0	0.45	0	TBCT_03255.1	1.4	0	CAWT_01423	0.15	0	HCAG_10665T0
	AF015	Lipocalin	O18874	Can f 2	180	A	no	40	20621650	Bm1_28595	0.36	0	LOAG_14676T0	0.5	0	WUBG_00543T0	2.6	0	Smp_138860	13	0	psu|PFL1535w	0.24	0	Tc00.1047053506297.200	3.2	0	psu|LmjF32.0310	4.2	0	gb|TGME49_038180	0.97	0	ECCG_00609T0	4.2	0	gi|16803351	1.5	0	SAAG_01417T0	2.3	0	TBCT_02408.1	3.3	0	CAWT_05100	1	0	HCAG_11109T0
	AF015	Lipocalin	A1KXH1	Der f 13	140	A	NA			Bm1_52220	4e-14	35	LOAG_02073T0	5e-13	41	WUBG_00002T0	3e-14	35	Smp_095360.1	2e-20	39	psu|PF11_0455	0.066	0	Tc00.1047053509065.90	2.5	0	psu|LmjF34.1500	3.4	0	gb|TGME49_090330	0.35	0	ECCG_03668T0	2.1	0	gi|16804771	0.27	0	SAAG_00458T0	0.14	0	TBCT_02789.1	1.7	0	CAWT_03306	0.17	0	HCAG_01737T0
	AF015	Lipocalin	Q95182	Equ c 1	187	A	yes	76	18070162	Bm1_02740	0.13	0	LOAG_00084T0	0.53	0	WUBG_10969T0	0.19	0	Smp_062680	8.3	0	psu|PF14_0229	0.11	0	Tc00.1047053506357.130	0.53	0	psu|LmjF35.3160	1.6	0	gb|TGME49_092020	1.4	0	ECCG_03632T0	1.5	0	gi|16803155	0.03	0	SAAG_00762T0	0.17	0	TBCT_03405.1	10	0	CAWT_00498	0.83	0	HCAG_07820T0
	AF015	Lipocalin	Q5VFH6	Fel d 4	186	A	yes	63	15544598	Bm1_28490	1.9	0	LOAG_09237T0	0.18	0	WUBG_07407T0	0.19	0	Smp_158550	2.1	0	psu|PF10_0357	0.051	0	Tc00.1047053509753.60	0.89	0	psu|LmjF11.0180	2	0	gb|TGME49_095320	5.1	0	ECCG_00412T0	0.4	0	gi|16804041	0.066	0	SAAG_01035T0	0.29	0	TBCT_03534.1	3.5	0	CAWT_02613	0.63	0	HCAG_10554T0
	AF015	Lipocalin	P02762	Mus m 1	180	A	yes	66	18070162	Bm1_54625	0.12	0	LOAG_10377T0	0.29	0	WUBG_06913T0	0.11	0	Smp_127050	2.6	0	psu|PF11_0460	0.18	0	Tc00.1047053509797.60	4.1	0	psu|LmjF34.2570	0.38	0	gb|TGME49_024880	0.15	0	ECCG_01302T0	1.5	0	gi|16803101	0.01	0	SAAG_00499T0	0.21	0	TBCT_01984.1	4.4	0	CAWT_02441	0.35	0	HCAG_04971T0
	AF015	Lipocalin	P02761	Rat n 1	181	A	yes	66	3819230	Bm1_39920	1.4	0	LOAG_06048T0	2.5	0	WUBG_08197T0	0.41	0	Smp_143010	5.9	0	psu|PF14_0422	0.14	0	Tc00.1047053511599.90	3.2	0	psu|LmjF34.2570	1.5	0	gb|TGME49_080660	2.8	0	ECCG_02119T0	2.5	0	gi|16802857	0.54	0	SAAG_01732T0	0.16	0	TBCT_03338.1	9.8	0	CAWT_05058	0.6	0	HCAG_07820T0
	AF015	Lipocalin	A7XZL4	Tyr p 13	131	A	no	6	15879018	Bm1_52220	2e-16	34	LOAG_02073T0	2e-15	34	WUBG_00002T0	4e-17	35	Smp_095360.1	6e-24	43	psu|PFF0385c	0.019	0	Tc00.1047053506559.129	0.25	0	psu|LmjF21.0200	1.3	0	gb|TGME49_025000	0.86	0	ECCG_04428T0	0.37	0	gi|16804217	0.048	0	SAAG_02205T0	0.28	0	TBCT_03076.1	0.39	0	CAWT_04378	0.086	0	HCAG_07444T0
	AF017	Protein kinase	Q8L5K9	Sal k 2	320	P	yes	100	Allergome	Bm1_38375	6e-26	32	LOAG_07622T0	2e-29	35	WUBG_02567T0	1e-26	32	Smp_128550	5e-20	32	psu|PFB0520w	2e-15	28	Tc00.1047053506529.340	2e-16	29	psu|LmjF13.0440	6e-18	33	gb|TGME49_025770	5e-28	36	ECCG_03496T0	5e-07	27	gi|16803860	1e-19	33	SAAG_01817T0	9e-18	30	TBCT_00014.1	5e-18	29	CAWT_04266	5e-16	32	HCAG_06167T0
	AF018	Serpin serine protease inhibitor	P01012	Gal d 2	386	A	yes	52	20633029	Bm1_18355	2e-40	29	LOAG_12205T0	3e-33	30	WUBG_15870T0	3e-36	31	Smp_155530	2e-38	26	psu|PF11_0234	0.33	0	Tc00.1047053506777.40	3.5	0	psu|LmjF35.3920	2	0	gb|TGME49_017430	5e-25	27	ECCG_02956T0	0.098	0	gi|16804161	0.67	0	SAAG_02553T0	0.2	0	TBCT_01886.1	0.23	0	CAWT_03378	0.011	0	HCAG_09034T0
	AF019	Cu/Zn Superoxide dismutase	P80740	Ole e 5	30	P	no	35	9500754	Bm1_46430	3.9	0	LOAG_01904T0	3.5	0	WUBG_15156T0	20	0	Smp_176200.2	15	0	psu|MAL13P1.279	25	0	Tc00.1047053508917.4	21	0	psu|LmjF08.0910	6.6	0	gb|TGME49_054940	9.7	0	ECCG_01877T0	6.7	0	gi|16802827	12	0	SAAG_00129T0	2.1	0	TBCT_01451.1	6.8	0	CAWT_03562	0.41	0	HCAG_11576T0
	AF020	Fe/Mn superoxide dismutase	Q92450	Asp f 6	210	F	no	50	9482698	Bm1_48045	5e-46	42	LOAG_08473T0	3e-46	42	WUBG_06733T0	3e-46	42	Smp_056440	2e-54	50	psu|PF08_0071	2e-33	38	Tc00.1047053511715.10	6e-36	40	psu|LmjF32.1830	9e-35	38	gb|TGME49_116330	1e-35	41	ECCG_04467T0	4e-45	45	gi|16803479	2e-46	47	SAAG_01467T0	2e-45	41	TBCT_03774.1	7e-45	44	CAWT_05368	7e-55	50	HCAG_03448T0
	AF020	Fe/Mn superoxide dismutase	Q9STB5	Hev b 10	205	P	no	10	11167363	Bm1_48045	3e-58	51	LOAG_08473T0	3e-58	51	WUBG_06733T0	3e-58	52	Smp_056440	9e-59	57	psu|PF08_0071	4e-30	35	Tc00.1047053511715.10	9e-32	39	psu|LmjF32.1830	3e-31	36	gb|TGME49_116310	2e-34	40	ECCG_04467T0	5e-43	42	gi|16803479	1e-44	42	SAAG_01467T0	8e-43	41	TBCT_03774.1	2e-45	45	CAWT_01225	1e-55	51	HCAG_01543T0
	AF020	Fe/Mn superoxide dismutase	B2BDZ8	Pis v 4	230	P	no	40	20567132	Bm1_48045	5e-57	50	LOAG_08473T0	2e-56	50	WUBG_06733T0	1e-56	51	Smp_056440	6e-60	60	psu|PF08_0071	1e-30	34	Tc00.1047053511715.10	1e-30	38	psu|LmjF32.1830	8e-32	37	gb|TGME49_116310	1e-35	40	ECCG_04467T0	2e-44	44	gi|16803479	7e-45	42	SAAG_01467T0	4e-44	43	TBCT_03774.1	1e-45	45	CAWT_01225	2e-56	50	HCAG_01543T0
	AF021	Subtilisin-like serine protease	A1C6U7	Asp f 13	155	F	no	0	8112866	Bm1_53655	3	0	LOAG_13945T0	0.38	0	WUBG_06905T0	0.31	0	Smp_172420	9.4	0	psu|MAL13P1.535	1.5	0	Tc00.1047053508973.60	1.1	0	psu|LmjF07.0860	0.22	0	gb|TGME49_026950	0.33	0	ECCG_02353T0	0.059	0	gi|16804808	0.93	0	SAAG_00414T0	1.1	0	TBCT_03794.1	0.53	0	CAWT_02083	0.12	0	HCAG_05852T0
	AF021	Subtilisin-like serine protease	Q9UVU3	Asp fl 1	403	F	yes	64	10474033	Bm1_08700	5e-14	28	LOAG_07390T0	1e-12	28	WUBG_11889T0	4e-13	28	Smp_154140	2e-08	26	psu|PF11_0381	2e-12	26	Tc00.1047053509669.20	1e-07	27	psu|LmjF35.0550	0.19	0	gb|TGME49_114500	3e-17	31	ECCG_04010T0	0.005	0	gi|16802890	0.002	0	SAAG_00530T0	1e-13	30	TBCT_03810.1	4e-07	24	CAWT_05716	8e-76	42	HCAG_06003T0
	AF021	Subtilisin-like serine protease	B7ZK61	Cla h 9	518	F	no	15	19162325	Bm1_08700	4e-08	27	LOAG_07390T0	7e-07	26	WUBG_11889T0	2e-07	27	Smp_154140	5e-06	0	psu|PFE0355c	2e-10	26	Tc00.1047053509669.20	0.35	0	psu|LmjF26.0840	1	0	gb|TGME49_031060	7e-24	36	ECCG_04010T0	0.31	0	gi|16802763	0.017	0	SAAG_00530T0	2e-07	23	TBCT_03810.1	4e-05	0	CAWT_05716	1e-132	56	HCAG_00635T0
	AF021	Subtilisin-like serine protease	Q9Y749	Pen c 1	397	F	yes	100	8732242	Bm1_08700	3e-11	29	LOAG_07390T0	8e-10	28	WUBG_11889T0	8e-11	28	Smp_154140	0.002	0	psu|PF11_0381	9e-13	27	Tc00.1047053509669.20	0.0001	0	psu|LmjF35.0540	0.0001	0	gb|TGME49_031060	2e-22	35	ECCG_03268T0	2e-05	0	gi|16803706	0.004	0	SAAG_00530T0	4e-11	29	TBCT_03388.1	4e-09	27	CAWT_05716	6e-71	38	HCAG_06003T0
	AF021	Subtilisin-like serine protease	Q9HF11	Pen c 18	358	F	yes	100	11174468	Bm1_08700	2e-09	28	LOAG_07390T0	2e-08	27	WUBG_11889T0	2e-08	27	Smp_154140	3e-06	0	psu|PF11_0381	3e-12	28	Tc00.1047053509669.20	0.005	0	psu|LmjF27.2130	0.48	0	gb|TGME49_031060	2e-24	38	ECCG_01737T0	0.069	0	gi|16802244	1	0	SAAG_00530T0	3e-11	24	TBCT_00288.1	6e-06	0	CAWT_05716	1e-121	69	HCAG_00635T0
	AF021	Subtilisin-like serine protease	Q9URR2	Pen ch 13	397	F	yes	88	10231324	Bm1_08700	2e-10	28	LOAG_07390T0	5e-09	27	WUBG_11889T0	5e-10	28	Smp_154140	0.012	0	psu|PF11_0381	2e-12	27	Tc00.1047053509669.20	0.0001	0	psu|LmjF35.0540	3e-05	0	gb|TGME49_031060	3e-22	35	ECCG_03268T0	9e-06	0	gi|16803706	0.007	0	SAAG_00530T0	5e-10	28	TBCT_03388.1	3e-09	27	CAWT_05716	4e-71	38	HCAG_06003T0
	AF021	Subtilisin-like serine protease	Q9P8G3	Pen ch 18	494	F	yes	82	10231324	Bm1_08700	4e-09	28	LOAG_07390T0	3e-08	27	WUBG_11889T0	3e-08	27	Smp_154140	4e-05	0	psu|PF11_0381	6e-11	27	Tc00.1047053509669.20	0.008	0	psu|LmjF26.2640	0.19	0	gb|TGME49_031060	1e-22	38	ECCG_04010T0	0.5	0	gi|16802867	1.2	0	SAAG_00530T0	7e-10	23	TBCT_00288.1	1e-06	0	CAWT_05716	1e-138	58	HCAG_00635T0
	AF021	Subtilisin-like serine protease	Q9HF12	Pen o 18	503	F	yes	94	10231324	Bm1_08700	6e-07	26	LOAG_07390T0	7e-06	0	WUBG_11889T0	3e-06	0	Smp_149400	0.0001	0	psu|PF11_0381	8e-11	26	Tc00.1047053509669.20	0.44	0	psu|LmjF26.0840	0.018	0	gb|TGME49_031060	1e-23	36	ECCG_00453T0	0.027	0	gi|16804642	0.24	0	SAAG_00530T0	2e-10	23	TBCT_03388.1	3e-06	0	CAWT_05716	1e-140	59	HCAG_00635T0
	AF021	Subtilisin-like serine protease	Q32ZM1	Rho m 2	342	F	yes	57	16179794	Bm1_08700	5e-09	27	LOAG_07390T0	6e-08	27	WUBG_11889T0	2e-08	27	Smp_149400	0.0009	0	psu|PF11_0381	4e-10	25	Tc00.1047053509669.20	0.006	0	psu|LmjF36.5160	0.35	0	gb|TGME49_031060	8e-26	40	ECCG_03540T0	0.42	0	gi|16804124	0.76	0	SAAG_00530T0	3e-09	24	TBCT_03388.1	5e-07	23	CAWT_05716	1e-164	82	HCAG_00635T0
	AF021	Subtilisin-like serine protease	Q9UW97	Tri r 2	412	F	no	42	9792655	Bm1_08700	2e-09	25	LOAG_07390T0	6e-08	24	WUBG_11889T0	7e-09	25	Smp_154140	0.002	0	psu|PF11_0381	4e-19	29	Tc00.1047053510213.80	0.089	0	psu|LmjF12.0430	0.003	0	gb|TGME49_031060	6e-26	36	ECCG_04174T0	0.028	0	gi|16803706	0.72	0	SAAG_00530T0	1e-11	30	TBCT_03810.1	1e-10	25	CAWT_05716	4e-71	39	HCAG_06003T0
	AF023	Thioredoxin	Q4WV97	Asf f 29	110	F	no	50	19032234	Bm1_05440	2e-17	40	LOAG_10745T0	7e-17	44	WUBG_10864T0	9e-11	39	Smp_008070	8e-17	42	psu|PF14_0545	2e-15	41	Tc00.1047053511577.83	3e-11	36	psu|LmjF01.0270	3e-11	37	gb|TGME49_093870	4e-20	40	ECCG_01087T0	3e-13	34	gi|16803273	2e-14	38	SAAG_02253T0	3e-17	47	TBCT_00806.1	0.004	0	CAWT_02294	4e-21	44	HCAG_00878T0
	AF023	Thioredoxin	Q1RQJ1	Asp f 28	108	F	no	30	19032234	Bm1_05440	3e-17	40	LOAG_10745T0	3e-17	40	WUBG_10864T0	1e-12	36	Smp_008070	2e-19	54	psu|PF14_0545	2e-17	44	Tc00.1047053511577.83	2e-09	32	psu|LmjF01.0270	2e-10	33	gb|TGME49_093870	2e-19	50	ECCG_01087T0	6e-14	37	gi|16803273	2e-13	37	SAAG_02253T0	5e-15	40	TBCT_00806.1	7e-07	32	CAWT_02294	1e-20	41	HCAG_00878T0
	AF023	Thioredoxin	Q1RQI9	Mala s 13	105	F	no	50	19032234	Bm1_05440	3e-18	42	LOAG_10745T0	1e-17	42	WUBG_01313T0	8e-12	36	Smp_008070	3e-17	48	psu|PF14_0545	1e-21	40	Tc00.1047053511577.83	2e-13	38	psu|LmjF30.1010	2e-14	37	gb|TGME49_093870	5e-22	39	ECCG_01087T0	6e-18	46	gi|16803273	2e-16	38	SAAG_02253T0	8e-18	45	TBCT_00520.1	1e-05	0	CAWT_02294	4e-22	40	HCAG_00878T0
	AF024	Trypsin-like serine protease	Q8MQS8	Api m 7	405	A	NA			Bm1_19535	2e-23	27	LOAG_10674T0	1e-13	31	WUBG_17249T0	3e-11	31	Smp_103680	1e-18	29	psu|PFF0795w	0.35	0	Tc00.1047053509775.30	11	0	psu|LmjF16.0260	18	0	gb|TGME49_005740	3.2	0	ECCG_00118T0	1.2	0	gi|16803711	1.2	0	SAAG_01492T0	0.13	0	TBCT_01914.1	2.6	0	CAWT_05823	2.5	0	HCAG_11430T0
	AF024	Trypsin-like serine protease	A1KXI1	Blo t 3	266	A	no	50	12708986	Bm1_19535	3e-23	31	LOAG_10674T0	5e-17	36	WUBG_17249T0	3e-17	37	Smp_030350	5e-25	31	psu|MAL13P1.349	2.9	0	Tc00.1047053503609.50	0.11	0	psu|LmjF16.0300	0.11	0	gb|TGME49_090840	0.009	0	ECCG_03164T0	1.5	0	gi|16804591	1.6	0	SAAG_01717T0	0.48	0	TBCT_01792.1	0.028	0	CAWT_01817	1.1	0	HCAG_01701T0
	AF024	Trypsin-like serine protease	A1KXI3	Blo t 6	275	A	no	10	14692433	Bm1_19535	5e-13	24	LOAG_10674T0	8e-06	0	WUBG_05373T0	1e-07	25	Smp_030350	4e-14	29	psu|PF11_0506	2.3	0	Tc00.1047053509979.200	0.57	0	psu|LmjF35.1180	0.2	0	gb|TGME49_035950	1.5	0	ECCG_01102T0	0.32	0	gi|16803255	0.98	0	SAAG_02193T0	0.65	0	TBCT_03594.1	0.56	0	CAWT_01913	0.18	0	HCAG_05562T0
	AF024	Trypsin-like serine protease	B7U5S5	Der f 3	259	A	no	16	8563488	Bm1_19535	3e-26	31	LOAG_10674T0	2e-17	33	WUBG_17249T0	1e-17	37	Smp_030350	7e-28	34	psu|PFD0020c	3.6	0	Tc00.1047053508979.50	0.001	0	psu|LmjF34.0520	2.6	0	gb|TGME49_115360	0.6	0	ECCG_02985T0	1.1	0	gi|16802841	0.69	0	SAAG_02424T0	3	0	TBCT_03594.1	0.046	0	CAWT_00448	0.033	0	HCAG_05372T0
	AF024	Trypsin-like serine protease	B7U5T1	Der f 6	279	A	no	41	8334537	Bm1_19535	3e-15	26	LOAG_03183T0	5e-07	26	WUBG_05373T0	2e-10	28	Smp_030350	8e-15	30	psu|MAL7P1.92	0.62	0	Tc00.1047053507467.10	19	0	psu|LmjF30.2880	1.7	0	gb|TGME49_119310	7.4	0	ECCG_02593T0	0.42	0	gi|16802219	0.76	0	SAAG_01718T0	0.004	0	TBCT_03594.1	0.98	0	CAWT_01633	0.14	0	HCAG_01701T0
	AF024	Trypsin-like serine protease	P39675	Der p 3	261	A	no	9	16890759	Bm1_19535	2e-26	31	LOAG_10674T0	5e-17	34	WUBG_17249T0	1e-17	37	Smp_129230	1e-27	35	psu|PF11_0354	2.1	0	Tc00.1047053506855.120	4.5	0	psu|LmjF31.0840	0.53	0	gb|TGME49_047700	2.3	0	ECCG_04182T0	0.86	0	gi|16804718	1.2	0	SAAG_01718T0	0.095	0	TBCT_03594.1	0.004	0	CAWT_02234	1.1	0	HCAG_08212T0
	AF024	Trypsin-like serine protease	Q7Z163	Der p 9	273	A	yes	92	8876548	Bm1_19535	3e-19	27	LOAG_10674T0	7e-10	31	WUBG_05373T0	1e-12	32	Smp_103680	3e-18	30	psu|PFF0575c	0.6	0	Tc00.1047053511189.84	0.33	0	psu|LmjF31.0500	0.2	0	gb|TGME49_088940	1.4	0	ECCG_03764T0	0.7	0	gi|16804268	8.2	0	SAAG_01190T0	3.2	0	TBCT_03594.1	1.2	0	CAWT_05003	0.23	0	HCAG_01584T0
	AF024	Trypsin-like serine protease	Q7Z269	Pol d 4	277	A	NA			Bm1_19535	9e-25	29	LOAG_10674T0	7e-12	28	WUBG_17249T0	5e-10	29	Smp_103680	1e-15	26	psu|PFD1045c	0.073	0	Tc00.1047053511907.130	0.12	0	psu|LmjF10.0500	8.4	0	gb|TGME49_115530	7.3	0	ECCG_03795T0	0.71	0	gi|16804428	2.2	0	SAAG_02398T0	4.3	0	TBCT_01124.1	1.3	0	CAWT_03472	0.047	0	HCAG_03678T0
	AF025	Tubulin/FtsZ family	Q8WQ47	Lep d alpha Tubulin	450	A	no	12	12740526	Bm1_38680	0	88	LOAG_02725T0	0	88	WUBG_09795T0	0	86	Smp_090120.1	0	94	psu|PFI0180w	0	83	Tc00.1047053411235.9	0	83	psu|LmjF13.0390	0	81	gb|TGME49_116400	0	83	ECCG_02791T0	5	0	gi|16804449	0.011	0	SAAG_01269T0	0.32	0	TBCT_01766.1	1	0	CAWT_02186	1e-148	77	HCAG_02068T0
	AF025	Tubulin/FtsZ family	Q52PV9	Tyr p alpha Tubulin	450	A	no	29	16339071	Bm1_38680	0	88	LOAG_02725T0	0	88	WUBG_09795T0	0	86	Smp_090120.1	0	94	psu|PFI0180w	0	82	Tc00.1047053411235.9	0	81	psu|LmjF13.0390	0	80	gb|TGME49_116400	0	82	ECCG_02261T0	2.9	0	gi|16804449	0.011	0	SAAG_01269T0	0.32	0	TBCT_03699.1	2.3	0	CAWT_02186	1e-147	75	HCAG_02068T0
	AF026	Pectin methylesterase	C1KET9	Sal k 1	339	P	yes	66	14616126	Bm1_52465	1.2	0	LOAG_00672T0	0.11	0	WUBG_00223T0	0.59	0	Smp_148390	1.5	0	psu|PFL0925w	0.025	0	Tc00.1047053506769.80	2.9	0	psu|LmjF33.2070	2.9	0	gb|TGME49_037440	1.1	0	ECCG_01157T0	0.004	0	gi|16802363	1.3	0	SAAG_01591T0	0.66	0	TBCT_02469.1	0.33	0	CAWT_05066	0.4	0	HCAG_02362T0
	AF027	Cysteine-rich trypsin inhibitor-like domain	Q27SJ7	Api m 6	94	A	no	42	11344362	Bm1_29730	2e-06	0	LOAG_11088T0	5e-05	0	WUBG_03707T0	4e-08	33	Smp_179300.3	0.63	0	psu|PF14_0214	1	0	Tc00.1047053503603.10	0.17	0	psu|LmjF35.4130	0.032	0	gb|TGME49_121520	0.021	0	ECCG_02776T0	0.61	0	gi|16803512	0.28	0	SAAG_01493T0	0.57	0	TBCT_00588.1	0.043	0	CAWT_04998	0.05	0	HCAG_00176T0
	AF028	Short-chain dehydrogenase	P0C0Y4	Alt a 8	266	F	no	41	17177674	Bm1_07940	2e-20	29	LOAG_08780T0	1e-13	31	WUBG_08673T0	2e-17	28	Smp_042680	4e-13	28	psu|PFI1125c	1e-24	29	Tc00.1047053507049.60	6e-18	27	psu|LmjF24.2030	2e-11	26	gb|TGME49_017740	1e-24	28	ECCG_01507T0	7e-32	33	gi|16803847	5e-39	35	SAAG_01828T0	2e-33	32	TBCT_01331.1	5e-29	33	CAWT_03188	6e-70	50	HCAG_00626T0
	AF028	Short-chain dehydrogenase	P0C0Y5	Cla h 8	267	F	yes	57	16608840	Bm1_07940	3e-18	27	LOAG_08780T0	4e-15	31	WUBG_08673T0	2e-14	26	Smp_042680	1e-12	26	psu|PFI1125c	1e-23	28	Tc00.1047053507049.60	1e-15	24	psu|LmjF24.2030	4e-11	27	gb|TGME49_017740	5e-24	28	ECCG_01507T0	2e-28	30	gi|16803847	4e-37	33	SAAG_01828T0	8e-30	29	TBCT_01331.1	1e-25	30	CAWT_03189	2e-71	50	HCAG_00626T0
	AF029	Zn-containing dehydrogenase	P43067	cand a 1	350	F	yes	77	2665907	Bm1_52445	9e-18	26	LOAG_12517T0	2e-23	26	WUBG_13067T0	3e-19	29	Smp_044440	4e-15	25	psu|PFC0490w	4.2	0	Tc00.1047053508677.80	6e-34	30	psu|LmjF23.0360	5e-33	27	gb|TGME49_111780	9e-20	29	ECCG_00026T0	9e-58	39	gi|16802549	6e-25	29	SAAG_01028T0	6e-60	38	TBCT_02981.1	3e-33	28	CAWT_04871	0	99	HCAG_06397T0
	AF030	Papain-like cysteine protease	P00785	Act d 1	380	P	yes	100	9564807	Bm1_20385	2e-51	37	LOAG_07188T0	6e-52	37	WUBG_09291T0	3e-42	40	Smp_157090	6e-59	40	psu|PF11_0162	1e-52	38	Tc00.1047053507603.260	2e-49	33	psu|LmjF08.1020	2e-49	32	gb|TGME49_121530	6e-67	42	ECCG_03981T0	0.16	0	gi|16803718	0.078	0	SAAG_00247T0	1.3	0	TBCT_01554.1	0.84	0	CAWT_06039	0.27	0	HCAG_08233T0
	AF030	Papain-like cysteine protease	O23791	Ana c 2	351	A	NA			Bm1_13265	7e-47	34	LOAG_12600T0	2e-43	32	WUBG_08666T0	3e-38	36	Smp_157090	1e-53	36	psu|PF11_0162	1e-48	33	Tc00.1047053508173.110	3e-51	34	psu|LmjF08.1030	5e-48	33	gb|TGME49_121530	5e-63	38	ECCG_03945T0	0.57	0	gi|16804376	0.041	0	SAAG_01442T0	1.5	0	TBCT_02300.1	0.2	0	CAWT_04472	0.19	0	HCAG_01766T0
	AF030	Papain-like cysteine protease	A1KXI0	blo t 1	333	A	yes	65	12911421	Bm1_20385	4e-36	34	LOAG_12600T0	3e-37	34	WUBG_10993T0	9e-34	35	Smp_034410.1	4e-35	29	psu|PF11_0162	9e-34	32	Tc00.1047053508173.110	1e-36	32	psu|LmjF08.1030	6e-40	30	gb|TGME49_121530	6e-37	32	ECCG_00498T0	0.9	0	gi|16804376	0.003	0	SAAG_00108T0	0.034	0	TBCT_01868.1	0.085	0	CAWT_00929	0.87	0	HCAG_08184T0
	AF030	Papain-like cysteine protease	P00784	Car p 1	345	P	yes	90	9298178	Bm1_20385	1e-47	36	LOAG_12600T0	1e-48	37	WUBG_09291T0	1e-35	41	Smp_157090	8e-40	34	psu|PF11_0162	1e-44	35	Tc00.1047053507603.270	1e-40	32	psu|LmjF08.1010	9e-40	33	gb|TGME49_121530	2e-53	39	ECCG_00550T0	4.7	0	gi|16803307	0.26	0	SAAG_01957T0	0.39	0	TBCT_00570.1	0.15	0	CAWT_02566	0.14	0	HCAG_03606T0
	AF030	Papain-like cysteine protease	A1KXH2	Der f 1	263	A	yes	87	2428875	Bm1_20385	3e-21	33	LOAG_07188T0	9e-20	32	WUBG_08666T0	1e-19	35	Smp_034410.1	5e-18	32	psu|PF11_0165	8e-22	32	Tc00.1047053509429.320	1e-18	32	psu|LmjF08.1030	5e-23	32	gb|TGME49_121530	9e-26	31	ECCG_04318T0	1.9	0	gi|16803844	0.18	0	SAAG_01379T0	0.28	0	TBCT_03690.1	9.9	0	CAWT_01991	0.13	0	HCAG_08775T0
	AF030	Papain-like cysteine protease	B5AYU7	Der p 1	320	A	yes	91	19021722	Bm1_20385	3e-33	35	LOAG_12600T0	9e-28	36	WUBG_10993T0	3e-24	33	Smp_157090	1e-22	27	psu|PF11_0165	3e-27	30	Tc00.1047053507537.20	2e-25	26	psu|LmjF08.1030	1e-29	26	gb|TGME49_121530	2e-31	30	ECCG_02587T0	0.66	0	gi|16804376	0.037	0	SAAG_00319T0	0.27	0	TBCT_02063.1	0.68	0	CAWT_01991	0.28	0	HCAG_06621T0
	AF030	Papain-like cysteine protease	P25780	Eur m 1	321	A	yes	88	9275144	Bm1_20385	2e-33	36	LOAG_12600T0	2e-30	34	WUBG_10993T0	2e-26	35	Smp_157090	6e-25	28	psu|PF11_0165	1e-30	32	Tc00.1047053508173.110	2e-26	29	psu|LmjF08.1030	2e-33	28	gb|TGME49_121530	4e-32	29	ECCG_03900T0	0.39	0	gi|16804376	0.24	0	SAAG_00091T0	1.8	0	TBCT_03353.1	22	0	CAWT_01991	0.17	0	HCAG_08775T0
	AF030	Papain-like cysteine protease	O64458	Gly m Bd 30K	379	A	yes	65	10589015	Bm1_20385	1e-40	33	LOAG_07188T0	2e-50	37	WUBG_09291T0	3e-45	42	Smp_157090	1e-48	36	psu|PF11_0162	6e-48	35	Tc00.1047053508173.110	1e-48	34	psu|LmjF08.1020	2e-50	38	gb|TGME49_121530	1e-54	38	ECCG_01471T0	0.81	0	gi|16804376	0.012	0	SAAG_01104T0	0.2	0	TBCT_02001.1	0.84	0	CAWT_00685	1	0	HCAG_01856T0
	AF031	Enolase	Q9HDT3	Alt a 6	438	F	no	15	15940136	Bm1_24115	1e-153	63	LOAG_00912T0	1e-155	64	WUBG_09164T0	4e-84	61	Smp_024110	1e-147	62	psu|PF10_0155	1e-143	60	Tc00.1047053504105.140	1e-139	59	psu|LmjF14.1160	1e-134	58	gb|TGME49_068850	1e-135	58	ECCG_02134T0	1e-108	52	gi|16804493	1e-114	52	SAAG_01201T0	1e-111	50	TBCT_01010.1	1e-109	51	CAWT_00576	1e-180	73	HCAG_04180T0
	AF031	Enolase	Q96X30	Asp f 22	438	F	no	30	11979043	Bm1_24115	1e-158	64	LOAG_00912T0	1e-160	66	WUBG_09164T0	1e-88	64	Smp_024110	1e-150	63	psu|PF10_0155	1e-147	62	Tc00.1047053504105.140	1e-139	59	psu|LmjF14.1160	1e-136	59	gb|TGME49_068850	1e-138	59	ECCG_02134T0	1e-103	50	gi|16804493	1e-113	51	SAAG_01201T0	1e-109	50	TBCT_01010.1	1e-110	52	CAWT_00576	0	74	HCAG_04180T0
	AF031	Enolase	P42040	Cla h 6	440	F	no	20	7898496	Bm1_24115	1e-152	62	LOAG_00912T0	1e-155	64	WUBG_09164T0	2e-85	62	Smp_024110	1e-150	62	psu|PF10_0155	1e-148	61	Tc00.1047053504105.140	1e-139	58	psu|LmjF14.1160	1e-138	58	gb|TGME49_068850	1e-137	58	ECCG_02134T0	1e-111	51	gi|16804493	1e-116	51	SAAG_01201T0	1e-116	51	TBCT_01010.1	1e-111	51	CAWT_00576	0	73	HCAG_04180T0
	AF031	Enolase	Q7XAS6	Cyn d 22	446	P	NA			Bm1_24115	1e-164	68	LOAG_00912T0	1e-162	67	WUBG_09164T0	2e-91	70	Smp_024110	1e-160	67	psu|PF10_0155	1e-171	68	Tc00.1047053504105.140	1e-138	59	psu|LmjF14.1160	1e-135	58	gb|TGME49_068850	1e-171	67	ECCG_02134T0	1e-111	52	gi|16804493	1e-118	51	SAAG_01201T0	1e-112	49	TBCT_01010.1	1e-116	52	CAWT_00576	1e-145	62	HCAG_04180T0
	AF031	Enolase	Q9LEJ0	Hev b 9	445	P	no	14	11106410	Bm1_24115	1e-162	68	LOAG_00912T0	1e-161	67	WUBG_09164T0	7e-91	69	Smp_024110	1e-162	68	psu|PF10_0155	1e-168	68	Tc00.1047053504105.140	1e-134	59	psu|LmjF14.1160	1e-135	59	gb|TGME49_068850	1e-174	69	ECCG_02134T0	1e-117	54	gi|16804493	1e-117	52	SAAG_01201T0	1e-111	50	TBCT_01010.1	1e-116	52	CAWT_00576	1e-147	63	HCAG_04180T0
	AF031	Enolase	Q96X46	Pen c 22	438	F	no	30	11979043	Bm1_24115	1e-156	64	LOAG_00912T0	1e-155	64	WUBG_09164T0	3e-87	63	Smp_024110	1e-147	62	psu|PF10_0155	1e-142	60	Tc00.1047053504105.140	1e-135	59	psu|LmjF14.1160	1e-134	59	gb|TGME49_068850	1e-134	57	ECCG_02134T0	1e-103	50	gi|16804493	1e-112	51	SAAG_01201T0	1e-109	50	TBCT_01010.1	1e-109	52	CAWT_00576	0	74	HCAG_04180T0
	AF031	Enolase	Q870B9	rho m 1	439	F	no	21	12432231	Bm1_24115	1e-157	65	LOAG_00912T0	1e-160	66	WUBG_09164T0	1e-88	63	Smp_024110	1e-151	62	psu|PF10_0155	1e-146	61	Tc00.1047053504105.140	1e-139	59	psu|LmjF14.1160	1e-134	58	gb|TGME49_068850	1e-140	58	ECCG_02134T0	1e-110	52	gi|16804493	1e-118	52	SAAG_01201T0	1e-119	51	TBCT_01010.1	1e-117	53	CAWT_00576	0	85	HCAG_04180T0
	AF032	Triosephosphate isomerase	Q9FS79	Tri a 31	253	P	no	10	11972495	Bm1_29130	5e-77	56	LOAG_09607T0	1e-76	56	WUBG_05225T0	1e-33	64	Smp_003990	3e-78	59	psu|PF14_0378	2e-57	45	Tc00.1047053508647.200	2e-66	52	psu|LmjF24.0850	3e-70	56	gb|TGME49_033500	3e-70	52	ECCG_04477T0	3e-49	43	gi|16804495	6e-45	40	SAAG_01199T0	4e-47	43	TBCT_01414.1	5e-44	42	CAWT_03053	2e-67	49	HCAG_02511T0
	AF033	Alpha-amylase	A1KXI2	Blo t 4	506	A	no	28	19033729	Bm1_02775	0.001	0	LOAG_06995T0	0.002	0	WUBG_14768T0	0.017	0	Smp_137220	0.18	0	psu|PF11_0441a	0.12	0	Tc00.1047053509973.70	4.9	0	psu|LmjF35.5090	2.2	0	gb|TGME49_009960	0.13	0	ECCG_00378T0	0.004	0	gi|16804165	0.0005	0	SAAG_00929T0	3e-05	0	TBCT_00125.1	0.003	0	CAWT_03615	0.85	0	HCAG_04534T0
	AF033	Alpha-amylase	Q9Y197	Der p 4	496	A	no	30	19021722	Bm1_02775	0.045	0	LOAG_06995T0	0.048	0	WUBG_14768T0	0.022	0	Smp_157550	4.3	0	psu|PF11_0483	0.12	0	Tc00.1047053510719.150	0.19	0	psu|LmjF34.0600	0.56	0	gb|TGME49_009960	0.49	0	ECCG_03828T0	0.002	0	gi|16804165	3e-06	0	SAAG_00929T0	1e-05	0	TBCT_00125.1	0.012	0	CAWT_04592	0.22	0	HCAG_04534T0
	AF034	Legume lectin	P02872	Ara h Agglutinin	273	A	no	50	7920014	Bm1_46695	0.31	0	LOAG_09365T0	0.55	0	WUBG_07495T0	0.26	0	Smp_128720	2.5	0	psu|PFI1280c	1	0	Tc00.1047053510377.430	0.023	0	psu|LmjF30.2260	1.3	0	gb|TGME49_112590	0.5	0	ECCG_04010T0	0.24	0	gi|16802079	0.57	0	SAAG_01378T0	0.17	0	TBCT_01119.1	0.55	0	CAWT_03642	0.17	0	HCAG_03264T0
	AF034	Legume lectin	P05045	Dol b Agglutinin	275	A	no	21	16979126	Bm1_42335	2	0	LOAG_08129T0	0.33	0	WUBG_05151T0	0.76	0	Smp_056060	7.2	0	psu|PFB0460c	1.4	0	Tc00.1047053511435.30	2.2	0	psu|LmjF36.3990	1.7	0	gb|TGME49_020910	0.059	0	ECCG_00822T0	1.6	0	gi|16802756	0.75	0	SAAG_00476T0	0.65	0	TBCT_01190.1	0.33	0	CAWT_02943	0.012	0	HCAG_07520T0
	AF034	Legume lectin	P05046	Gly m Agglutinin	285	A	no	31	16837790	Bm1_47150	0.32	0	LOAG_07626T0	0.053	0	WUBG_02372T0	0.073	0	Smp_102330	2	0	psu|PFB0680w	1.4	0	Tc00.1047053509563.30	1	0	psu|LmjF13.0670	0.21	0	gb|TGME49_088000	4.5	0	ECCG_01787T0	1.3	0	gi|16803955	1	0	SAAG_01285T0	0.081	0	TBCT_03321.1	1.3	0	CAWT_01077	2	0	HCAG_08338T0
	AF034	Legume lectin	Q8RVY1	Pha v PHA	275	A	NA			Bm1_05480	2.6	0	LOAG_09325T0	2.1	0	WUBG_02485T0	0.45	0	Smp_165140.3	0.22	0	psu|MAL13P1.475	1	0	Tc00.1047053505949.20	0.75	0	psu|LmjF18.1110	0.34	0	gb|TGME49_054450	0.23	0	ECCG_02959T0	0.049	0	gi|16803565	1.7	0	SAAG_00465T0	1.9	0	TBCT_03283.1	1.2	0	CAWT_03173	0.39	0	HCAG_02086T0
	AF035	Peroxidase	Q42661	Cap a 30kD	250	P	NA			Bm1_38750	0.6	0	LOAG_11945T0	1.9	0	WUBG_07016T0	1.1	0	Smp_164630	53	0	psu|PF07_0035	7.7	0	Tc00.1047053503745.30	9e-48	39	psu|LmjF34.0070	2e-49	43	gb|TGME49_094580	0.97	0	ECCG_04505T0	4e-15	25	gi|16804891	1.1	0	SAAG_02471T0	6.4	0	TBCT_01860.1	1e-11	27	CAWT_04474	9e-45	42	HCAG_08658T0
	AF035	Peroxidase	P15003	Lyc e Peroxidase	364	P	yes	67	12843657	Bm1_43170	3.8	0	LOAG_09057T0	1.8	0	WUBG_02941T0	1.9	0	Smp_154850	8.3	0	psu|PF10_0184	0.08	0	Tc00.1047053503745.30	0.002	0	psu|LmjF34.0070	1e-08	24	gb|TGME49_078510	3.7	0	ECCG_00502T0	0.46	0	gi|16803587	2.4	0	SAAG_00476T0	0.14	0	TBCT_02877.1	0.21	0	CAWT_02572	0.0001	0	HCAG_08658T0
	AF035	Peroxidase	P15984	Tri a Bd36K	80	P	NA			Bm1_47740	4	0	LOAG_10840T0	6	0	WUBG_10665T0	3.2	0	Smp_141580	1.8	0	psu|PF11_0432	2.3	0	Tc00.1047053503745.30	0.38	0	psu|LmjF34.0070	0.2	0	gb|TGME49_014960	0.036	0	ECCG_03786T0	0.62	0	gi|16803674	2.4	0	SAAG_02462T0	1.6	0	TBCT_01073.1	1.1	0	CAWT_04474	0.42	0	HCAG_11289T0
	AF036	Calcineurin-like phosphoesterase	P50635	Aed a 1	562	A	yes	32	11717185	Bm1_12160	0.04	0	LOAG_08916T0	1.8	0	WUBG_09941T0	0.48	0	Smp_194100	2e-09	24	psu|PFE0450w	0.047	0	Tc00.1047053508219.20	1.5	0	psu|LmjF09.1510	1.4	0	gb|TGME49_039620	2e-07	22	ECCG_03433T0	8e-19	22	gi|16802178	1e-16	21	SAAG_00563T0	9e-25	24	TBCT_03835.1	1.3	0	CAWT_03628	0.25	0	HCAG_08616T0
	AF037	Lipase	Q06478	Dol m 1	317	A	yes	66	3989146	Bm1_32230	0.058	0	LOAG_14103T0	0.52	0	WUBG_04233T0	0.19	0	Smp_131890	3.1	0	psu|PFA0590w	0.25	0	Tc00.1047053511733.60	1.6	0	psu|LmjF15.0330	5.9	0	gb|TGME49_105330	0.8	0	ECCG_02074T0	0.5	0	gi|16803982	0.23	0	SAAG_02577T0	2.3	0	TBCT_00265.1	1.1	0	CAWT_00545	0.48	0	HCAG_06281T0
	AF037	Lipase	Q9U6W0	Pol a 1	301	A	NA			Bm1_00660	0.78	0	LOAG_00968T0	1.8	0	WUBG_17090T0	0.3	0	Smp_181030	8.3	0	psu|MAL8P1.105	0.01	0	Tc00.1047053510901.100	3.2	0	psu|LmjF28.1780	1.5	0	gb|TGME49_092020	0.26	0	ECCG_04418T0	20	0	gi|16803685	0.38	0	SAAG_01692T0	0.15	0	TBCT_03085.1	0.37	0	CAWT_00853	0.76	0	HCAG_11331T0
	AF037	Lipase	Q6Q252	Pol d 1	337	A	yes	100	2051020	Bm1_45395	0.53	0	LOAG_03930T0	0.96	0	WUBG_04392T0	0.58	0	Smp_181030	5.7	0	psu|PF11_0153	0.073	0	Tc00.1047053511733.60	2.2	0	psu|LmjF28.1780	2.2	0	gb|TGME49_092020	0.3	0	ECCG_02810T0	3.5	0	gi|16804049	1.7	0	SAAG_02155T0	0.65	0	TBCT_03085.1	1.2	0	CAWT_05228	0.4	0	HCAG_02795T0
	AF037	Lipase	A2VBC4	Poly p 1	322	A	NA			Bm1_29165	4.2	0	LOAG_06948T0	0.063	0	WUBG_17090T0	0.72	0	Smp_174470	20	0	psu|PF14_0234	0.12	0	Tc00.1047053507603.110	1.6	0	psu|LmjF36.5610	3.6	0	gb|TGME49_092020	0.48	0	ECCG_03791T0	4.3	0	gi|16803136	1.6	0	SAAG_02416T0	0.8	0	TBCT_03085.1	0.14	0	CAWT_00853	0.37	0	HCAG_00770T0
	AF037	Lipase	Q68KK0	Sol I 1	346	A	yes	86	3192865	Bm1_24670	7.9	0	LOAG_05847T0	1.7	0	WUBG_12552T0	5.1	0	Smp_164390	0.92	0	psu|PF10_0331	0.02	0	Tc00.1047053507089.130	3.9	0	psu|LmjF11.0840	6.7	0	gb|TGME49_094550	1.2	0	ECCG_02194T0	0.56	0	gi|16803433	11	0	SAAG_00075T0	7.4	0	TBCT_00676.1	0.98	0	CAWT_02426	0.18	0	HCAG_10653T0
	AF037	Lipase	Q3ZU95	Ves g 1	300	A	NA			Bm1_22815	1.7	0	LOAG_05225T0	0.057	0	WUBG_15907T0	0.38	0	Smp_141540	0.001	0	psu|PF14_0236	0.062	0	Tc00.1047053510901.100	0.38	0	psu|LmjF07.0720	4.2	0	gb|TGME49_040910	2.8	0	ECCG_04528T0	1.3	0	gi|16804886	0.29	0	SAAG_02456T0	1.3	0	TBCT_01784.1	0.22	0	CAWT_02426	0.26	0	HCAG_02453T0
	AF037	Lipase	P51528	Ves m 1	300	A	no	46	6736487	Bm1_43875	3	0	LOAG_05225T0	0.17	0	WUBG_01727T0	0.86	0	Smp_141540	0.023	0	psu|PF14_0236	0.31	0	Tc00.1047053510901.100	0.17	0	psu|LmjF34.3680	0.5	0	gb|TGME49_081440	2.2	0	ECCG_02821T0	1.8	0	gi|16804115	1.1	0	SAAG_01077T0	0.067	0	TBCT_03634.1	1.8	0	CAWT_05162	0.2	0	HCAG_10021T0
	AF037	Lipase	P49369	Ves v 1	336	A	yes	58	12403934	Bm1_24440	3.4	0	LOAG_05225T0	0.33	0	WUBG_15907T0	2.2	0	Smp_141540	0.002	0	psu|PF14_0236	0.073	0	Tc00.1047053510901.100	0.34	0	psu|LmjF36.2150	0.99	0	gb|TGME49_040910	4.3	0	ECCG_02821T0	2	0	gi|16802496	0.43	0	SAAG_02456T0	1.5	0	TBCT_01784.1	0.33	0	CAWT_02426	0.18	0	HCAG_02453T0
	AF038	Cyclophilin	Q4WWX5	Asp f 27	163	F	yes	75	16483252	Bm1_55850	4e-63	67	LOAG_06740T0	9e-63	67	WUBG_03184T0	4e-63	67	Smp_094810	9e-57	63	psu|PFC0975c	2e-57	62	Tc00.1047053509215.40	1e-57	62	psu|LmjF25.0910	2e-58	64	gb|TGME49_005700	6e-60	65	ECCG_03476T0	5e-12	32	gi|16804414	2e-28	46	SAAG_01307T0	4e-24	42	TBCT_00009.1	3e-22	47	CAWT_05587	1e-69	75	HCAG_04485T0
	AF038	Cyclophilin	P81531	Bet v 7	42	P	no	20	10669849	Bm1_55850	1e-11	70	LOAG_06740T0	2e-11	70	WUBG_03184T0	1e-10	68	Smp_094810	1e-06	0	psu|PFC0975c	2e-07	58	Tc00.1047053509215.40	1e-08	61	psu|LmjF33.1630	2e-09	63	gb|TGME49_005700	7e-08	61	ECCG_02891T0	8.8	0	gi|16804414	2e-05	0	SAAG_01307T0	0.0002	0	TBCT_00009.1	0.001	0	CAWT_05587	2e-08	61	HCAG_04485T0
	AF039	Ribosome inactivating protein	Q70US9	Ade v RIP	523	P	NA		12417892	Bm1_20125	2	0	LOAG_08508T0	0.56	0	WUBG_13321T0	1.3	0	Smp_005500	3.5	0	psu|PFB0161c	2.4	0	Tc00.1047053507521.140	0.78	0	psu|LmjF36.2580	2.3	0	gb|TGME49_042620	22	0	ECCG_02450T0	0.7	0	gi|16804096	0.43	0	SAAG_02117T0	9.3	0	TBCT_03353.1	1.6	0	CAWT_02093	2	0	HCAG_04202T0
	AF039	Ribosome inactivating protein	P24476	Dia c RIP	293	P	NA		16238796	Bm1_56935	0.26	0	LOAG_02100T0	0.36	0	WUBG_13000T0	1.1	0	Smp_103540.2	14	0	psu|PFL1930w	0.001	0	Tc00.1047053504155.20	1.1	0	psu|LmjF34.3220	0.057	0	gb|TGME49_078110	4.7	0	ECCG_02600T0	1.7	0	gi|16804227	0.62	0	SAAG_01500T0	0.14	0	TBCT_03672.1	2.3	0	CAWT_02495	0.11	0	HCAG_01146T0
	AF039	Ribosome inactivating protein	P33186	Gel m RIP	316	P	NA		16238796	Bm1_08205	1.8	0	LOAG_11214T0	0.68	0	WUBG_18561T0	1.6	0	Smp_126970	1	0	psu|PFB0815w	2.8	0	Tc00.1047053508173.120	0.31	0	psu|LmjF28.0620	4.5	0	gb|TGME49_027900	1.8	0	ECCG_00037T0	0.5	0	gi|16802591	0.31	0	SAAG_02056T0	1	0	TBCT_00897.1	3.3	0	CAWT_00993	4	0	HCAG_08432T0
	AF039	Ribosome inactivating protein	P16094	Mom c RIP	286	P	NA			Bm1_31300	6.1	0	LOAG_08366T0	0.27	0	WUBG_01005T0	5.2	0	Smp_172400	4.5	0	psu|PFI0735c	0.38	0	Tc00.1047053509219.20	1.8	0	psu|LmjF36.4620	1.4	0	gb|TGME49_089080	5.9	0	ECCG_00140T0	0.2	0	gi|16802376	1	0	SAAG_02585T0	0.24	0	TBCT_01251.1	0.041	0	CAWT_01949	3.5	0	HCAG_03880T0
	AF039	Ribosome inactivating protein	Q8S946	Phy a RIP	262	P	NA			Bm1_31750	0.034	0	LOAG_10573T0	0.062	0	WUBG_00271T0	0.93	0	Smp_158760	1.4	0	psu|PFF1260c	0.087	0	Tc00.1047053503855.50	10	0	psu|LmjF34.1550	4.5	0	gb|TGME49_002780	0.36	0	ECCG_01312T0	1.5	0	gi|16802583	0.91	0	SAAG_02540T0	3.1	0	TBCT_03130.1	5.8	0	CAWT_05244	0.16	0	HCAG_06081T0
	AF039	Ribosome inactivating protein	P02879	Ric c RIP	576	P	NA			Bm1_02810	0.014	0	LOAG_08508T0	0.057	0	WUBG_13197T0	0.058	0	Smp_159490	0.16	0	psu|PF14_0532	1.2	0	Tc00.1047053508023.140	0.88	0	psu|LmjF25.0610	4.3	0	gb|TGME49_085250	3.8	0	ECCG_00836T0	0.071	0	gi|16804889	3.1	0	SAAG_01787T0	4.6	0	TBCT_03464.1	0.12	0	CAWT_03541	0.12	0	HCAG_01538T0
	AF039	Ribosome inactivating protein	P20656	Sap o RIP	299	P	NA			Bm1_45245	2.9	0	LOAG_06258T0	0.22	0	WUBG_01495T0	1.5	0	Smp_076500	2.8	0	psu|PFL1930w	0.007	0	Tc00.1047053508461.70	0.65	0	psu|LmjF07.1080	0.17	0	gb|TGME49_008370	0.19	0	ECCG_01892T0	0.46	0	gi|16803243	0.17	0	SAAG_00848T0	0.96	0	TBCT_02041.1	0.074	0	CAWT_03821	0.34	0	HCAG_08385T0
	AF040	Aldehyde dehydrogenase	P42041	Alt a 10	497	F	no	2	7898496	Bm1_28330	1e-79	34	LOAG_02927T0	4e-82	36	WUBG_00437T0	5e-80	34	Smp_022960	1e-150	54	psu|PF10_0335	3.8	0	Tc00.1047053507641.60	2e-75	35	psu|LmjF25.1120	1e-138	51	gb|TGME49_022160	1e-123	47	ECCG_01791T0	1e-108	42	gi|16802954	2e-85	36	SAAG_00650T0	1e-112	43	TBCT_00449.1	2e-97	42	CAWT_04064	1e-154	54	HCAG_08367T0
	AF040	Aldehyde dehydrogenase	P40108	Cla h 10	496	F	no	36	7898496	Bm1_28330	1e-84	36	LOAG_02927T0	1e-87	37	WUBG_00437T0	1e-84	36	Smp_022960	1e-149	54	psu|PFE0420c	1.3	0	Tc00.1047053507641.60	2e-75	36	psu|LmjF25.1120	1e-136	52	gb|TGME49_022160	1e-126	49	ECCG_01791T0	1e-106	42	gi|16802954	2e-87	37	SAAG_00432T0	1e-112	44	TBCT_00449.1	4e-94	41	CAWT_04064	1e-160	55	HCAG_08367T0
	AF042	Heat shock protein Hsp90	P40292	Asp f 12	706	F	NA			Bm1_51495	0	61	LOAG_00073T0	0	64	WUBG_00965T0	0	65	Smp_072330.2	0	61	psu|PF07_0029	0	60	Tc00.1047053509643.130	0	63	psu|LmjF33.0365	0	62	gb|TGME49_088380	0	63	ECCG_03425T0	1e-127	38	gi|16802982	2e-21	22	SAAG_00768T0	3e-05	0	TBCT_02241.1	1e-126	38	CAWT_05553	0	76	HCAG_04686T0
	AF043	Hevein-like domain	Q5NTA4	Cry j chitinase	281	P	yes	100	15725197	Bm1_52290	0.002	0	LOAG_12218T0	0.068	0	WUBG_12302T0	0.35	0	Smp_169430	0.18	0	psu|PF13_0053	1.8	0	Tc00.1047053506789.50	0.003	0	psu|LmjF31.2540	0.2	0	gb|TGME49_093770	1e-09	33	ECCG_04264T0	0.013	0	gi|16804542	2.2	0	SAAG_01224T0	5.7	0	TBCT_02299.1	0.04	0	CAWT_04023	0.0005	0	HCAG_07266T0
	AF043	Hevein-like domain	Q949H3	Hev b 11	295	P	no	15	21095007	Bm1_21255	0.76	0	LOAG_12756T0	0.033	0	WUBG_14719T0	0.38	0	Smp_160620.1	4.7	0	psu|PFL0410w	9.7	0	Tc00.1047053511211.220	0.83	0	psu|LmjF31.0790	1.8	0	gb|TGME49_093770	2e-08	33	ECCG_01118T0	2.2	0	gi|16803936	0.82	0	SAAG_00319T0	0.55	0	TBCT_02999.1	1.4	0	CAWT_00152	0.087	0	HCAG_07266T0
	AF043	Hevein-like domain	P93680	Pers a 1	326	P	yes	75	9774427	Bm1_48015	1.9	0	LOAG_07012T0	0.11	0	WUBG_12302T0	1.2	0	Smp_146950	0.64	0	psu|PFL1240c	3.8	0	Tc00.1047053506859.160	2.8	0	psu|LmjF20.1510	0.43	0	gb|TGME49_093770	5e-07	23	ECCG_04528T0	1.2	0	gi|16802217	2.7	0	SAAG_00595T0	4.1	0	TBCT_03659.1	0.7	0	CAWT_02505	3.2	0	HCAG_07266T0
	AF044	CRISP/PR-1/venom group 5 allergen family	A6GVD5	Ara h 6	162	P	yes	58	17521730	Bm1_34090	7e-14	34	LOAG_03326T0	1e-12	34	WUBG_00121T0	4e-12	34	Smp_123550	6e-14	34	psu|MAL7P1.339	4e-05	0	Tc00.1047053509967.90	3.4	0	psu|LmjF04.1050	5.9	0	gb|TGME49_020280	4e-11	32	ECCG_02986T0	2.1	0	gi|16804095	1.7	0	SAAG_01274T0	1.2	0	TBCT_03507.1	1.3	0	CAWT_00042	7e-19	37	HCAG_07979T0
	AF044	CRISP/PR-1/venom group 5 allergen family	Q05108	Dol a 5	203	A	yes	100	IUIS	Bm1_14045	1e-20	33	LOAG_11328T0	7e-18	33	WUBG_12397T0	1e-20	33	Smp_123550	2e-20	36	psu|PF11_0060	0.059	0	Tc00.1047053506619.90	0.8	0	psu|LmjF30.3450	0.47	0	gb|TGME49_020280	1e-08	24	ECCG_03214T0	1.7	0	gi|16803669	0.49	0	SAAG_00567T0	0.73	0	TBCT_01238.1	2.4	0	CAWT_00714	6e-08	28	HCAG_09995T0
	AF044	CRISP/PR-1/venom group 5 allergen family	P35781	Dol m 5	202	A	yes	100	3989146	Bm1_14045	7e-23	33	LOAG_11328T0	2e-18	31	WUBG_12397T0	3e-21	33	Smp_159290	3e-21	40	psu|MAL7P1.339	0.034	0	Tc00.1047053508719.80	0.032	0	psu|LmjF34.2100	0.12	0	gb|TGME49_039890	2e-07	29	ECCG_03078T0	3.8	0	gi|16803669	0.49	0	SAAG_02077T0	0.56	0	TBCT_00580.1	8.9	0	CAWT_00042	5e-10	31	HCAG_01091T0
	AF044	CRISP/PR-1/venom group 5 allergen family	C0ITL3	Pac c 3	199	A	yes	100	19178543	Bm1_14040	1e-16	32	LOAG_11328T0	5e-13	28	WUBG_12397T0	1e-17	32	Smp_154260	3e-18	34	psu|MAL13P1.26	0.82	0	Tc00.1047053506671.10	0.12	0	psu|LmjF01.0460	0.2	0	gb|TGME49_039890	3e-06	0	ECCG_03598T0	2.9	0	gi|16802545	3.1	0	SAAG_02562T0	2.1	0	TBCT_01749.1	1.8	0	CAWT_00042	6e-10	27	HCAG_10727T0
	AF044	CRISP/PR-1/venom group 5 allergen family	Q05109	Pol a 5	209	A	NA			Bm1_34090	5e-16	30	LOAG_03326T0	3e-15	30	WUBG_12397T0	1e-15	29	Smp_002630	2e-18	36	psu|PFI1485c	0.31	0	Tc00.1047053510997.10	0.098	0	psu|LmjF20.1500	0.64	0	gb|TGME49_020280	1e-09	31	ECCG_03986T0	0.48	0	gi|16803755	1.1	0	SAAG_01671T0	2.2	0	TBCT_02854.1	1.5	0	CAWT_00712	3e-09	30	HCAG_00689T0
	AF044	CRISP/PR-1/venom group 5 allergen family	Q68KJ8	Pol d 5	227	A	NA			Bm1_14035	2e-15	32	LOAG_11328T0	3e-14	28	WUBG_12397T0	1e-15	29	Smp_159290	1e-18	34	psu|PFE1640w	0.008	0	Tc00.1047053511867.130	2.8	0	psu|LmjF11.0160	4.8	0	gb|TGME49_020280	6e-09	30	ECCG_01390T0	0.54	0	gi|16802133	2.2	0	SAAG_01671T0	0.3	0	TBCT_00991.1	2.8	0	CAWT_00712	2e-08	29	HCAG_06189T0
	AF044	CRISP/PR-1/venom group 5 allergen family	Q68KJ9	Pol e 5	226	A	yes	89	3989146	Bm1_34090	4e-15	30	LOAG_03326T0	2e-14	30	WUBG_09134T0	7e-15	32	Smp_120670	1e-17	41	psu|PFD1115c	0.35	0	Tc00.1047053510997.10	0.15	0	psu|LmjF20.1500	0.73	0	gb|TGME49_020280	8e-09	33	ECCG_03986T0	0.41	0	gi|16804547	4.8	0	SAAG_01671T0	2.5	0	TBCT_02854.1	1.6	0	CAWT_00712	4e-09	30	HCAG_06189T0
	AF044	CRISP/PR-1/venom group 5 allergen family	P35780	Pol f 5	205	A	NA		7065471	Bm1_18505	6e-14	31	LOAG_03326T0	4e-14	29	WUBG_09134T0	1e-14	32	Smp_159290	2e-19	36	psu|PFI1485c	0.3	0	Tc00.1047053508277.140	2.4	0	psu|LmjF23.1310	1.8	0	gb|TGME49_020280	8e-10	32	ECCG_00965T0	3	0	gi|16803755	2.4	0	SAAG_01671T0	3.7	0	TBCT_00112.1	0.63	0	CAWT_00712	3e-08	29	HCAG_01586T0
	AF044	CRISP/PR-1/venom group 5 allergen family	P83377	Pol g 5	206	A	NA			Bm1_14035	5e-15	32	LOAG_11328T0	1e-13	28	WUBG_12397T0	8e-15	29	Smp_159290	5e-18	34	psu|PFE1640w	0.003	0	Tc00.1047053506893.70	1.8	0	psu|LmjF11.0160	4.1	0	gb|TGME49_020280	2e-09	31	ECCG_01390T0	1.4	0	gi|16802786	1.9	0	SAAG_02410T0	1.3	0	TBCT_00991.1	2.4	0	CAWT_00712	8e-08	29	HCAG_06189T0
	AF044	CRISP/PR-1/venom group 5 allergen family	Q7Z156	Poly s 5	207	A	NA			Bm1_18505	1e-14	30	LOAG_03326T0	3e-14	27	WUBG_09134T0	6e-15	30	Smp_159290	8e-18	35	psu|MAL7P1.339	0.4	0	Tc00.1047053511867.130	4.1	0	psu|LmjF26.0700	1.1	0	gb|TGME49_020280	1e-09	33	ECCG_03323T0	6.8	0	gi|16803377	1.1	0	SAAG_00889T0	0.44	0	TBCT_02611.1	5.4	0	CAWT_00712	1e-08	29	HCAG_06189T0
	AF044	CRISP/PR-1/venom group 5 allergen family	P35778	sol i 3	234	A	yes	60	3192865	Bm1_14045	2e-19	36	LOAG_11328T0	5e-16	30	WUBG_12397T0	5e-21	36	Smp_123550	9e-17	35	psu|MAL7P1.339	0.009	0	Tc00.1047053511657.50	3.8	0	psu|LmjF32.1930	2.2	0	gb|TGME49_039890	3e-07	30	ECCG_01164T0	0.067	0	gi|16804614	1.3	0	SAAG_01658T0	0.53	0	TBCT_02854.1	1.3	0	CAWT_00042	2e-10	27	HCAG_10782T0
	AF044	CRISP/PR-1/venom group 5 allergen family	P35779	sol r 3	211	A	NA			Bm1_14045	4e-20	37	LOAG_11328T0	5e-17	31	WUBG_12397T0	2e-20	35	Smp_123550	9e-17	35	psu|MAL7P1.339	0.01	0	Tc00.1047053506859.80	3.2	0	psu|LmjF32.1930	1.9	0	gb|TGME49_020280	2e-07	30	ECCG_01164T0	0.29	0	gi|16804793	0.88	0	SAAG_00979T0	0.6	0	TBCT_00192.1	0.86	0	CAWT_00714	5e-11	30	HCAG_10782T0
	AF044	CRISP/PR-1/venom group 5 allergen family	P35783	Ves f 5	204	A	NA			Bm1_14045	2e-17	29	LOAG_14391T0	6e-15	38	WUBG_12397T0	3e-18	30	Smp_123550	2e-19	36	psu|MAL7P1.339	0.012	0	Tc00.1047053508719.80	0.28	0	psu|LmjF18.0860	6.8	0	gb|TGME49_020280	1e-06	0	ECCG_02946T0	0.35	0	gi|16803669	0.007	0	SAAG_01976T0	0.97	0	TBCT_02897.1	3.1	0	CAWT_00042	5e-08	32	HCAG_00085T0
	AF044	CRISP/PR-1/venom group 5 allergen family	P35784	Ves g 5	204	A	NA			Bm1_14045	3e-18	31	LOAG_14391T0	7e-16	40	WUBG_12397T0	4e-19	31	Smp_159290	1e-18	34	psu|MAL7P1.339	0.005	0	Tc00.1047053508719.80	0.21	0	psu|LmjF33.2590	8.9	0	gb|TGME49_020280	9e-07	33	ECCG_02946T0	1.3	0	gi|16802248	0.004	0	SAAG_01976T0	1.3	0	TBCT_02897.1	1.1	0	CAWT_00042	2e-09	33	HCAG_00085T0
	AF044	CRISP/PR-1/venom group 5 allergen family	Q2L6Z1	Ves m 5	227	A	no	8	6736487	Bm1_14045	5e-18	32	LOAG_14391T0	2e-16	40	WUBG_12397T0	5e-18	30	Smp_002630	8e-20	38	psu|MAL7P1.339	0.004	0	Tc00.1047053508719.80	0.19	0	psu|LmjF27.0470	0.56	0	gb|TGME49_020280	5e-07	28	ECCG_02946T0	0.037	0	gi|16802248	0.001	0	SAAG_01834T0	1.1	0	TBCT_02897.1	0.56	0	CAWT_00042	3e-08	32	HCAG_00085T0
	AF044	CRISP/PR-1/venom group 5 allergen family	P35785	Ves p 5	204	A	NA			Bm1_14045	2e-17	30	LOAG_14391T0	2e-15	38	WUBG_12397T0	4e-18	30	Smp_002630	2e-19	37	psu|MAL7P1.339	0.009	0	Tc00.1047053508719.80	0.47	0	psu|LmjF33.1570	6.8	0	gb|TGME49_020280	3e-07	33	ECCG_02946T0	2.3	0	gi|16802248	0.007	0	SAAG_02028T0	0.013	0	TBCT_00574.1	6.9	0	CAWT_00042	1e-08	31	HCAG_00085T0
	AF044	CRISP/PR-1/venom group 5 allergen family	P35786	Ves s 5	205	A	yes	87	19120073	Bm1_14045	4e-19	31	LOAG_11328T0	2e-15	31	WUBG_12397T0	5e-20	32	Smp_002630	5e-21	38	psu|MAL7P1.108	0.007	0	Tc00.1047053509569.140	0.81	0	psu|LmjF32.3730	0.36	0	gb|TGME49_020280	2e-06	0	ECCG_03640T0	0.27	0	gi|16803636	0.076	0	SAAG_01791T0	0.023	0	TBCT_00417.1	3.1	0	CAWT_00712	1e-09	31	HCAG_06116T0
	AF044	CRISP/PR-1/venom group 5 allergen family	Q05110	Ves v 5	227	A	yes	84	12403934	Bm1_14045	5e-18	29	LOAG_11328T0	7e-15	29	WUBG_12397T0	4e-19	31	Smp_123550	5e-19	37	psu|MAL7P1.339	0.041	0	Tc00.1047053508719.80	0.25	0	psu|LmjF35.1860	14	0	gb|TGME49_020280	2e-06	0	ECCG_02946T0	0.54	0	gi|16803669	0.008	0	SAAG_00981T0	2.5	0	TBCT_02897.1	3.6	0	CAWT_00042	3e-08	31	HCAG_00085T0
	AF044	CRISP/PR-1/venom group 5 allergen family	P35787	Ves vi 5	206	A	NA			Bm1_14045	1e-18	32	LOAG_11328T0	2e-13	29	WUBG_12397T0	6e-18	30	Smp_002630	2e-23	40	psu|PF13_0271	0.016	0	Tc00.1047053510265.70	0.63	0	psu|LmjF27.2300	9.1	0	gb|TGME49_020280	1e-06	0	ECCG_02946T0	1.4	0	gi|16803636	0.1	0	SAAG_00325T0	0.34	0	TBCT_02897.1	0.64	0	CAWT_00042	2e-07	31	HCAG_05952T0
	AF044	CRISP/PR-1/venom group 5 allergen family	P35782	Vesp c 5	202	A	NA			Bm1_14045	2e-23	35	LOAG_11328T0	1e-18	32	WUBG_12397T0	1e-21	34	Smp_159290	3e-21	40	psu|MAL7P1.339	0.009	0	Tc00.1047053508719.80	0.032	0	psu|LmjF34.3880	5.2	0	gb|TGME49_020280	2e-06	0	ECCG_03640T0	0.59	0	gi|16803669	0.49	0	SAAG_00227T0	1.2	0	TBCT_02897.1	5.2	0	CAWT_00714	2e-10	32	HCAG_01091T0
	AF045	Cupin superfamily	Q8L5L6	Ana o 1	536	P	no	50	12110836	Bm1_00515	5e-07	25	LOAG_01196T0	8e-06	0	WUBG_08659T0	0.0001	0	Smp_179810	0.003	0	psu|PFA0620c	6e-09	30	Tc00.1047053510269.20	6e-06	0	psu|LmjF28.2210	0.0003	0	gb|TGME49_028700	9e-09	25	ECCG_02317T0	0.065	0	gi|16804112	0.04	0	SAAG_01643T0	0.012	0	TBCT_02679.1	0.19	0	CAWT_04217	9e-07	22	HCAG_08305T0
	AF045	Cupin superfamily	Q8GZP6	Ana o 2	457	P	yes	62	14555856	Bm1_51575	0.78	0	LOAG_08508T0	0.098	0	WUBG_14968T0	0.29	0	Smp_157130	0.45	0	psu|PF14_0201	0.022	0	Tc00.1047053509805.70	0.016	0	psu|LmjF29.2090	0.39	0	gb|TGME49_049700	0.04	0	ECCG_01140T0	0.6	0	gi|16802743	0.096	0	SAAG_00661T0	1.2	0	TBCT_02705.1	3.1	0	CAWT_00501	0.018	0	HCAG_00051T0
	AF045	Cupin superfamily	P43238	Ara h 1	626	P	yes	88	7560062	Bm1_47935	0.001	0	LOAG_04358T0	0.01	0	WUBG_13744T0	0.0002	0	Smp_150320	0.39	0	psu|PF14_0404	5e-05	0	Tc00.1047053507937.50	0.039	0	psu|LmjF23.0080	0.023	0	gb|TGME49_027260	0.0002	0	ECCG_02536T0	0.1	0	gi|16803377	1.2	0	SAAG_00133T0	0.011	0	TBCT_00471.1	0.4	0	CAWT_04217	0.009	0	HCAG_01190T0
	AF045	Cupin superfamily	B5TYU1	Ara h 3	530	P	no	50	21093026	Bm1_05690	0.002	0	LOAG_04138T0	0.01	0	WUBG_01961T0	0.006	0	Smp_124910	0.029	0	psu|PF11_0007	0.02	0	Tc00.1047053511855.20	4e-05	0	psu|LmjF19.0440	0.071	0	gb|TGME49_095750	6e-07	18	ECCG_04323T0	0.24	0	gi|16804598	1.3	0	SAAG_01195T0	0.85	0	TBCT_01096.1	0.11	0	CAWT_03329	0.007	0	HCAG_01592T0
	AF045	Cupin superfamily	Q8LKN1	Ara h 3/4	538	P	yes	53	10474031	Bm1_05690	0.0007	0	LOAG_13531T0	0.003	0	WUBG_04698T0	0.004	0	Smp_007630.2	2.1	0	psu|PFI1380c	0.0004	0	Tc00.1047053503947.20	3e-05	0	psu|LmjF09.0500	0.025	0	gb|TGME49_110330	4e-05	0	ECCG_03783T0	0.065	0	gi|16804598	0.34	0	SAAG_02088T0	4.3	0	TBCT_02386.1	0.26	0	CAWT_05445	0.002	0	HCAG_09367T0
	AF045	Cupin superfamily	Q84ND2	Ber e 2	465	P	NA			Bm1_47975	0.21	0	LOAG_07930T0	0.22	0	WUBG_04419T0	0.17	0	Smp_176500	44	0	psu|PF10_0231	2.1	0	Tc00.1047053510825.10	1.2	0	psu|LmjF12.0440	4.4	0	gb|TGME49_092200	0.59	0	ECCG_02603T0	0.27	0	gi|16802710	0.49	0	SAAG_00526T0	0.96	0	TBCT_01238.1	2.4	0	CAWT_03018	0.35	0	HCAG_06543T0
	AF045	Cupin superfamily	Q8W1C2	Cor a 9	515	P	yes	86	12209105	Bm1_05690	7e-06	0	LOAG_06076T0	0.0002	0	WUBG_06449T0	0.0004	0	Smp_160670	4e-05	0	psu|MAL8P1.154	8e-06	0	Tc00.1047053506999.140	0.002	0	psu|LmjF23.0640	0.003	0	gb|TGME49_086160	4e-06	0	ECCG_01499T0	0.69	0	gi|16804422	0.006	0	SAAG_02088T0	0.002	0	TBCT_02831.1	0.92	0	CAWT_01817	0.0003	0	HCAG_03451T0
	AF045	Cupin superfamily	O23878	Fag e 1	565	P	yes	68	11097313	Bm1_24560	1e-05	0	LOAG_10695T0	8e-09	24	WUBG_06736T0	1e-05	0	Smp_170030	0.004	0	psu|MAL8P1.150	1e-06	0	Tc00.1047053509287.80	2e-10	51	psu|LmjF14.1120	0.0001	0	gb|TGME49_012860	2e-08	20	ECCG_01499T0	0.09	0	gi|16803155	0.21	0	SAAG_01643T0	0.083	0	TBCT_03300.1	2.3	0	CAWT_04671	8e-06	0	HCAG_05342T0
	AF045	Cupin superfamily	Q9SEW4	Jug r 2	593	P	yes	60	10589017	Bm1_00515	1e-18	25	LOAG_10695T0	5e-15	28	WUBG_08659T0	9e-11	27	Smp_035310	3e-07	22	psu|PF11_0035	4e-16	24	Tc00.1047053510649.24	3e-15	26	psu|LmjF29.0110	2e-12	25	gb|TGME49_086160	4e-16	26	ECCG_01499T0	2e-07	25	gi|16802352	0.22	0	SAAG_01195T0	6e-05	0	TBCT_02860.1	1.8	0	CAWT_00248	2e-09	23	HCAG_05215T0
	AF045	Cupin superfamily	Q84UI1	Len c 1	418	P	yes	68	11080720	Bm1_02975	0.028	0	LOAG_10067T0	0.001	0	WUBG_02158T0	0.001	0	Smp_088950	0.037	0	psu|PFE0320w	6e-06	0	Tc00.1047053510275.190	0.005	0	psu|LmjF34.2530	0.26	0	gb|TGME49_054820	0.0003	0	ECCG_01541T0	1.6	0	gi|16802757	0.008	0	SAAG_02593T0	0.077	0	TBCT_02667.1	1.2	0	CAWT_04425	2e-05	0	HCAG_06374T0
	AF045	Cupin superfamily	B8Q5G0	Lup a 1	611	P	yes	58	19236410	Bm1_05690	2e-22	35	LOAG_10695T0	2e-18	29	WUBG_08659T0	4e-13	26	Smp_179810	3e-09	25	psu|MAL7P1.129	3e-17	31	Tc00.1047053503865.60	3e-14	26	psu|LmjF23.0640	8e-13	30	gb|TGME49_067600	1e-20	33	ECCG_01499T0	3e-10	26	gi|16804422	0.0008	0	SAAG_01195T0	2e-06	0	TBCT_01096.1	0.046	0	CAWT_04684	6e-15	20	HCAG_05215T0
	AF045	Cupin superfamily	B7P073	Pis v 2	496	P	yes	50	19522997	Bm1_00515	0.001	0	LOAG_06076T0	0.001	0	WUBG_00515T0	0.006	0	Smp_143900	0.012	0	psu|PF13_0198	0.006	0	Tc00.1047053511823.14	0.006	0	psu|LmjF23.0640	0.05	0	gb|TGME49_019660	0.0008	0	ECCG_03007T0	0.29	0	gi|16804319	0.31	0	SAAG_01744T0	0.27	0	TBCT_02987.1	3.4	0	CAWT_04327	0.005	0	HCAG_02346T0
	AF045	Cupin superfamily	B4X640	Pis v 3	519	P	no	37	18479490	Bm1_53245	2e-08	23	LOAG_10695T0	5e-07	24	WUBG_01534T0	1e-06	0	Smp_179810	0.001	0	psu|PFC0570c	3e-08	29	Tc00.1047053510269.20	7e-07	28	psu|LmjF23.0640	0.0001	0	gb|TGME49_028700	8e-10	29	ECCG_01499T0	0.53	0	gi|16804422	0.086	0	SAAG_01195T0	0.004	0	TBCT_00507.1	3.5	0	CAWT_04684	1e-08	27	HCAG_05215T0
	AF045	Cupin superfamily	B7SLJ1	Pis v 5	473	P	NA			Bm1_01325	0.096	0	LOAG_07428T0	0.23	0	WUBG_00515T0	0.1	0	Smp_127010	4	0	psu|PF13_0076	0.19	0	Tc00.1047053511661.10	0.18	0	psu|LmjF12.0350	0.24	0	gb|TGME49_089220	0.055	0	ECCG_03346T0	0.81	0	gi|16804766	0.85	0	SAAG_01658T0	0.98	0	TBCT_00674.1	2.4	0	CAWT_00501	0.001	0	HCAG_04054T0
	AF045	Cupin superfamily	Q2TLV9	Sin a 2	523	P	no	44	17349683	Bm1_03680	1e-10	39	LOAG_11354T0	7e-15	55	WUBG_06442T0	8e-08	57	Smp_159380	5e-05	0	psu|PF10_0265	1e-14	42	Tc00.1047053504047.50	6e-06	0	psu|LmjF13.0670	9e-08	43	gb|TGME49_114360	3e-05	0	ECCG_01312T0	0.002	0	gi|16803438	1.6	0	SAAG_02088T0	0.13	0	TBCT_01279.1	0.017	0	CAWT_03678	7e-11	57	HCAG_03773T0
	AF046	Kunitz soybean trypsin inhibitor family	P16348	Sol t 2	188	P	yes	51	11421919	Bm1_33340	0.39	0	LOAG_05400T0	2	0	WUBG_11262T0	1.7	0	Smp_040350	8.4	0	psu|PF08_0115	2.2	0	Tc00.1047053509159.10	2.6	0	psu|LmjF10.0390	0.24	0	gb|TGME49_002080	1.4	0	ECCG_00193T0	2	0	gi|16803360	0.96	0	SAAG_00756T0	1.1	0	TBCT_03744.1	2.8	0	CAWT_04757	5.4	0	HCAG_08949T0
	AF046	Kunitz soybean trypsin inhibitor family	P30941	Sol t 4	221	P	yes	67	11421919	Bm1_09230	4.2	0	LOAG_09578T0	0.41	0	WUBG_16215T0	2.8	0	Smp_127000.2	11	0	psu|PFD1245c	18	0	Tc00.1047053511819.59	2.7	0	psu|LmjF10.0390	0.71	0	gb|TGME49_027610	4	0	ECCG_02327T0	0.012	0	gi|16803427	0.72	0	SAAG_00808T0	5.4	0	TBCT_03432.1	4.6	0	CAWT_03835	2.4	0	HCAG_00272T0
	AF047	Catalase	Q2V6Q5	Pen c 30	733	F	no	48	21136777	Bm1_22725	0.21	0	LOAG_12187T0	0.034	0	WUBG_00980T0	0.29	0	Smp_158670	8.9	0	psu|PF11_0418	0.54	0	Tc00.1047053506883.20	0.52	0	psu|LmjF14.0920	5.7	0	gb|TGME49_032250	6e-91	38	ECCG_00251T0	1e-169	46	gi|16804822	1e-102	41	SAAG_01945T0	1e-84	35	TBCT_02408.1	0.21	0	CAWT_00732	5e-83	41	HCAG_07578T0
	AF048	ATP synthase	P13621	Bos d OSCP	213	A	no	31	7797794	Bm1_03855	3e-16	39	LOAG_11071T0	7e-17	41	WUBG_10125T0	2e-12	37	Smp_039000	1e-41	44	psu|MAL13P1.47	3e-21	30	Tc00.1047053504741.250	2.5	0	psu|LmjF27.1390	0.3	0	gb|TGME49_084540	1e-23	35	ECCG_04144T0	6e-15	27	gi|16804570	1e-12	27	SAAG_02319T0	6e-11	19	TBCT_01289.1	1e-08	25	CAWT_02381	3e-30	33	HCAG_03815T0
	AF049	ATP:guanido phosphotransferase	B2ZSY4	Der p 20	356	A	no	15	16890759	Bm1_23610	2e-96	67	LOAG_10519T0	1e-135	64	WUBG_08434T0	1e-138	64	Smp_194770	5e-84	44	psu|PFF0475w	1.9	0	Tc00.1047053507241.30	1e-165	77	psu|LmjF25.2410	4.1	0	gb|TGME49_031610	0.0007	0	ECCG_01722T0	0.15	0	gi|16802277	2e-18	27	SAAG_00941T0	8e-24	26	TBCT_00059.1	5	0	CAWT_02198	0.32	0	HCAG_05646T0
	AF049	ATP:guanido phosphotransferase	Q004B5	Lit v 2	356	A	yes	51	20471069	Bm1_23610	1e-101	70	LOAG_10519T0	1e-139	64	WUBG_08434T0	1e-140	65	Smp_194770	6e-91	48	psu|MAL13P1.88	0.17	0	Tc00.1047053507241.30	1e-160	74	psu|LmjF17.1310	0.37	0	gb|TGME49_031610	1e-06	0	ECCG_01377T0	0.44	0	gi|16802277	3e-15	24	SAAG_00941T0	6e-24	25	TBCT_00908.1	0.45	0	CAWT_01325	0.25	0	HCAG_03480T0
	AF049	ATP:guanido phosphotransferase	Q8I9P7	Pen m 2	356	A	yes	62	18204275	Bm1_23610	1e-102	71	LOAG_10519T0	1e-140	64	WUBG_08434T0	1e-141	66	Smp_194770	6e-88	46	psu|PF10_0232	2.5	0	Tc00.1047053507241.30	1e-159	74	psu|LmjF17.1310	0.48	0	gb|TGME49_031610	3e-06	0	ECCG_01955T0	1.7	0	gi|16802277	4e-15	29	SAAG_00941T0	2e-23	25	TBCT_00908.1	2.3	0	CAWT_00284	0.11	0	HCAG_03480T0
	AF049	ATP:guanido phosphotransferase	A1KY39	Per a 9	356	A	yes	100	16759988	Bm1_23610	2e-91	66	LOAG_10519T0	1e-130	62	WUBG_08434T0	1e-132	63	Smp_194770	4e-88	47	psu|PFF0625w	1.1	0	Tc00.1047053507241.30	1e-151	72	psu|LmjF25.0470	5.3	0	gb|TGME49_031610	8e-05	0	ECCG_00443T0	1.3	0	gi|16802277	2e-15	23	SAAG_00941T0	2e-21	25	TBCT_01704.1	2.3	0	CAWT_03977	0.94	0	HCAG_03480T0
	AF049	ATP:guanido phosphotransferase	Q95PM9	Plo i 1	355	A	no	25	11673567	Bm1_23610	1e-90	64	LOAG_10519T0	1e-129	60	WUBG_08434T0	1e-132	62	Smp_194770	2e-92	49	psu|PFI0975c	4.3	0	Tc00.1047053507241.30	1e-148	69	psu|LmjF30.0960	3.1	0	gb|TGME49_031610	0.001	0	ECCG_03489T0	0.2	0	gi|16802277	1e-14	29	SAAG_00941T0	1e-21	26	TBCT_01591.1	0.031	0	CAWT_03212	2.1	0	HCAG_09488T0
	AF050	Prolamin superfamily	O04004	Amb a 6	118	P	no	21	6863927	Bm1_12040	1.3	0	LOAG_00283T0	0.21	0	WUBG_06384T0	4.2	0	Smp_160460	9.1	0	psu|PF10_0288	1.1	0	Tc00.1047053509007.14	0.92	0	psu|LmjF34.1480	0.45	0	gb|TGME49_060210	0.66	0	ECCG_04311T0	1.5	0	gi|16802105	1.2	0	SAAG_02130T0	2.5	0	TBCT_01387.1	0.92	0	CAWT_01562	0.98	0	HCAG_04924T0
	AF050	Prolamin superfamily	Q8H2B8	Ana o 3	138	P	yes	80	15940148	Bm1_05690	0.001	0	LOAG_13825T0	0.003	0	WUBG_08659T0	0.001	0	Smp_031770.2	0.21	0	psu|MAL13P1.176	0.002	0	Tc00.1047053504047.30	0.011	0	psu|LmjF23.0640	0.007	0	gb|TGME49_112070	0.002	0	ECCG_02536T0	0.01	0	gi|16804422	0.031	0	SAAG_00260T0	0.002	0	TBCT_01213.1	4.7	0	CAWT_05863	0.002	0	HCAG_01167T0
	AF050	Prolamin superfamily	Q6PSU2	Ara h 2	172	P	yes	85	10474031	Bm1_05690	0.004	0	LOAG_10687T0	0.024	0	WUBG_11049T0	0.044	0	Smp_159380	6.9	0	psu|PFL1960w	0.044	0	Tc00.1047053509967.180	0.59	0	psu|LmjF13.1410	0.006	0	gb|TGME49_018490	0.006	0	ECCG_00135T0	0.16	0	gi|16803761	4.2	0	SAAG_00466T0	0.26	0	TBCT_00479.1	0.82	0	CAWT_03678	0.15	0	HCAG_11078T0
	AF050	Prolamin superfamily	B4XID4	Ara h 7	164	P	no	43	10474031	Bm1_05690	0.003	0	LOAG_13825T0	0.005	0	WUBG_06526T0	0.0004	0	Smp_179810	0.97	0	psu|PF13_0076	0.003	0	Tc00.1047053510649.24	0.0005	0	psu|LmjF19.0690	0.0004	0	gb|TGME49_086300	0.001	0	ECCG_04274T0	1.2	0	gi|16802134	1.7	0	SAAG_01195T0	0.7	0	TBCT_02508.1	3.7	0	CAWT_05660	0.012	0	HCAG_05215T0
	AF050	Prolamin superfamily	C4MGH0	Art v 3	116	P	yes	70	15347375	Bm1_52555	0.71	0	LOAG_08538T0	0.34	0	WUBG_13930T0	0.044	0	Smp_064010	0.37	0	psu|MAL7P1.171	0.6	0	Tc00.1047053506625.200	1.5	0	psu|LmjF34.2050	3.6	0	gb|TGME49_104650	0.074	0	ECCG_00995T0	1.8	0	gi|16803158	4.6	0	SAAG_00158T0	1.1	0	TBCT_00463.1	3.3	0	CAWT_04796	1.6	0	HCAG_06609T0
	AF050	Prolamin superfamily	P04403	Ber e 1	146	P	yes	88	9847444	Bm1_05690	0.013	0	LOAG_11304T0	0.089	0	WUBG_06656T0	0.36	0	Smp_159380	0.95	0	psu|PF10_0143	0.6	0	Tc00.1047053510741.180	0.54	0	psu|LmjF11.0710	0.11	0	gb|TGME49_086300	0.13	0	ECCG_00468T0	0.35	0	gi|16802871	1.4	0	SAAG_02320T0	0.2	0	TBCT_03746.1	1.8	0	CAWT_02741	0.01	0	HCAG_03251T0
	AF050	Prolamin superfamily	P80207	Bra j 1	129	P	yes	64	7688955	Bm1_00215	6e-06	0	LOAG_14175T0	0.001	0	WUBG_13406T0	0.001	0	Smp_125910	0.23	0	psu|PF10_0265	0.002	0	Tc00.1047053509607.20	0.062	0	psu|LmjF34.3230	0.19	0	gb|TGME49_028390	0.17	0	ECCG_04174T0	1.8	0	gi|16803860	1.5	0	SAAG_02576T0	3.9	0	TBCT_03088.1	5.4	0	CAWT_03794	0.0001	0	HCAG_11078T0
	AF050	Prolamin superfamily	P80208	Bra n 1	125	P	yes	80	16461144	Bm1_00585	0.005	0	LOAG_14175T0	0.002	0	WUBG_07950T0	0.002	0	Smp_105910	0.62	0	psu|PF10_0143	0.008	0	Tc00.1047053511409.10	0.22	0	psu|LmjF21.1565	0.18	0	gb|TGME49_105790	0.45	0	ECCG_02804T0	0.74	0	gi|16803860	3.1	0	SAAG_01995T0	4.7	0	TBCT_00851.1	3	0	CAWT_05137	0.02	0	HCAG_05961T0
	AF050	Prolamin superfamily	Q84XA9	Car i 1	143	P	NA			Bm1_19605	0.027	0	LOAG_13825T0	0.0001	0	WUBG_09956T0	0.014	0	Smp_169140	1.5	0	psu|PF10_0265	0.002	0	Tc00.1047053510575.30	0.048	0	psu|LmjF11.1170	0.008	0	gb|TGME49_011010	0.032	0	ECCG_03099T0	1.6	0	gi|16803313	3.1	0	SAAG_00556T0	2.7	0	TBCT_03385.1	1.7	0	CAWT_03678	0.004	0	HCAG_03773T0
	AF050	Prolamin superfamily	Q8W3Y9	Fag e 10	133	P	yes	57	15080835	Bm1_52470	1.3	0	LOAG_01433T0	0.28	0	WUBG_02827T0	0.3	0	Smp_122660	2.1	0	psu|PF13_0003	1.1	0	Tc00.1047053507485.70	0.2	0	psu|LmjF03.0340	0.46	0	gb|TGME49_013390	0.062	0	ECCG_00844T0	1.4	0	gi|16802199	0.93	0	SAAG_02000T0	0.28	0	TBCT_01524.1	5.8	0	CAWT_02759	2.9	0	HCAG_01603T0
	AF050	Prolamin superfamily	Q2PS07	Fag e 16	149	P	yes	73	11097313	Bm1_06430	0.96	0	LOAG_03530T0	1.3	0	WUBG_02827T0	0.29	0	Smp_122660	0.26	0	psu|PFI0755c	0.83	0	Tc00.1047053445777.10	0.57	0	psu|LmjF26.1710	0.2	0	gb|TGME49_014230	2	0	ECCG_04375T0	1.8	0	gi|16804066	0.87	0	SAAG_00031T0	0.77	0	TBCT_00978.1	4.1	0	CAWT_05531	0.32	0	HCAG_08043T0
	AF050	Prolamin superfamily	P32936	Hor v 15	149	P	yes	71	7750539	Bm1_55800	0.73	0	LOAG_00135T0	0.78	0	WUBG_02414T0	0.84	0	Smp_049510	19	0	psu|PF08_0142	9.1	0	Tc00.1047053506265.180	2.2	0	psu|LmjF10.0320	0.6	0	gb|TGME49_048570	0.39	0	ECCG_03899T0	15	0	gi|16803281	0.87	0	SAAG_01844T0	1.3	0	TBCT_02830.1	0.64	0	CAWT_00436	8	0	HCAG_08168T0
	AF050	Prolamin superfamily	P93198	Jug r 1	139	P	yes	75	9648708	Bm1_00515	0.012	0	LOAG_13825T0	0.0001	0	WUBG_10187T0	0.008	0	Smp_140820	5.4	0	psu|PF10_0265	0.003	0	Tc00.1047053510575.30	0.044	0	psu|LmjF11.1170	0.002	0	gb|TGME49_031200	0.018	0	ECCG_03993T0	0.92	0	gi|16803513	2.2	0	SAAG_00556T0	1.5	0	TBCT_01583.1	3.6	0	CAWT_01817	0.0006	0	HCAG_03773T0
	AF050	Prolamin superfamily	C5H617	Jug r 3	119	P	yes	91	15480333	Bm1_19540	8.3	0	LOAG_07852T0	0.81	0	WUBG_10823T0	5.7	0	Smp_142250	20	0	psu|PFF1540w	0.13	0	Tc00.1047053507765.140	0.11	0	psu|LmjF23.1670	0.27	0	gb|TGME49_059410	0.4	0	ECCG_02293T0	0.87	0	gi|16802114	0.74	0	SAAG_01767T0	4.3	0	TBCT_00926.1	0.25	0	CAWT_02625	0.12	0	HCAG_01390T0
	AF050	Prolamin superfamily	A1E2H5	Lac s 1	114	P	yes	71	12757453	Bm1_22575	0.1	0	LOAG_07877T0	0.086	0	WUBG_10443T0	0.22	0	Smp_142250	3.2	0	psu|PFF1060w	1	0	Tc00.1047053506001.30	0.058	0	psu|LmjF14.0200	0.062	0	gb|TGME49_083560	0.053	0	ECCG_02377T0	1.8	0	gi|16803266	2.6	0	SAAG_01976T0	0.61	0	TBCT_00463.1	0.29	0	CAWT_02625	0.52	0	HCAG_08068T0
	AF050	Prolamin superfamily	Q9M5X7	Mal d 3	115	P	yes	90	10069888	Bm1_50860	0.31	0	LOAG_05575T0	0.15	0	WUBG_06385T0	0.29	0	Smp_122390	1.1	0	psu|MAL7P1.175	4.9	0	Tc00.1047053509561.20	1.5	0	psu|LmjF31.2180	0.71	0	gb|TGME49_038160	0.79	0	ECCG_03601T0	3.1	0	gi|16804057	3.5	0	SAAG_02098T0	4	0	TBCT_03387.1	0.66	0	CAWT_01614	0.91	0	HCAG_02570T0
	AF050	Prolamin superfamily	Q40720	Ory s aA_TI	113	P	NA			Bm1_32725	0.65	0	LOAG_06082T0	0.93	0	WUBG_19008T0	0.48	0	Smp_024780	8.9	0	psu|MAL13P1.13	4.8	0	Tc00.1047053509601.40	1.1	0	psu|LmjF36.1550	1.1	0	gb|TGME49_025960	1.3	0	ECCG_03536T0	0.46	0	gi|16803891	1.1	0	SAAG_00464T0	1	0	TBCT_01808.1	0.13	0	CAWT_03462	0.86	0	HCAG_03404T0
	AF050	Prolamin superfamily	B7P072	Pis v 1	149	P	yes	68	19522997	Bm1_24945	0.003	0	LOAG_05896T0	6e-07	23	WUBG_08828T0	0.0006	0	Smp_159380	0.068	0	psu|PF10_0265	0.003	0	Tc00.1047053506835.10	0.018	0	psu|LmjF28.2210	0.041	0	gb|TGME49_059900	0.061	0	ECCG_02536T0	0.095	0	gi|16803170	0.51	0	SAAG_01832T0	0.45	0	TBCT_02112.1	4.1	0	CAWT_00858	0.013	0	HCAG_03773T0
	AF050	Prolamin superfamily	P81651	Pru ar 3	91	P	yes	100	10669861	Bm1_46530	5.2	0	LOAG_05575T0	0.24	0	WUBG_06384T0	3.1	0	Smp_122390	3.1	0	psu|PFE1640w	0.46	0	Tc00.1047053509203.14	1.1	0	psu|LmjF05.0710	1.8	0	gb|TGME49_013680	0.13	0	ECCG_00834T0	0.62	0	gi|16802564	4.1	0	SAAG_00626T0	0.95	0	TBCT_01737.1	3.1	0	CAWT_02722	2.1	0	HCAG_11130T0
	AF050	Prolamin superfamily	P82534	Pru d 3	91	P	yes	83	11419731	Bm1_22575	2.3	0	LOAG_10431T0	0.92	0	WUBG_12675T0	0.82	0	Smp_122390	3.1	0	psu|PFE1640w	5.1	0	Tc00.1047053507765.140	2.4	0	psu|LmjF10.1000	0.79	0	gb|TGME49_040250	1.1	0	ECCG_00834T0	0.21	0	gi|16802488	1.1	0	SAAG_00626T0	1.6	0	TBCT_03336.1	1.8	0	CAWT_02722	0.085	0	HCAG_11130T0
	AF050	Prolamin superfamily	Q9LED1	Pru p 3	91	P	no	96	19958316	Bm1_46530	2.3	0	LOAG_10431T0	1.6	0	WUBG_13338T0	1.4	0	Smp_122390	2.4	0	psu|PFC0005w	11	0	Tc00.1047053507765.140	0.37	0	psu|LmjF31.2990	0.35	0	gb|TGME49_040060	0.39	0	ECCG_00834T0	1.8	0	gi|16802830	3.2	0	SAAG_00626T0	0.25	0	TBCT_01614.1	0.63	0	CAWT_02722	0.065	0	HCAG_11130T0
	AF050	Prolamin superfamily	P01089	Ric c 1	258	P	yes	58	16754520	Bm1_47150	2e-05	0	LOAG_10695T0	0.0004	0	WUBG_00515T0	0.001	0	Smp_154440	0.054	0	psu|PF10_0143	0.001	0	Tc00.1047053511805.20	0.002	0	psu|LmjF29.0110	1e-05	0	gb|TGME49_059900	0.003	0	ECCG_03346T0	1.4	0	gi|16802830	0.14	0	SAAG_00556T0	0.21	0	TBCT_03798.1	2.5	0	CAWT_04944	2e-05	0	HCAG_02203T0
	AF050	Prolamin superfamily	Q9AUD1	Ses i 1	153	P	yes	100	11419730	Bm1_29765	0.002	0	LOAG_14175T0	0.015	0	WUBG_10878T0	0.035	0	Smp_159380	1.1	0	psu|PF11_0241	0.18	0	Tc00.1047053506775.130	0.094	0	psu|LmjF21.1220	0.011	0	gb|TGME49_081550	0.083	0	ECCG_02792T0	0.5	0	gi|16802870	0.91	0	SAAG_00495T0	0.81	0	TBCT_02141.1	0.88	0	CAWT_01817	0.031	0	HCAG_03773T0
	AF050	Prolamin superfamily	P15322	Sin a 1	145	P	yes	61	15945563	Bm1_42475	0.53	0	LOAG_07428T0	0.44	0	WUBG_07950T0	0.025	0	Smp_056930	1.6	0	psu|PFL0935c	0.27	0	Tc00.1047053506683.110	2.6	0	psu|LmjF35.4120	2.8	0	gb|TGME49_053580	0.82	0	ECCG_00017T0	0.44	0	gi|16803860	1.8	0	SAAG_00609T0	6.2	0	TBCT_03088.1	1.4	0	CAWT_00064	0.14	0	HCAG_05961T0
	AF050	Prolamin superfamily	P17314	Tri a 30	168	P	no	35	8334538	Bm1_53655	0.7	0	LOAG_09684T0	3.8	0	WUBG_10240T0	1	0	Smp_132850.2	8.5	0	psu|PFI0005w	26	0	Tc00.1047053508365.290	1.6	0	psu|LmjF36.2630	0.58	0	gb|TGME49_055960	0.009	0	ECCG_01434T0	3.7	0	gi|16803046	5.3	0	SAAG_00802T0	1.2	0	TBCT_02895.1	0.093	0	CAWT_01259	1.2	0	HCAG_07172T0
	AF050	Prolamin superfamily	Q6S5B1	Tri td aA_TI	168	P	NA			Bm1_53655	0.7	0	LOAG_09684T0	3.8	0	WUBG_10240T0	1	0	Smp_132850.2	8.5	0	psu|PFI0005w	26	0	Tc00.1047053508365.290	1.6	0	psu|LmjF36.2630	0.58	0	gb|TGME49_055960	0.009	0	ECCG_01434T0	3.7	0	gi|16803046	5.3	0	SAAG_00802T0	1.2	0	TBCT_02895.1	0.093	0	CAWT_01259	1.2	0	HCAG_07172T0
	AF050	Prolamin superfamily	P19656	Zea m 14	120	P	yes	86	11031346	Bm1_38155	1.3	0	LOAG_11977T0	0.49	0	WUBG_10037T0	0.4	0	Smp_002160	2.4	0	psu|PFL2005w	4.3	0	Tc00.1047053508061.50	0.023	0	psu|LmjF23.1670	0.003	0	gb|TGME49_056440	0.1	0	ECCG_01035T0	0.52	0	gi|16803640	1.3	0	SAAG_01091T0	5.7	0	TBCT_02938.1	0.25	0	CAWT_01779	0.12	0	HCAG_01209T0
	AF051	Profilin family	C3W2Q7	Ama r 2	133	P	NA		21086179	Bm1_21620	8e-08	29	LOAG_04692T0	3e-15	33	WUBG_17657T0	0.0005	0	Smp_179710	0.33	0	psu|PFI1565w	0.007	0	Tc00.1047053458759.10	5e-15	33	psu|LmjF32.0520	2e-15	34	gb|TGME49_093690	0.016	0	ECCG_02522T0	0.076	0	gi|16802244	0.017	0	SAAG_01626T0	0.63	0	TBCT_03421.1	0.18	0	CAWT_00619	6e-16	35	HCAG_07506T0
	AF051	Profilin family	Q64LH0	Amb a 8	133	P	no	26	18588553	Bm1_21620	4e-10	32	LOAG_04692T0	2e-16	37	WUBG_17657T0	0.0003	0	Smp_045940	0.96	0	psu|PFI1565w	2.5	0	Tc00.1047053458759.10	3e-14	35	psu|LmjF32.0520	4e-14	35	gb|TGME49_089710	0.11	0	ECCG_02522T0	0.02	0	gi|16802244	0.24	0	SAAG_01791T0	3.1	0	TBCT_00044.1	0.23	0	CAWT_00619	3e-14	33	HCAG_11466T0
	AF051	Profilin family	Q94JN2	Ana c 1	131	P	no	42	12065910	Bm1_21620	5e-08	28	LOAG_04692T0	9e-15	34	WUBG_17657T0	0.002	0	Smp_172590	22	0	psu|PFI1565w	0.043	0	Tc00.1047053458759.10	5e-12	33	psu|LmjF32.0520	7e-12	32	gb|TGME49_093690	0.002	0	ECCG_02522T0	0.044	0	gi|16804095	2	0	SAAG_00871T0	0.28	0	TBCT_02063.1	0.39	0	CAWT_00619	5e-13	31	HCAG_07506T0
	AF051	Profilin family	Q9XF37	Api g 4	134	P	no	23	10932086	Bm1_21620	6e-09	30	LOAG_04692T0	3e-15	37	WUBG_17657T0	0.0002	0	Smp_080920.3	8.1	0	psu|PFI1565w	1.1	0	Tc00.1047053510911.10	5e-11	32	psu|LmjF32.0520	2e-13	33	gb|TGME49_089710	0.081	0	ECCG_02522T0	0.1	0	gi|16802244	1.2	0	SAAG_00427T0	0.49	0	TBCT_02599.1	0.31	0	CAWT_00619	4e-15	33	HCAG_07506T0
	AF051	Profilin family	Q9SQI9	Ara h 5	131	P	no	13	10474031	Bm1_21620	8e-08	31	LOAG_04692T0	6e-15	36	WUBG_17657T0	0.001	0	Smp_170330	2.6	0	psu|PFI1565w	2.4	0	Tc00.1047053458759.10	2e-11	32	psu|LmjF32.0520	1e-12	34	gb|TGME49_093690	0.012	0	ECCG_02522T0	0.026	0	gi|16803221	0.31	0	SAAG_02370T0	1.8	0	TBCT_02476.1	0.39	0	CAWT_00619	3e-15	35	HCAG_07506T0
	AF051	Profilin family	Q8H2C8	Art v 4	133	P	no	50	17521730	Bm1_21620	4e-08	30	LOAG_04692T0	2e-16	37	WUBG_12362T0	0.0004	0	Smp_129110.2	24	0	psu|PFI1565w	0.059	0	Tc00.1047053458759.10	1e-12	32	psu|LmjF32.0520	2e-13	33	gb|TGME49_093690	0.14	0	ECCG_02522T0	0.02	0	gi|16802533	0.24	0	SAAG_01160T0	0.48	0	TBCT_03583.1	0.68	0	CAWT_00619	1e-11	30	HCAG_07506T0
	AF051	Profilin family	P25816	Bet v 2	133	P	no	15	19800675	Bm1_21620	9e-07	30	LOAG_04692T0	2e-16	38	WUBG_17657T0	0.0001	0	Smp_135560	1.6	0	psu|PFC0270w	0.65	0	Tc00.1047053510911.10	9e-10	30	psu|LmjF32.0520	7e-13	33	gb|TGME49_093690	0.9	0	ECCG_02522T0	0.004	0	gi|16804194	0.42	0	SAAG_00346T0	0.16	0	TBCT_00044.1	0.08	0	CAWT_00619	1e-14	34	HCAG_09936T0
	AF051	Profilin family	Q93YI9	Cap a 2	131	P	no	32	12915767	Bm1_46515	0.066	0	LOAG_04692T0	3e-14	35	WUBG_17657T0	0.003	0	Smp_123830	22	0	psu|PFI1565w	0.074	0	Tc00.1047053510911.10	3e-12	33	psu|LmjF32.0520	4e-13	34	gb|TGME49_093690	0.012	0	ECCG_02522T0	0.009	0	gi|16802533	0.69	0	SAAG_00346T0	2.3	0	TBCT_03625.1	1.1	0	CAWT_00619	6e-14	33	HCAG_07506T0
	AF051	Profilin family	C5J3U0	Che a 2	133	P	yes	55	15208604	Bm1_21620	1e-07	30	LOAG_04692T0	6e-15	37	WUBG_17657T0	0.0003	0	Smp_141310	2.1	0	psu|MAL13P1.356	1.1	0	Tc00.1047053510911.10	1e-11	32	psu|LmjF32.0520	2e-12	33	gb|TGME49_093690	0.021	0	ECCG_02522T0	0.099	0	gi|16802244	0.11	0	SAAG_01267T0	0.63	0	TBCT_01188.1	0.062	0	CAWT_00619	1e-14	31	HCAG_07506T0
	AF051	Profilin family	P84177	Cit s 2	131	P	yes	87	16197476	Bm1_26345	0.023	0	LOAG_04692T0	4e-15	36	WUBG_17657T0	0.0006	0	Smp_000300	85	0	psu|PFI1565w	0.043	0	Tc00.1047053510911.10	4e-12	32	psu|LmjF32.0520	2e-12	32	gb|TGME49_093690	0.002	0	ECCG_02522T0	0.009	0	gi|16802533	0.4	0	SAAG_01854T0	1.1	0	TBCT_01889.1	1.1	0	CAWT_00619	4e-15	34	HCAG_07506T0
	AF051	Profilin family	Q9AXH4	Cor a 2	131	P	no	42	19344939	Bm1_21620	2e-07	30	LOAG_04692T0	6e-14	34	WUBG_17657T0	0.002	0	Smp_146300	0.53	0	psu|PFI1565w	0.21	0	Tc00.1047053510911.10	8e-11	31	psu|LmjF32.0520	2e-12	32	gb|TGME49_093690	0.035	0	ECCG_02522T0	0.033	0	gi|16804856	0.11	0	SAAG_01626T0	1.4	0	TBCT_02063.1	1.1	0	CAWT_00619	3e-15	34	HCAG_07506T0
	AF051	Profilin family	Q5EF31	Cro s 2	131	P	NA			Bm1_21620	8e-08	27	LOAG_04692T0	3e-13	35	WUBG_17657T0	0.0008	0	Smp_123830	17	0	psu|PFI1565w	5.3	0	Tc00.1047053458759.10	2e-10	32	psu|LmjF32.0520	2e-11	32	gb|TGME49_093690	0.001	0	ECCG_02522T0	0.033	0	gi|16804054	0.69	0	SAAG_00815T0	0.81	0	TBCT_01256.1	0.078	0	CAWT_00619	2e-14	32	HCAG_03449T0
	AF051	Profilin family	Q84MM5	Cuc m 2	131	P	yes	71	12642849	Bm1_21620	1e-06	0	LOAG_04692T0	9e-15	35	WUBG_12362T0	0.009	0	Smp_170340	0.24	0	psu|PFI1565w	0.28	0	Tc00.1047053458759.10	2e-12	33	psu|LmjF32.0520	2e-12	35	gb|TGME49_089710	0.02	0	ECCG_02522T0	0.057	0	gi|16802244	1.5	0	SAAG_02407T0	6.8	0	TBCT_03819.1	0.66	0	CAWT_00619	8e-13	32	HCAG_05014T0
	AF051	Profilin family	O04725	Cyn d 12	131	P	NA			Bm1_26345	0.006	0	LOAG_04692T0	4e-14	35	WUBG_17657T0	0.007	0	Smp_123830	0.7	0	psu|PFI1565w	0.48	0	Tc00.1047053510911.10	5e-12	30	psu|LmjF32.0520	1e-13	32	gb|TGME49_089710	0.078	0	ECCG_02522T0	0.012	0	gi|16803051	0.69	0	SAAG_01626T0	0.81	0	TBCT_01024.1	0.86	0	CAWT_00619	1e-13	34	HCAG_07506T0
	AF051	Profilin family	Q8SAE6	Dau c 4	134	P	no	38	16008686	Bm1_21620	7e-07	28	LOAG_04692T0	1e-14	37	WUBG_17657T0	0.0001	0	Smp_045940	11	0	psu|PFI1565w	0.39	0	Tc00.1047053510911.10	3e-10	30	psu|LmjF32.0520	3e-13	32	gb|TGME49_093690	0.14	0	ECCG_02522T0	0.17	0	gi|16804792	2.7	0	SAAG_00075T0	0.64	0	TBCT_01521.1	0.41	0	CAWT_00619	9e-15	34	HCAG_07506T0
	AF051	Profilin family	P0C0Y3	Fra a 4	131	P	no			Bm1_21620	3e-07	31	LOAG_04692T0	2e-13	34	WUBG_17657T0	0.005	0	Smp_135560	3.5	0	psu|PFI1565w	0.025	0	Tc00.1047053510911.10	7e-12	31	psu|LmjF32.0520	1e-12	33	gb|TGME49_093690	0.078	0	ECCG_02522T0	0.057	0	gi|16804856	0.01	0	SAAG_00960T0	0.21	0	TBCT_01889.1	0.3	0	CAWT_00619	7e-15	33	HCAG_07506T0
	AF051	Profilin family	O65810	Gly m 3	131	P	yes	69	10589015	Bm1_21620	2e-08	30	LOAG_04692T0	2e-14	34	WUBG_17657T0	0.001	0	Smp_123830	4.5	0	psu|PFI1565w	0.019	0	Tc00.1047053510911.10	9e-12	32	psu|LmjF32.0520	1e-12	34	gb|TGME49_093690	0.004	0	ECCG_02522T0	0.044	0	gi|16804599	0.9	0	SAAG_01030T0	3.1	0	TBCT_01256.1	0.39	0	CAWT_00619	3e-14	34	HCAG_05221T0
	AF051	Profilin family	O81982	Hel a 2	133	P	no	30	9798651	Bm1_21620	4e-08	30	LOAG_04692T0	2e-16	38	WUBG_17657T0	0.0002	0	Smp_139060	69	0	psu|PFI1565w	0.65	0	Tc00.1047053458759.10	3e-14	35	psu|LmjF32.0520	4e-15	37	gb|TGME49_089710	0.047	0	ECCG_02522T0	0.015	0	gi|16802244	0.049	0	SAAG_01267T0	1.1	0	TBCT_03550.1	0.4	0	CAWT_00619	3e-14	33	HCAG_03555T0
	AF051	Profilin family	Q9LEI8	Hev b 8	131	P	no	42	12169172	Bm1_21620	5e-08	29	LOAG_04692T0	1e-16	37	WUBG_17657T0	3e-05	0	Smp_179710	0.7	0	psu|PFI1565w	0.16	0	Tc00.1047053510911.10	3e-11	31	psu|LmjF32.0520	1e-12	33	gb|TGME49_093690	0.027	0	ECCG_02522T0	0.015	0	gi|16804194	0.69	0	SAAG_00427T0	1.8	0	TBCT_00044.1	0.016	0	CAWT_00619	8e-16	32	HCAG_07506T0
	AF051	Profilin family	Q2PQ57	Lit c 1	131	P	NA			Bm1_21620	4e-09	31	LOAG_04692T0	3e-15	36	WUBG_17657T0	0.0005	0	Smp_170340	10	0	psu|PFI1565w	0.82	0	Tc00.1047053458759.10	2e-12	33	psu|LmjF32.0520	5e-13	33	gb|TGME49_093690	0.078	0	ECCG_02522T0	0.026	0	gi|16804730	4.5	0	SAAG_00427T0	1.1	0	TBCT_00044.1	0.078	0	CAWT_00619	2e-16	35	HCAG_07506T0
	AF051	Profilin family	Q3BCS8	Mal d 4	131	P	NA			Bm1_21620	7e-07	29	LOAG_04692T0	1e-15	36	WUBG_17657T0	2e-05	0	Smp_045940	7.7	0	psu|PFI1565w	1.1	0	Tc00.1047053510911.10	5e-12	31	psu|LmjF32.0520	1e-12	32	gb|TGME49_093690	0.66	0	ECCG_02522T0	0.02	0	gi|16804194	1.2	0	SAAG_00815T0	0.62	0	TBCT_01889.1	0.3	0	CAWT_00619	5e-16	36	HCAG_07506T0
	AF051	Profilin family	Q2XPH2	Man i 3	131	P	no	44	17417721	Bm1_21620	2e-07	31	LOAG_04692T0	3e-15	37	WUBG_17657T0	0.0004	0	Smp_003710	2.6	0	psu|PFI1565w	3.1	0	Tc00.1047053458759.10	7e-12	32	psu|LmjF32.0520	1e-13	32	gb|TGME49_093690	0.012	0	ECCG_02522T0	0.075	0	gi|16803082	3.4	0	SAAG_00960T0	0.095	0	TBCT_01858.1	0.046	0	CAWT_00619	2e-15	35	HCAG_07506T0
	AF051	Profilin family	O49894	Mer a 1	133	P	yes	59	9104791	Bm1_26345	0.12	0	LOAG_04692T0	2e-16	39	WUBG_17657T0	3e-05	0	Smp_045940	31	0	psu|PFI1565w	1.4	0	Tc00.1047053510911.10	3e-12	33	psu|LmjF32.0520	9e-15	36	gb|TGME49_093690	0.24	0	ECCG_02522T0	0.026	0	gi|16804856	0.32	0	SAAG_00427T0	0.28	0	TBCT_00044.1	0.08	0	CAWT_00619	6e-16	35	HCAG_07506T0
	AF051	Profilin family	Q94JN3	Mus a 1	131	P	no	44	12065910	Bm1_21620	1e-09	32	LOAG_04692T0	6e-15	37	WUBG_17657T0	0.001	0	Smp_170340	7.7	0	psu|PFI1565w	1.8	0	Tc00.1047053510911.10	2e-11	34	psu|LmjF32.0520	2e-13	33	gb|TGME49_093690	0.004	0	ECCG_02522T0	0.13	0	gi|16803082	2	0	SAAG_01626T0	1.8	0	TBCT_03139.1	1.1	0	CAWT_00619	9e-15	33	HCAG_07506T0
	AF051	Profilin family	A4GFC4	Ole e 2	131	P	yes	70	18849614	Bm1_21620	2e-08	30	LOAG_04692T0	4e-15	36	WUBG_17657T0	0.0001	0	Smp_179710	2	0	psu|PFI1565w	0.62	0	Tc00.1047053510911.10	3e-13	34	psu|LmjF32.0520	8e-14	36	gb|TGME49_093690	0.06	0	ECCG_02522T0	0.015	0	gi|16802244	0.4	0	SAAG_01626T0	1.1	0	TBCT_00044.1	0.027	0	CAWT_00619	1e-15	34	HCAG_07506T0
	AF051	Profilin family	Q9T0M8	Par j 3	131	P	yes	100	11958736	Bm1_21620	2e-08	29	LOAG_04692T0	3e-18	40	WUBG_17657T0	2e-05	0	Smp_063090	0.31	0	psu|PFI1565w	0.009	0	Tc00.1047053458759.10	2e-13	32	psu|LmjF32.0520	8e-17	35	gb|TGME49_093690	0.0008	0	ECCG_02522T0	0.057	0	gi|16804752	0.11	0	SAAG_00679T0	0.62	0	TBCT_00044.1	0.035	0	CAWT_00619	2e-15	33	HCAG_05266T0
	AF051	Profilin family	O24282	Phl p 12	131	P	no	15	12534548	Bm1_26345	0.03	0	LOAG_04692T0	7e-15	35	WUBG_17657T0	0.003	0	Smp_135560	13	0	psu|PF11_0517	9	0	Tc00.1047053458759.10	2e-11	31	psu|LmjF32.0520	5e-13	34	gb|TGME49_093690	0.3	0	ECCG_02522T0	0.026	0	gi|16804575	0.69	0	SAAG_02332T0	3.1	0	TBCT_03550.1	0.86	0	CAWT_00619	1e-13	32	HCAG_00707T0
	AF051	Profilin family	Q8L5D8	Pho d 2	131	P	yes	64	15784118	Bm1_21620	3e-07	28	LOAG_04692T0	6e-15	35	WUBG_12362T0	0.003	0	Smp_162000	4.5	0	psu|PFD1220c	3.1	0	Tc00.1047053510911.10	2e-10	30	psu|LmjF32.0520	6e-12	33	gb|TGME49_093690	0.13	0	ECCG_02522T0	0.044	0	gi|16803082	1.2	0	SAAG_02187T0	3.1	0	TBCT_00153.1	0.66	0	CAWT_00619	4e-14	33	HCAG_07506T0
	AF051	Profilin family	Q9XF39	Pru av 4	131	P	no	16	11295665	Bm1_26345	0.039	0	LOAG_04692T0	6e-15	36	WUBG_17657T0	0.005	0	Smp_172590	10	0	psu|PFI1565w	0.21	0	Tc00.1047053510911.10	1e-13	34	psu|LmjF32.0520	5e-14	34	gb|TGME49_093690	0.005	0	ECCG_02522T0	0.007	0	gi|16802533	0.18	0	SAAG_01626T0	0.073	0	TBCT_03409.1	4.3	0	CAWT_00619	2e-14	33	HCAG_07506T0
	AF051	Profilin family	Q8GSL5	Pru du 4	131	P	no	44	17030246	Bm1_26345	0.039	0	LOAG_04692T0	3e-15	36	WUBG_17657T0	0.001	0	Smp_172590	10	0	psu|PFI1565w	0.28	0	Tc00.1047053510911.10	1e-12	32	psu|LmjF32.0520	5e-13	32	gb|TGME49_093690	0.005	0	ECCG_02522T0	0.002	0	gi|16802533	0.31	0	SAAG_01626T0	0.056	0	TBCT_00751.1	3.3	0	CAWT_00619	1e-14	33	HCAG_07506T0
	AF051	Profilin family	Q8GT39	Pru p 4	131	P	yes	52	12823124	Bm1_21620	7e-07	29	LOAG_04692T0	7e-13	33	WUBG_12362T0	0.015	0	Smp_135560	2.6	0	psu|PFI1565w	0.043	0	Tc00.1047053510911.10	1e-12	33	psu|LmjF32.0520	2e-12	33	gb|TGME49_093690	0.078	0	ECCG_02522T0	0.026	0	gi|16804856	0.028	0	SAAG_02187T0	1.4	0	TBCT_01889.1	0.39	0	CAWT_00619	4e-14	32	HCAG_03449T0
	AF051	Profilin family	Q9XF38	Pyr c 4	131	P	NA			Bm1_21620	8e-08	29	LOAG_04692T0	1e-15	36	WUBG_17657T0	0.0001	0	Smp_045940	7.7	0	psu|PFI1565w	6.9	0	Tc00.1047053510911.10	2e-12	31	psu|LmjF32.0520	1e-13	33	gb|TGME49_093690	0.39	0	ECCG_02522T0	0.026	0	gi|16802533	0.9	0	SAAG_00427T0	0.12	0	TBCT_01889.1	0.3	0	CAWT_00619	2e-16	36	HCAG_07506T0
	AF051	Profilin family	P49234	Tri a 12	140	P	NA			Bm1_21620	1e-08	31	LOAG_04692T0	1e-15	36	WUBG_12362T0	0.0003	0	Smp_123830	5.5	0	psu|PFI1565w	0.017	0	Tc00.1047053458759.10	5e-11	33	psu|LmjF32.0520	6e-13	36	gb|TGME49_093690	0.008	0	ECCG_02522T0	0.017	0	gi|16802244	0.6	0	SAAG_00346T0	0.7	0	TBCT_00837.1	0.088	0	CAWT_00619	2e-12	31	HCAG_00707T0
	AF052	Glycoside hydrolase family 32	Q8RVW4	Lyc e 2	636	P	yes	82	12704374	Bm1_21990	2	0	LOAG_12017T0	3.5	0	WUBG_13685T0	2.7	0	Smp_159270	13	0	psu|PFL1270w	0.27	0	Tc00.1047053507159.20	0.98	0	psu|LmjF35.0640	4e-41	30	gb|TGME49_050800	1.9	0	ECCG_00883T0	5e-39	27	gi|16803966	5.9	0	SAAG_02540T0	2e-24	29	TBCT_00293.1	0.4	0	CAWT_05726	4.2	0	HCAG_10292T0
	AF053	Flavodoxin	P42058	Alt a 7	204	F	no	7	7898496	Bm1_44250	0.98	0	LOAG_00202T0	0.12	0	WUBG_07686T0	1.4	0	Smp_002840	17	0	psu|PF07_0073	3.3	0	Tc00.1047053476733.20	6.8	0	psu|LmjF36.3680	3.1	0	gb|TGME49_014490	0.93	0	ECCG_01424T0	8e-43	46	gi|16802901	0.29	0	SAAG_01600T0	2.2	0	TBCT_02965.1	0.011	0	CAWT_01865	5e-64	57	HCAG_04745T0
	AF053	Flavodoxin	P42059	Cla h 7	204	F	no	22	7898496	Bm1_01060	0.98	0	LOAG_01392T0	3	0	WUBG_07832T0	2.5	0	Smp_149300	3.4	0	psu|PFB0010w	7.3	0	Tc00.1047053506297.320	0.61	0	psu|LmjF08.0520	0.28	0	gb|TGME49_109880	0.42	0	ECCG_01424T0	6e-41	45	gi|16804526	1.1	0	SAAG_00195T0	1.6	0	TBCT_02392.1	1.1	0	CAWT_01865	1e-57	54	HCAG_04745T0
	AF054	Tropomyosin family	B0KZJ4	Aca s 10	284	A	NA		18850281	Bm1_02060	4e-57	48	LOAG_08281T0	8e-59	73	WUBG_08909T0	1e-33	74	Smp_031770.4	1e-89	60	psu|PFL0315c	2e-15	23	Tc00.1047053509631.140	1e-14	26	psu|LmjF34.0690	2e-20	24	gb|TGME49_094650	8e-16	20	ECCG_01131T0	7e-09	24	gi|16803844	5e-11	20	SAAG_01832T0	2e-09	18	TBCT_01259.1	2e-06	0	CAWT_03286	2e-14	22	HCAG_07829T0
	AF054	Tropomyosin family	A1KYZ1	Ale o 10	284	A	NA			Bm1_02060	2e-58	48	LOAG_08281T0	2e-59	74	WUBG_08909T0	4e-34	75	Smp_031770.4	5e-90	60	psu|PFE0230w	1e-14	26	Tc00.1047053510247.10	1e-15	23	psu|LmjF34.0690	3e-21	24	gb|TGME49_017360	9e-17	24	ECCG_01131T0	2e-09	24	gi|16803844	5e-11	20	SAAG_01832T0	2e-08	18	TBCT_01259.1	2e-06	0	CAWT_03286	3e-14	21	HCAG_10759T0
	AF054	Tropomyosin family	Q9NAS5	Ani s 3	284	A	no	0	11003461	Bm1_02060	4e-65	56	LOAG_08281T0	4e-71	90	WUBG_08909T0	1e-39	88	Smp_031770.4	6e-87	57	psu|PFE0230w	1e-17	28	Tc00.1047053509631.140	3e-16	25	psu|LmjF34.0690	4e-24	30	gb|TGME49_094650	3e-16	20	ECCG_01795T0	8e-08	25	gi|16803264	3e-09	18	SAAG_01832T0	5e-10	20	TBCT_02860.1	1e-07	23	CAWT_03286	2e-16	25	HCAG_07829T0
	AF054	Tropomyosin family	A2V716	Bal r 1	284	A	NA			Bm1_02060	1e-39	38	LOAG_08281T0	3e-45	59	WUBG_08909T0	1e-25	58	Smp_044010	1e-91	62	psu|MAL13P1.96	9e-14	21	Tc00.1047053509631.140	1e-15	27	psu|LmjF34.0690	3e-19	26	gb|TGME49_048570	1e-14	23	ECCG_01131T0	2e-05	0	gi|16803844	4e-07	19	SAAG_01832T0	4e-11	19	TBCT_02860.1	0.0004	0	CAWT_03286	6e-14	21	HCAG_09536T0
	AF054	Tropomyosin family	A7XZI8	Blo t 10	295	A	no	9	21332797	Bm1_02060	1e-58	48	LOAG_08281T0	2e-59	74	WUBG_08909T0	4e-34	75	Smp_031770.4	4e-90	60	psu|PFE0230w	1e-14	27	Tc00.1047053509631.140	5e-16	27	psu|LmjF34.0690	2e-22	28	gb|TGME49_017360	9e-17	24	ECCG_01131T0	1e-08	24	gi|16803844	1e-11	21	SAAG_01832T0	2e-09	18	TBCT_01259.1	6e-07	24	CAWT_03286	6e-14	23	HCAG_10759T0
	AF054	Tropomyosin family	A7XZL2	Blo t 14	201	A	no	12	17584167	Bm1_02060	2e-36	42	LOAG_08282T0	3e-34	56	WUBG_07835T0	8e-22	62	Smp_031770.1	1e-49	52	psu|PF11_0486	1e-08	20	Tc00.1047053507895.124	5e-09	28	psu|LmjF34.0690	4e-12	27	gb|TGME49_112070	5e-10	30	ECCG_00838T0	7e-07	27	gi|16803439	1e-06	0	SAAG_01884T0	1e-06	0	TBCT_02860.1	7e-05	0	CAWT_02133	4e-11	21	HCAG_06375T0
	AF054	Tropomyosin family	B5TTU5	Bom m 7	285	A	NA			Bm1_02060	1e-56	50	LOAG_08281T0	3e-58	73	WUBG_08909T0	2e-31	70	Smp_031770.4	2e-84	56	psu|PFE0230w	5e-15	26	Tc00.1047053510247.10	4e-14	22	psu|LmjF34.0690	2e-21	30	gb|TGME49_012880	6e-15	23	ECCG_01131T0	8e-11	24	gi|16803264	4e-10	22	SAAG_01832T0	6e-11	22	TBCT_02860.1	1e-05	0	CAWT_03120	2e-14	28	HCAG_10759T0
	AF054	Tropomyosin family	Q9N2R3	Cha f 1	264	A	yes	100	9819304	Bm1_02060	6e-55	49	LOAG_08281T0	1e-55	81	WUBG_08909T0	2e-28	82	Smp_031770.4	6e-81	59	psu|PFE0230w	5e-14	27	Tc00.1047053509631.140	3e-14	27	psu|LmjF34.0690	2e-20	29	gb|TGME49_012880	2e-14	27	ECCG_01131T0	2e-10	26	gi|16803264	2e-10	21	SAAG_01832T0	6e-10	19	TBCT_02860.1	0.0001	0	CAWT_03286	1e-14	20	HCAG_10759T0
	AF054	Tropomyosin family	O96764	Chi k 10	285	A	yes	81	15013982	Bm1_02060	1e-53	49	LOAG_08281T0	2e-58	75	WUBG_08909T0	1e-31	72	Smp_031770.4	3e-81	55	psu|PF11_0277	6e-12	19	Tc00.1047053506559.559	3e-13	26	psu|LmjF34.0690	8e-19	27	gb|TGME49_012880	1e-13	24	ECCG_01131T0	4e-08	23	gi|16803264	3e-08	24	SAAG_01832T0	2e-09	20	TBCT_02860.1	1e-06	0	CAWT_03120	5e-12	26	HCAG_10759T0
	AF054	Tropomyosin family	Q95WY0	Cra g 1	233	A	NA			Bm1_02060	4e-41	43	LOAG_08281T0	9e-50	63	WUBG_08909T0	3e-30	63	Smp_044010	2e-80	69	psu|PFI0175w-a	1e-11	21	Tc00.1047053509631.140	2e-14	29	psu|LmjF34.0690	2e-16	30	gb|TGME49_012880	3e-12	25	ECCG_01131T0	1e-06	0	gi|16804542	2e-08	22	SAAG_01832T0	1e-07	19	TBCT_02860.1	0.0001	0	CAWT_03286	8e-16	23	HCAG_10759T0
	AF054	Tropomyosin family	Q2WBI0	Der g 10	284	A	NA			Bm1_02060	4e-56	49	LOAG_08281T0	1e-57	72	WUBG_08909T0	2e-33	74	Smp_031770.4	8e-87	59	psu|PFA0675w	4e-13	23	Tc00.1047053510247.10	5e-16	23	psu|LmjF34.0690	8e-20	27	gb|TGME49_048570	2e-14	19	ECCG_01131T0	2e-06	0	gi|16803439	2e-09	25	SAAG_01832T0	4e-08	20	TBCT_02860.1	4e-06	0	CAWT_03286	6e-14	20	HCAG_03489T0
	AF054	Tropomyosin family	O18416	Der p 10	284	A	no	10	19021722	Bm1_02060	2e-56	47	LOAG_08281T0	2e-57	72	WUBG_08909T0	3e-32	72	Smp_031770.4	4e-88	59	psu|PFL0315c	8e-15	22	Tc00.1047053509631.140	4e-15	26	psu|LmjF34.0690	2e-20	24	gb|TGME49_017360	1e-15	23	ECCG_04021T0	3e-07	22	gi|16803844	1e-11	21	SAAG_01832T0	8e-08	17	TBCT_01259.1	2e-06	0	CAWT_03286	1e-13	21	HCAG_07829T0
	AF054	Tropomyosin family	Q9GZ71	Hal d 1	284	A	NA			Bm1_02060	4e-45	41	LOAG_08281T0	3e-50	63	WUBG_08909T0	6e-30	63	Smp_044010	1e-101	68	psu|PFI0175w-a	2e-14	22	Tc00.1047053509631.140	3e-18	29	psu|LmjF34.0690	2e-19	28	gb|TGME49_048570	8e-16	21	ECCG_01971T0	1e-06	0	gi|16803844	5e-11	28	SAAG_01832T0	3e-11	19	TBCT_02681.1	1e-05	0	CAWT_03286	5e-15	21	HCAG_05774T0
	AF054	Tropomyosin family	O97192	Hel as 1	284	A	no	18	12065908	Bm1_02060	6e-45	41	LOAG_08281T0	1e-49	63	WUBG_08909T0	2e-29	63	Smp_031770.4	5e-97	63	psu|PF11_0486	9e-13	25	Tc00.1047053511127.20	7e-15	22	psu|LmjF16.1460	2e-16	26	gb|TGME49_048570	7e-17	22	ECCG_01971T0	0.0001	0	gi|16803844	7e-12	19	SAAG_01832T0	1e-12	21	TBCT_02860.1	8e-06	0	CAWT_03286	4e-15	19	HCAG_06375T0
	AF054	Tropomyosin family	O44119	Hom a 1	284	A	NA			Bm1_02060	4e-55	49	LOAG_08281T0	6e-60	75	WUBG_08909T0	2e-33	74	Smp_031770.4	2e-89	59	psu|PF11_0207	2e-15	21	Tc00.1047053509631.140	2e-16	27	psu|LmjF34.0690	2e-21	28	gb|TGME49_012880	1e-15	27	ECCG_01131T0	3e-09	26	gi|16803844	2e-10	19	SAAG_01832T0	1e-10	20	TBCT_01635.1	4e-05	0	CAWT_03286	1e-15	20	HCAG_03489T0
	AF054	Tropomyosin family	B6DUC3	Jas la 1	232	A	NA			Bm1_02060	3e-56	51	LOAG_08281T0	4e-50	81	WUBG_08909T0	4e-23	82	Smp_031770.1	3e-68	57	psu|PFE0230w	2e-11	28	Tc00.1047053506201.170	7e-13	27	psu|LmjF34.0690	4e-16	27	gb|TGME49_012880	2e-13	27	ECCG_01131T0	3e-07	25	gi|16803844	9e-08	18	SAAG_01832T0	7e-11	21	TBCT_01259.1	9e-05	0	CAWT_03286	1e-12	22	HCAG_06695T0
	AF054	Tropomyosin family	Q9NFZ4	Lep d 10	284	A	no	13	12740526	Bm1_02060	4e-55	47	LOAG_08281T0	4e-59	74	WUBG_08909T0	1e-33	74	Smp_031770.4	1e-88	59	psu|PFE0230w	7e-14	27	Tc00.1047053510247.10	7e-15	23	psu|LmjF34.0690	3e-20	26	gb|TGME49_094650	2e-15	20	ECCG_04021T0	1e-07	23	gi|16803844	2e-12	22	SAAG_01832T0	3e-08	18	TBCT_02860.1	5e-05	0	CAWT_03286	6e-14	21	HCAG_07829T0
	AF054	Tropomyosin family	B4YAH6	Lit v 1	284	A	yes	81	20471069	Bm1_02060	9e-55	50	LOAG_08281T0	6e-60	75	WUBG_08909T0	2e-33	74	Smp_044010	1e-88	60	psu|PFE0230w	7e-14	26	Tc00.1047053509631.140	3e-15	26	psu|LmjF34.0690	4e-21	27	gb|TGME49_048570	2e-15	23	ECCG_01131T0	7e-09	23	gi|16803844	2e-10	19	SAAG_01832T0	1e-12	20	TBCT_02860.1	0.0001	0	CAWT_03286	2e-15	23	HCAG_10759T0
	AF054	Tropomyosin family	Q25456	Met e 1	274	A	NA		8939159	Bm1_02060	4e-55	50	LOAG_08281T0	5e-60	75	WUBG_08909T0	2e-33	74	Smp_044010	1e-85	59	psu|PFB0145c	5e-13	23	Tc00.1047053509631.140	8e-16	26	psu|LmjF34.0690	4e-20	29	gb|TGME49_048570	2e-15	24	ECCG_01131T0	3e-08	25	gi|16803844	1e-10	18	SAAG_01832T0	2e-12	20	TBCT_02860.1	0.0002	0	CAWT_03286	2e-15	20	HCAG_10759T0
	AF054	Tropomyosin family	O61379	Pan s 1	274	A	NA		9597774	Bm1_02060	1e-55	50	LOAG_08281T0	2e-59	75	WUBG_08909T0	6e-33	73	Smp_031770.4	4e-86	58	psu|PFF1285w	5e-14	20	Tc00.1047053509631.140	1e-15	27	psu|LmjF34.0690	1e-20	28	gb|TGME49_048570	6e-16	24	ECCG_04021T0	2e-08	22	gi|16804542	5e-10	20	SAAG_01832T0	5e-12	20	TBCT_02860.1	1e-05	0	CAWT_03286	1e-14	22	HCAG_10759T0
	AF054	Tropomyosin family	B5AF35	Pat y 1	284	A	yes	100	16159186	Bm1_02060	3e-38	38	LOAG_08281T0	2e-42	57	WUBG_08909T0	4e-26	62	Smp_044010	4e-84	58	psu|PF10_0356	2e-12	24	Tc00.1047053510247.10	7e-15	24	psu|LmjF34.0690	1e-16	25	gb|TGME49_048570	2e-14	21	ECCG_04021T0	2e-06	0	gi|16803844	1e-07	22	SAAG_01832T0	3e-11	19	TBCT_02860.1	0.001	0	CAWT_03286	3e-14	20	HCAG_10759T0
	AF054	Tropomyosin family	Q3Y8M6	Pen a 1	284	A	no	39	21354024	Bm1_02060	9e-55	50	LOAG_08281T0	6e-60	75	WUBG_08909T0	2e-33	74	Smp_044010	1e-88	60	psu|PFE0230w	7e-14	26	Tc00.1047053509631.140	3e-15	26	psu|LmjF34.0690	4e-21	27	gb|TGME49_048570	2e-15	23	ECCG_01131T0	7e-09	23	gi|16803844	2e-10	19	SAAG_01832T0	1e-12	20	TBCT_02860.1	0.0001	0	CAWT_03286	2e-15	23	HCAG_10759T0
	AF054	Tropomyosin family	Q9UB83	Per a 7	284	A	no	50	10452753	Bm1_02060	1e-54	48	LOAG_08281T0	4e-56	71	WUBG_08909T0	3e-31	70	Smp_031770.4	1e-83	56	psu|PFE0230w	4e-13	25	Tc00.1047053510247.10	1e-13	24	psu|LmjF34.0690	2e-18	30	gb|TGME49_048570	1e-13	23	ECCG_01131T0	1e-07	25	gi|16803844	6e-09	23	SAAG_01832T0	2e-10	19	TBCT_02667.1	0.0001	0	CAWT_03286	4e-14	21	HCAG_10759T0
	AF054	Tropomyosin family	Q9GZ70	Per v 1	284	A	NA			Bm1_02060	3e-36	35	LOAG_08281T0	6e-44	57	WUBG_08909T0	1e-25	55	Smp_044010	5e-85	58	psu|PFB0145c	7e-14	21	Tc00.1047053509023.10	1e-15	25	psu|LmjF34.0690	5e-16	24	gb|TGME49_048570	3e-14	23	ECCG_01131T0	4e-06	0	gi|16803685	1e-08	24	SAAG_01832T0	2e-11	20	TBCT_02860.1	0.003	0	CAWT_03286	6e-18	23	HCAG_05774T0
	AF054	Tropomyosin family	A1YYV6	Por s 1	284	A	NA			Bm1_02060	1e-55	49	LOAG_08281T0	4e-60	75	WUBG_08909T0	2e-33	74	Smp_031770.4	6e-90	59	psu|PFE0230w	5e-15	27	Tc00.1047053509631.140	2e-17	27	psu|LmjF34.0690	3e-22	29	gb|TGME49_048570	2e-15	24	ECCG_01131T0	1e-10	26	gi|16803844	6e-11	21	SAAG_01832T0	7e-11	18	TBCT_02860.1	2e-05	0	CAWT_03286	2e-16	21	HCAG_10759T0
	AF054	Tropomyosin family	Q7M3Y8	Tur c 1	146	A	NA			Bm1_02060	4e-13	39	LOAG_08281T0	2e-23	44	WUBG_08909T0	4e-17	51	Smp_044010	5e-35	47	psu|PF10_0356	4e-07	34	Tc00.1047053506491.20	4e-07	27	psu|LmjF34.0690	6e-08	26	gb|TGME49_112070	9e-11	31	ECCG_03531T0	0.0003	0	gi|16803844	5e-06	0	SAAG_01884T0	2e-06	0	TBCT_01635.1	0.074	0	CAWT_03286	3e-07	23	HCAG_10759T0
	AF055	Calreticulin family	Q2TL59	Pen ch 31	557	A	NA			Bm1_45355	1e-113	46	LOAG_00322T0	1e-112	48	WUBG_04579T0	5e-84	46	Smp_043150	1e-114	47	psu|PFA0410w	0.0007	0	Tc00.1047053509011.40	9e-62	35	psu|LmjF31.2600	6e-60	34	gb|TGME49_110320	2e-29	40	ECCG_01131T0	0.008	0	gi|16804753	0.092	0	SAAG_00452T0	0.0007	0	TBCT_01497.1	0.031	0	CAWT_03398	1e-104	47	HCAG_06060T0
	AF056	Serum albumin	P02769	Bos d 6	607	A	no	4	20860558	Bm1_37045	0.13	0	LOAG_05924T0	2	0	WUBG_01138T0	0.31	0	Smp_170710	5.4	0	psu|PFI0005w	0.018	0	Tc00.1047053510901.210	1.2	0	psu|LmjF22.0640	0.32	0	gb|TGME49_087960	1.4	0	ECCG_04538T0	3.1	0	gi|16803345	1.5	0	SAAG_01500T0	0.12	0	TBCT_02721.1	3.2	0	CAWT_04452	0.62	0	HCAG_04702T0
	AF056	Serum albumin	P49822	Can f 3	608	A	no	25	20621650	Bm1_14520	0.17	0	LOAG_07271T0	0.52	0	WUBG_09250T0	0.4	0	Smp_105950	2.4	0	psu|PF14_0403	0.052	0	Tc00.1047053507641.30	1.2	0	psu|LmjF24.1810	0.32	0	gb|TGME49_078440	0.37	0	ECCG_01955T0	0.83	0	gi|16802245	0.51	0	SAAG_01333T0	1.3	0	TBCT_00992.1	12	0	CAWT_05832	2.4	0	HCAG_06772T0
	AF056	Serum albumin	P35747	Equ c 3	607	A	no	18	8774348	Bm1_44055	0.37	0	LOAG_01311T0	0.061	0	WUBG_09250T0	0.52	0	Smp_025750	1.9	0	psu|PF07_0006	2.2	0	Tc00.1047053506337.140	0.71	0	psu|LmjF33.1730	1.2	0	gb|TGME49_006380	1.4	0	ECCG_01955T0	2.4	0	gi|16802425	2.5	0	SAAG_01500T0	1.7	0	TBCT_00992.1	1.1	0	CAWT_00030	1.1	0	HCAG_03520T0
	AF056	Serum albumin	P49064	Fel d 2	608	A	no	14	9105522	Bm1_14145	0.17	0	LOAG_00611T0	0.061	0	WUBG_11543T0	0.14	0	Smp_156080	7.1	0	psu|PF14_0403	0.26	0	Tc00.1047053503981.60	4.6	0	psu|LmjF24.1810	1.6	0	gb|TGME49_076120	0.37	0	ECCG_03668T0	0.83	0	gi|16802245	1.9	0	SAAG_00014T0	2.2	0	TBCT_00357.1	5.5	0	CAWT_01247	1.8	0	HCAG_10304T0
	AF056	Serum albumin	P19121	Gal d 4	615	A	no	37	20633029	Bm1_23280	0.38	0	LOAG_08379T0	1.2	0	WUBG_01138T0	0.31	0	Smp_128440	2.5	0	psu|PFL0020w	0.15	0	Tc00.1047053506825.180	0.42	0	psu|LmjF32.1495	3.6	0	gb|TGME49_068710	1.4	0	ECCG_02513T0	7.1	0	gi|16804067	0.51	0	SAAG_02403T0	0.77	0	TBCT_02586.1	4.3	0	CAWT_04086	0.82	0	HCAG_02658T0
	AF057	Polygalacturonase	Q7M1E7	Cha o 2	514	P	yes	82	10486272	Bm1_25290	2.6	0	LOAG_09942T0	0.95	0	WUBG_07732T0	0.43	0	Smp_142250	9.9	0	psu|PF11_0385	5.2	0	Tc00.1047053506375.50	8.5	0	psu|LmjF17.0725	1.3	0	gb|TGME49_072540	1.1	0	ECCG_01460T0	0.14	0	gi|16803949	0.93	0	SAAG_01182T0	2.4	0	TBCT_02156.1	4.6	0	CAWT_04158	0.39	0	HCAG_03237T0
	AF057	Polygalacturonase	P43212	Cry j 2	514	P	yes	95	8564723	Bm1_10230	0.18	0	LOAG_02870T0	0.11	0	WUBG_07732T0	0.19	0	Smp_135420	1.2	0	psu|PF11_0435	0.36	0	Tc00.1047053504115.100	1	0	psu|LmjF30.2980	0.99	0	gb|TGME49_023060	1.9	0	ECCG_00876T0	0.4	0	gi|16804619	1.6	0	SAAG_01347T0	0.37	0	TBCT_00958.1	4.6	0	CAWT_02402	5.6	0	HCAG_09100T0
	AF057	Polygalacturonase	A0T2M4	Cup a 2	384	P	NA			Bm1_36345	0.82	0	LOAG_09798T0	0.18	0	WUBG_18382T0	0.081	0	Smp_071770	2.4	0	psu|PF11_0342	0.56	0	Tc00.1047053510329.160	0.41	0	psu|LmjF17.0725	0.24	0	gb|TGME49_084580	3.9	0	ECCG_04062T0	0.83	0	gi|16804836	0.39	0	SAAG_02287T0	2.9	0	TBCT_03568.1	0.86	0	CAWT_04393	1.8	0	HCAG_01300T0
	AF057	Polygalacturonase	Q9FY19	Jun a 2	507	P	yes	100	10944464	Bm1_43320	2.6	0	LOAG_09798T0	0.14	0	WUBG_18382T0	0.11	0	Smp_005160	9.8	0	psu|MAL8P1.82	0.011	0	Tc00.1047053511859.60	0.75	0	psu|LmjF04.0350	1.7	0	gb|TGME49_084580	4.3	0	ECCG_04062T0	1.5	0	gi|16804836	0.7	0	SAAG_02287T0	4	0	TBCT_02266.1	0.91	0	CAWT_05407	1.9	0	HCAG_01300T0
	AF057	Polygalacturonase	Q9XG86	Phl p 13	394	P	yes	56	18339006	Bm1_10025	0.004	0	LOAG_02284T0	0.53	0	WUBG_12731T0	0.11	0	Smp_130810	9.2	0	psu|MAL7P1.156	0.2	0	Tc00.1047053503973.280	0.19	0	psu|LmjF09.1260	6.1	0	gb|TGME49_056830	0.48	0	ECCG_04010T0	0.29	0	gi|16802568	0.4	0	SAAG_00089T0	0.071	0	TBCT_00786.1	1.2	0	CAWT_00757	0.17	0	HCAG_04199T0
	AF057	Polygalacturonase	Q6H9K0	Pla a 2	377	P	yes	92	11906336	Bm1_50860	0.073	0	LOAG_08578T0	0.059	0	WUBG_11438T0	2	0	Smp_057790	1	0	psu|PF11_0154	0.038	0	Tc00.1047053504109.20	3.4	0	psu|LmjF11.0890	4.4	0	gb|TGME49_058400	0.024	0	ECCG_01472T0	0.47	0	gi|16803604	3.2	0	SAAG_01658T0	1.7	0	TBCT_02156.1	0.64	0	CAWT_00640	2.3	0	HCAG_04199T0
	AF057	Polygalacturonase	Q1ZYQ7	Zea m 13	410	P	NA			Bm1_10025	0.11	0	LOAG_03765T0	3.6	0	WUBG_00506T0	1.3	0	Smp_140410	4.4	0	psu|PF14_0149	0.042	0	Tc00.1047053507803.40	0.76	0	psu|LmjF32.0990	0.089	0	gb|TGME49_011270	1.5	0	ECCG_02986T0	0.4	0	gi|16802178	0.085	0	SAAG_01487T0	0.034	0	TBCT_00120.1	0.92	0	CAWT_00315	0.3	0	HCAG_02309T0
	AF058	Ribosomal protein L3	Q8NKF4	Asp f 23	392	F	no	26	12974759	Bm1_13895	1e-155	64	LOAG_10407T0	1e-153	65	WUBG_05976T0	1e-155	64	Smp_047200.3	1e-145	61	psu|PF10_0272	1e-144	61	Tc00.1047053510879.110	1e-132	56	psu|LmjF34.2900	1e-129	55	gb|TGME49_027360	1e-157	66	ECCG_03726T0	1.1	0	gi|16804670	3e-05	0	SAAG_00079T0	2e-05	0	TBCT_00691.1	0.39	0	CAWT_06020	0	76	HCAG_03923T0
	AF059	Class A pollen coat protein	Q84ZX5	Art v 1	132	P	yes	70	2395437	Bm1_22885	5e-08	41	LOAG_00403T0	7e-07	46	WUBG_01785T0	5e-06	0	Smp_068720	2e-07	50	psu|PFD0005w	0.009	0	Tc00.1047053507379.9	1e-05	0	psu|LmjF22.1070	2e-07	50	gb|TGME49_110570	1e-06	0	ECCG_04174T0	0.009	0	gi|16802207	0.028	0	SAAG_00318T0	0.002	0	TBCT_02528.1	5e-07	46	CAWT_00722	0.0001	0	HCAG_06848T0
	AF060	Thaumatin-like protein	P81370	Act d 2	225	P	yes	80	12417892	Bm1_50780	0.23	0	LOAG_08637T0	0.01	0	WUBG_01675T0	0.26	0	Smp_158880	2.3	0	psu|PFI1335w	0.45	0	Tc00.1047053504625.70	0.25	0	psu|LmjF08.0390	1.2	0	gb|TGME49_066770	2.4	0	ECCG_02082T0	2	0	gi|16802181	6.2	0	SAAG_00482T0	0.5	0	TBCT_00923.1	1.2	0	CAWT_00712	5.5	0	HCAG_09520T0
	AF060	Thaumatin-like protein	Q8H995	Cry j 3	233	P	no	27	17441795	Bm1_19790	0.24	0	LOAG_01742T0	1.7	0	WUBG_06137T0	0.21	0	Smp_124240	2.5	0	psu|PFE1525w	0.62	0	Tc00.1047053511867.130	0.45	0	psu|LmjF06.0780	0.2	0	gb|TGME49_070880	0.18	0	ECCG_03518T0	0.33	0	gi|16803076	6.6	0	SAAG_01877T0	0.24	0	TBCT_01591.1	0.76	0	CAWT_05072	1.2	0	HCAG_00386T0
	AF060	Thaumatin-like protein	Q9FY35	Cup a 3	199	P	yes	63	15080828	Bm1_35630	1.2	0	LOAG_06652T0	0.031	0	WUBG_09643T0	1.8	0	Smp_150770	0.29	0	psu|PFI1335w	1.4	0	Tc00.1047053506739.99	3.8	0	psu|LmjF30.1330	0.46	0	gb|TGME49_055460	0.18	0	ECCG_00339T0	3.7	0	gi|16803704	3.1	0	SAAG_01240T0	0.72	0	TBCT_02720.1	1.3	0	CAWT_04791	0.083	0	HCAG_10949T0
	AF060	Thaumatin-like protein	Q69CS2	Cup s 3	225	P	yes	69	17042139	Bm1_16630	2	0	LOAG_06652T0	0.038	0	WUBG_17718T0	2.2	0	Smp_150770	0.095	0	psu|PF14_0512	2.2	0	Tc00.1047053506281.35	1.6	0	psu|LmjF30.1330	0.55	0	gb|TGME49_055460	0.22	0	ECCG_00339T0	7.7	0	gi|16803704	3.7	0	SAAG_01240T0	3.2	0	TBCT_02720.1	1.2	0	CAWT_04791	0.1	0	HCAG_10949T0
	AF060	Thaumatin-like protein	P81295	Jun a 3	225	P	no	43	10657673	Bm1_15695	3.3	0	LOAG_06652T0	0.084	0	WUBG_17718T0	1.7	0	Smp_150770	0.12	0	psu|PF14_0108	1.7	0	Tc00.1047053506281.35	2.1	0	psu|LmjF30.1330	0.32	0	gb|TGME49_055460	0.13	0	ECCG_00339T0	5.9	0	gi|16803424	2.8	0	SAAG_00311T0	5.5	0	TBCT_00537.1	1.6	0	CAWT_04791	0.13	0	HCAG_06058T0
	AF060	Thaumatin-like protein	Q3BCT6	Mal d 2	246	P	yes	75	12787673	Bm1_41340	0.004	0	LOAG_13684T0	4	0	WUBG_14092T0	0.65	0	Smp_135210	0.25	0	psu|MAL13P1.278	0.88	0	Tc00.1047053508221.1050	0.49	0	psu|LmjF12.1190	0.22	0	gb|TGME49_086280	0.023	0	ECCG_03587T0	0.79	0	gi|16803704	0.22	0	SAAG_02048T0	4.8	0	TBCT_01868.1	1.1	0	CAWT_01572	0.44	0	HCAG_00689T0
	AF060	Thaumatin-like protein	P50694	Pru av 2	245	P	no	50	16499648	Bm1_41340	0.006	0	LOAG_02273T0	0.073	0	WUBG_04263T0	1.1	0	Smp_130470	1.2	0	psu|PFI0980w	3.3	0	Tc00.1047053511653.20	1.1	0	psu|LmjF04.0180	0.37	0	gb|TGME49_042890	0.029	0	ECCG_03031T0	1.3	0	gi|16804231	9.2	0	SAAG_01347T0	2.8	0	TBCT_03581.1	0.48	0	CAWT_02758	2.2	0	HCAG_01827T0
	AF061	Prolyl oligopeptidase family	Q9UW98	Tri r 4	726	F	NA			Bm1_43100	9e-08	23	LOAG_01701T0	7e-08	26	WUBG_03538T0	3e-07	21	Smp_057530	0.042	0	psu|PFC0950c	0.01	0	Tc00.1047053506945.190	3.3	0	psu|LmjF31.1180	1.1	0	gb|TGME49_046800	7e-07	24	ECCG_01819T0	0.008	0	gi|16802208	6.8	0	SAAG_02511T0	0.92	0	TBCT_02107.1	0.36	0	CAWT_01874	0.001	0	HCAG_00721T0
	AF061	Prolyl oligopeptidase family	B1A4F7	Ves v 3	776	A	yes	57	20348419	Bm1_48250	1e-75	29	LOAG_00435T0	1e-81	28	WUBG_16621T0	9e-35	38	Smp_057530	3e-59	25	psu|PFB0880w	0.2	0	Tc00.1047053510183.20	7e-18	29	psu|LmjF36.2420	3e-18	24	gb|TGME49_045500	3e-10	37	ECCG_01819T0	0.49	0	gi|16802450	0.87	0	SAAG_00019T0	1.3	0	TBCT_02472.1	2.5	0	CAWT_04678	3e-68	29	HCAG_04449T0
	AF062	Histidine acid phosphatase	B6E2X9	Api m 3	388	A	no	37	16630944	Bm1_50155	1e-24	27	LOAG_03480T0	2e-23	27	WUBG_11454T0	3e-11	39	Smp_123670	5e-19	25	psu|PFE0635c	0.018	0	Tc00.1047053503431.60	0.0002	0	psu|LmjF36.2470	0.01	0	gb|TGME49_027650	1.1	0	ECCG_01422T0	0.49	0	gi|16802871	2	0	SAAG_02441T0	0.008	0	TBCT_03269.1	7.3	0	CAWT_05989	1.1	0	HCAG_02189T0
	AF063	Beta-1,3-glucanase	Q94G86	Ole e 9	460	P	yes	61	11373288	Bm1_14115	0.27	0	LOAG_06075T0	1.4	0	WUBG_01604T0	0.077	0	Smp_179190	3.9	0	psu|PFL1445w	1.6	0	Tc00.1047053511649.120	0.51	0	psu|LmjF25.1630	0.035	0	gb|TGME49_070850	7e-15	25	ECCG_02578T0	0.093	0	gi|16802309	0.026	0	SAAG_02183T0	0.95	0	TBCT_02481.1	0.21	0	CAWT_03569	5e-05	0	HCAG_05291T0
	AF064	X8 domain	Q84V39	Ole e 10	123	P	yes	55	15004167	Bm1_01890	0.007	0	LOAG_02673T0	0.012	0	WUBG_12662T0	0.001	0	Smp_068720	4	0	psu|MAL7P1.212	0.013	0	Tc00.1047053509693.140	0.011	0	psu|LmjF14.0420	0.077	0	gb|TGME49_024480	0.006	0	ECCG_02885T0	0.11	0	gi|16802207	0.072	0	SAAG_00889T0	0.14	0	TBCT_02447.1	0.04	0	CAWT_01343	3e-05	0	HCAG_05285T0
	AF065	Alpha/beta casein	P02662	Bos d 8 alphaS1	214	A	yes	82	19454699	Bm1_45670	0.12	0	LOAG_02915T0	0.39	0	WUBG_08074T0	0.11	0	Smp_148130	1.3	0	psu|PF10_0374	0.003	0	Tc00.1047053509647.50	0.39	0	psu|LmjF14.1120	0.079	0	gb|TGME49_084620	0.45	0	ECCG_01346T0	0.077	0	gi|16803399	0.53	0	SAAG_01832T0	0.032	0	TBCT_01860.1	3.3	0	CAWT_02032	0.093	0	HCAG_01188T0
	AF066	Haemocyanin	Q25641	Per a 3	685	A	yes	94.5	9182871	Bm1_22790	0.96	0	LOAG_11034T0	0.77	0	WUBG_07947T0	0.041	0	Smp_014610	0.051	0	psu|PFL1455w	0.13	0	Tc00.1047053511421.100	3.1	0	psu|LmjF31.0210	1.1	0	gb|TGME49_095080	10	0	ECCG_03899T0	4.7	0	gi|16803986	0.76	0	SAAG_01412T0	0.51	0	TBCT_00802.1	8.3	0	CAWT_00096	0.32	0	HCAG_09035T0
	AF068	Transferrin	P02789	Gal d 3	705	A	no	13	20633029	Bm1_35120	0.2	0	LOAG_02273T0	0.032	0	WUBG_02121T0	0.81	0	Smp_151060	2e-72	30	psu|PFI1280c	0.68	0	Tc00.1047053511589.90	0.38	0	psu|LmjF35.1020	1.1	0	gb|TGME49_058070	0.2	0	ECCG_01792T0	3.7	0	gi|16804326	0.35	0	SAAG_00626T0	0.002	0	TBCT_02667.1	2.9	0	CAWT_05443	0.33	0	HCAG_05804T0
	AF069	Bet v 1-related protein	P38948	Aln g 1	160	P	yes	65	20210809	Bm1_49665	0.13	0	LOAG_12305T0	0.4	0	WUBG_03550T0	0.11	0	Smp_146950	0.69	0	psu|PF14_0637	0.039	0	Tc00.1047053507539.40	0.67	0	psu|LmjF04.0810	0.53	0	gb|TGME49_033250	0.46	0	ECCG_01969T0	0.18	0	gi|16804448	0.2	0	SAAG_01783T0	0.3	0	TBCT_03499.1	0.96	0	CAWT_02368	0.13	0	HCAG_06577T0
	AF069	Bet v 1 -related family	P49372	Api g 1	154	P	yes	100	10452775	Bm1_39130	2.3	0	LOAG_13158T0	0.49	0	WUBG_09289T0	1.5	0	Smp_000680	16	0	psu|PF14_0413	3.4	0	Tc00.1047053504137.50	0.62	0	psu|LmjF35.1450	0.83	0	gb|TGME49_023840	6.1	0	ECCG_03362T0	0.17	0	gi|16804125	0.24	0	SAAG_02445T0	0.22	0	TBCT_03593.1	0.18	0	CAWT_04989	0.58	0	HCAG_01743T0
	AF069	Bet v 1 -related family	B1PYZ4	Ara h 8	157	P	yes	85	15577846	Bm1_40685	0.056	0	LOAG_02848T0	0.39	0	WUBG_09016T0	0.92	0	Smp_030920.2	16	0	psu|PFI1475w	2	0	Tc00.1047053510303.50	0.64	0	psu|LmjF31.3030	4.3	0	gb|TGME49_088680	0.75	0	ECCG_03176T0	0.046	0	gi|16804701	0.32	0	SAAG_01630T0	0.17	0	TBCT_00195.1	2.1	0	CAWT_03780	0.36	0	HCAG_02135T0
	AF069	Bet v 1 -related family	Q42499	Bet v 1	160	P	yes	91	21251701	Bm1_37570	0.84	0	LOAG_03908T0	2.6	0	WUBG_13478T0	1.6	0	Smp_057410	0.9	0	psu|PF14_0637	0.19	0	Tc00.1047053506485.60	0.87	0	psu|LmjF31.1360	0.53	0	gb|TGME49_102850	11	0	ECCG_02134T0	1.2	0	gi|16803128	0.44	0	SAAG_00662T0	0.3	0	TBCT_01870.1	0.086	0	CAWT_01122	0.22	0	HCAG_06678T0
	AF069	Bet v 1-related protein	P38950	Car b 1	160	P	NA			Bm1_28595	0.17	0	LOAG_15238T0	0.23	0	WUBG_07188T0	0.067	0	Smp_057410	2	0	psu|PFF1260c	0.15	0	Tc00.1047053509753.100	0.1	0	psu|LmjF04.0810	1.2	0	gb|TGME49_073760	1.3	0	ECCG_04568T0	0.7	0	gi|16802669	0.26	0	SAAG_02313T0	0.079	0	TBCT_01870.1	0.066	0	CAWT_00169	0.83	0	HCAG_01064T0
	AF069	Bet v 1 -related family	B7TWE5	Cas s 1	159	P	yes	100	7504464	Bm1_19880	0.49	0	LOAG_09876T0	0.69	0	WUBG_09276T0	0.56	0	Smp_143970	2	0	psu|PF11_0044	0.55	0	Tc00.1047053511277.440	0.86	0	psu|LmjF20.0220	3.4	0	gb|TGME49_106660	1	0	ECCG_03130T0	0.11	0	gi|16802349	0.051	0	SAAG_00637T0	0.39	0	TBCT_00146.1	0.42	0	CAWT_05879	0.21	0	HCAG_04211T0
	AF069	Bet v 1 family	Q39453	Cor a 1	160	P	yes	100	11898007	Bm1_49665	0.058	0	LOAG_09314T0	0.14	0	WUBG_03550T0	0.051	0	Smp_057410	1.2	0	psu|PF14_0637	0.05	0	Tc00.1047053506789.190	0.67	0	psu|LmjF28.0140	1.5	0	gb|TGME49_024260	0.78	0	ECCG_01242T0	0.7	0	gi|16804448	0.088	0	SAAG_02633T0	0.87	0	TBCT_03499.1	0.023	0	CAWT_02368	0.001	0	HCAG_06678T0
	AF069	Bet v 1 family	Q8SAE7	Dau c 1	154	P	yes	100	10336602	Bm1_48035	0.12	0	LOAG_06068T0	0.84	0	WUBG_11596T0	0.3	0	Smp_018240.1	4.1	0	psu|PFI1475w	0.52	0	Tc00.1047053507611.199	0.16	0	psu|LmjF12.0230	1.4	0	gb|TGME49_078780	0.93	0	ECCG_01926T0	0.49	0	gi|16803438	0.54	0	SAAG_00418T0	0.026	0	TBCT_03643.1	0.0004	0	CAWT_03211	0.34	0	HCAG_07263T0
	AF069	Bet v 1 -related family	Q3T923	Fag s 1	160	P	NA			Bm1_09180	0.22	0	LOAG_01708T0	0.31	0	WUBG_08596T0	0.33	0	Smp_148120	17	0	psu|MAL7P1.17	0.19	0	Tc00.1047053507993.40	0.079	0	psu|LmjF25.1340	0.048	0	gb|TGME49_046210	0.16	0	ECCG_03130T0	0.91	0	gi|16804013	0.98	0	SAAG_00373T0	0.18	0	TBCT_01686.1	1.6	0	CAWT_04756	0.13	0	HCAG_08461T0
	AF069	Bet v 1 -related family	B7TWE6	Fas s 1	160	P	NA			Bm1_48125	1.4	0	LOAG_09584T0	0.68	0	WUBG_12100T0	3.6	0	Smp_151280.1	4.5	0	psu|PF14_0501	1.2	0	Tc00.1047053507063.290	3.3	0	psu|LmjF26.2380	1.5	0	gb|TGME49_104720	1.3	0	ECCG_03130T0	0.31	0	gi|16802294	0.26	0	SAAG_02044T0	0.87	0	TBCT_00478.1	0.96	0	CAWT_00870	1.4	0	HCAG_04211T0
	AF069	Bet v 1 -related family	Q4VPK7	Mal d 1	160	P	yes	100	7677763	Bm1_09180	0.13	0	LOAG_02889T0	0.036	0	WUBG_14448T0	1.6	0	Smp_155200	50	0	psu|MAL7P1.30	0.33	0	Tc00.1047053506459.130	4.3	0	psu|LmjF33.2550	0.69	0	gb|TGME49_044880	1.3	0	ECCG_03130T0	0.082	0	gi|16802750	0.34	0	SAAG_02148T0	1.1	0	TBCT_00470.1	2.8	0	CAWT_02020	0.37	0	HCAG_02176T0
	AF069	Bet v 1-related protein	O50001	Pru ar 1	160	P	NA			Bm1_28595	2.5	0	LOAG_02889T0	0.003	0	WUBG_09396T0	2.1	0	Smp_060010	17	0	psu|PF10_0292	0.086	0	Tc00.1047053508465.140	2.5	0	psu|LmjF25.0170	0.9	0	gb|TGME49_057180	0.46	0	ECCG_02842T0	0.063	0	gi|16804070	0.088	0	SAAG_00844T0	0.3	0	TBCT_00045.1	0.19	0	CAWT_05097	5.4	0	HCAG_02012T0
	AF069	Bet v 1-related protein	O24248	Pru av 1	160	P	yes	96	11295665	Bm1_09180	0.012	0	LOAG_05865T0	0.003	0	WUBG_17636T0	0.43	0	Smp_149080	17	0	psu|PF11_0346	0.25	0	Tc00.1047053504431.64	5.6	0	psu|LmjF12.0310	0.53	0	gb|TGME49_046210	0.2	0	ECCG_03130T0	0.048	0	gi|16803117	0.2	0	SAAG_01914T0	0.079	0	TBCT_00045.1	1.2	0	CAWT_01122	0.37	0	HCAG_04211T0
	AF069	Bet v 1-related protein	B6CQR7	Pru du 1	160	P	NA			Bm1_09180	0.17	0	LOAG_02889T0	0.028	0	WUBG_01702T0	0.15	0	Smp_145070	7.7	0	psu|PF14_0210	0.56	0	Tc00.1047053504199.10	1.5	0	psu|LmjF36.2180	0.53	0	gb|TGME49_046210	0.014	0	ECCG_03130T0	0.048	0	gi|16804803	0.34	0	SAAG_01914T0	0.18	0	TBCT_03643.1	3.6	0	CAWT_01122	0.17	0	HCAG_04211T0
	AF069	Bet v 1-related protein	B6CQR8	Pru p 1	160	P	NA		18384093	Bm1_09180	0.045	0	LOAG_02889T0	0.028	0	WUBG_01702T0	0.33	0	Smp_135060	7.7	0	psu|PF10_0292	1.2	0	Tc00.1047053508741.200	2.5	0	psu|LmjF36.2180	0.53	0	gb|TGME49_046210	0.024	0	ECCG_03130T0	0.048	0	gi|16804803	0.34	0	SAAG_01914T0	0.079	0	TBCT_03643.1	1.6	0	CAWT_01122	0.098	0	HCAG_04211T0
	AF069	Bet v 1-related protein	B6RQS2	Que a 1	160	P	NA		9802365	Bm1_19880	0.045	0	LOAG_00035T0	0.23	0	WUBG_09276T0	0.051	0	Smp_143970	17	0	psu|PFB0815w	1.2	0	Tc00.1047053506247.140	0.51	0	psu|LmjF27.0510	2.6	0	gb|TGME49_000380	1	0	ECCG_02756T0	1.2	0	gi|16802890	0.2	0	SAAG_01587T0	0.035	0	TBCT_03608.1	1.2	0	CAWT_03780	0.22	0	HCAG_02487T0
	AF070	60S acidic ribosomal protein	P49148	Alt a 12	110	F	NA			Bm1_04915	4e-27	59	LOAG_09563T0	9e-25	54	WUBG_06622T0	1e-26	57	Smp_041980	2e-20	48	psu|PF11_0043	8e-13	37	Tc00.1047053510823.70	2e-14	44	psu|LmjF15.0380	3e-15	43	gb|TGME49_060260	6e-21	51	ECCG_03000T0	0.55	0	gi|16804637	0.21	0	SAAG_00163T0	0.039	0	TBCT_01583.1	1.3	0	CAWT_01083	6e-23	55	HCAG_05533T0
	AF070	60S acidic ribosomal protein	P42037	Alt a 5	113	F	no	14	9693275	Bm1_49630	2e-26	52	LOAG_12589T0	3e-17	37	WUBG_10584T0	2e-28	54	Smp_029820	1e-26	55	psu|PFC0400w	4e-19	44	Tc00.1047053505977.26	1e-20	46	psu|LmjF30.3730	1e-22	50	gb|TGME49_109810	9e-23	47	ECCG_03097T0	0.032	0	gi|16803443	0.18	0	SAAG_01568T0	0.12	0	TBCT_03800.1	0.0001	0	CAWT_02781	5e-36	68	HCAG_02703T0
	AF070	60S acidic ribosomal protein	Q9UUZ6	Asp f 8	111	F	no	10	10224291	Bm1_49630	1e-26	52	LOAG_12589T0	4e-19	40	WUBG_10584T0	8e-28	53	Smp_029820	2e-24	51	psu|PFC0400w	7e-22	49	Tc00.1047053506595.100	2e-21	49	psu|LmjF30.3730	1e-24	51	gb|TGME49_109810	2e-26	50	ECCG_03097T0	0.039	0	gi|16803396	0.17	0	SAAG_00958T0	0.008	0	TBCT_00646.1	0.009	0	CAWT_02781	6e-39	73	HCAG_02703T0
	AF070	60S acidic ribosomal protein	P50344	Cla h 12	110	F	NA			Bm1_04915	5e-27	56	LOAG_09563T0	1e-25	53	WUBG_06622T0	9e-27	53	Smp_041980	6e-20	47	psu|PF11_0043	1e-13	41	Tc00.1047053510823.70	8e-18	50	psu|LmjF03.0440	1e-16	44	gb|TGME49_060260	4e-22	48	ECCG_01716T0	0.086	0	gi|16803410	0.62	0	SAAG_02088T0	0.051	0	TBCT_00283.1	0.005	0	CAWT_01083	4e-27	63	HCAG_05533T0
	AF070	60S acidic ribosomal protein	P42039	Cla h 5	111	F	no	22	7898496	Bm1_49630	9e-24	50	LOAG_12589T0	6e-18	37	WUBG_10584T0	5e-25	50	Smp_029820	1e-23	52	psu|PFC0400w	2e-19	44	Tc00.1047053505977.26	3e-19	39	psu|LmjF15.1207	6e-21	43	gb|TGME49_109810	2e-25	47	ECCG_03540T0	0.2	0	gi|16802297	0.13	0	SAAG_00958T0	0.008	0	TBCT_03506.1	0.015	0	CAWT_02781	2e-35	68	HCAG_02703T0
	AF070	60S acidic ribosomal protein	Q8TFM9	Fus c 1	109	F	no	35	12695122	Bm1_49630	7e-26	53	LOAG_12589T0	6e-18	39	WUBG_10584T0	1e-27	55	Smp_029820	7e-24	50	psu|PFC0400w	1e-21	46	Tc00.1047053505977.26	1e-20	47	psu|LmjF30.3730	3e-23	50	gb|TGME49_109810	2e-23	50	ECCG_01086T0	0.19	0	gi|16802580	0.093	0	SAAG_01208T0	0.71	0	TBCT_01932.1	0.014	0	CAWT_02781	1e-37	71	HCAG_02703T0
	AF071	Xylanase	P55329	Asp n Hemicellulase	211	F	NA			Bm1_06080	1	0	LOAG_02639T0	0.13	0	WUBG_03288T0	3.4	0	Smp_094130	1.2	0	psu|PF11_0353	3.5	0	Tc00.1047053507821.130	0.02	0	psu|LmjF13.1100	1.9	0	gb|TGME49_027300	2.2	0	ECCG_00653T0	0.49	0	gi|16804798	0.18	0	SAAG_00476T0	0.35	0	TBCT_01821.1	1.1	0	CAWT_03493	0.16	0	HCAG_02133T0
	AF073	Pectate Lyase	P27759	Amb a 1	396	P	yes	90	16650052	Bm1_30380	2.5	0	LOAG_09059T0	0.18	0	WUBG_12703T0	1.6	0	Smp_061480	21	0	psu|MAL13P1.246	0.26	0	Tc00.1047053507587.24	0.11	0	psu|LmjF24.1420	1.6	0	gb|TGME49_040350	0.83	0	ECCG_04462T0	0.23	0	gi|16803507	0.24	0	SAAG_02566T0	0.61	0	TBCT_00049.1	0.23	0	CAWT_05820	0.17	0	HCAG_02971T0
	AF073	Pectate Lyase	P27762	Amb a 2	397	P	yes	90	16650052	Bm1_15665	1.1	0	LOAG_07411T0	3.5	0	WUBG_06916T0	2.1	0	Smp_138350	12	0	psu|PFL1990c	8.4	0	Tc00.1047053503849.40	4.7	0	psu|LmjF32.0510	0.05	0	gb|TGME49_054530	9.2	0	ECCG_03159T0	0.027	0	gi|16803435	3.4	0	SAAG_00335T0	5.1	0	TBCT_00585.1	2	0	CAWT_05820	1.4	0	HCAG_06418T0
	AF073	Pectate Lyase	A0PJ16	Art v 6	396	P	no	0	18925891	Bm1_30475	5.5	0	LOAG_05194T0	4.5	0	WUBG_00544T0	0.19	0	Smp_040970.1	12	0	psu|PFL1950w	1.3	0	Tc00.1047053505779.10	0.55	0	psu|LmjF30.1950	0.72	0	gb|TGME49_018470	3.1	0	ECCG_03159T0	0.078	0	gi|16804482	1.2	0	SAAG_00946T0	3.9	0	TBCT_00204.1	0.88	0	CAWT_02192	1.4	0	HCAG_09870T0
	AF073	Pectate Lyase	Q96385	Cha o 1	375	P	yes	97	10486272	Bm1_37970	1	0	LOAG_10861T0	1.9	0	WUBG_00602T0	0.67	0	Smp_174270	1.7	0	psu|PF13_0339	0.084	0	Tc00.1047053506221.120	0.67	0	psu|LmjF34.1290	1.1	0	gb|TGME49_049010	0.59	0	ECCG_04223T0	0.12	0	gi|16802195	0.85	0	SAAG_01260T0	2.2	0	TBCT_01709.1	0.29	0	CAWT_05038	1	0	HCAG_08070T0
	AF073	Pectate Lyase	P18632	Cry j 1	374	P	yes	96	8564723	Bm1_00975	0.16	0	LOAG_10861T0	0.64	0	WUBG_18264T0	0.3	0	Smp_169400	3.9	0	psu|PF08_0082	0.71	0	Tc00.1047053510329.160	3.3	0	psu|LmjF27.0410	2.5	0	gb|TGME49_095030	8.5	0	ECCG_00629T0	5.2	0	gi|16802284	0.076	0	SAAG_02439T0	1.3	0	TBCT_03090.1	0.13	0	CAWT_05725	2.2	0	HCAG_02916T0
	AF073	Pectate Lyase	Q93XL6	Cup a 1	367	P	yes	57	11576077	Bm1_13930	1.7	0	LOAG_08080T0	1.4	0	WUBG_09843T0	1.4	0	Smp_138940	0.99	0	psu|PF10_0079	0.14	0	Tc00.1047053503893.150	0.077	0	psu|LmjF19.0290	3.2	0	gb|TGME49_095030	2.2	0	ECCG_04223T0	1	0	gi|16802134	1.8	0	SAAG_00142T0	1.6	0	TBCT_03090.1	0.095	0	CAWT_00682	1.3	0	HCAG_05550T0
	AF073	Pectate Lyase	Q9M4S3	Cup s 1	367	P	NA			Bm1_00975	2.9	0	LOAG_07617T0	1.8	0	WUBG_09843T0	0.22	0	Smp_144050	2.9	0	psu|PF10_0186	0.11	0	Tc00.1047053503893.150	0.38	0	psu|LmjF18.1500	9.4	0	gb|TGME49_088940	1.7	0	ECCG_04223T0	1	0	gi|16803094	1.1	0	SAAG_00125T0	0.55	0	TBCT_03090.1	0.12	0	CAWT_03541	1.7	0	HCAG_01538T0
	AF073	Pectate Lyase	P81294	Jun a 1	367	P	yes	71	10482835	Bm1_50860	3.8	0	LOAG_07151T0	1.8	0	WUBG_09843T0	1.1	0	Smp_138940	0.76	0	psu|PFL1865w	0.31	0	Tc00.1047053503893.150	0.077	0	psu|LmjF04.0190	2.5	0	gb|TGME49_003440	1.3	0	ECCG_04223T0	3	0	gi|16802134	1.8	0	SAAG_01260T0	1.2	0	TBCT_03090.1	0.095	0	CAWT_03541	0.15	0	HCAG_05550T0
	AF073	Pectate Lyase	Q9LLT1	Jun v 1	367	P	yes	92	11422137	Bm1_28135	3.8	0	LOAG_10861T0	5.4	0	WUBG_09843T0	1.1	0	Smp_138940	6.4	0	psu|PFF0095c	0.24	0	Tc00.1047053503893.150	0.077	0	psu|LmjF03.0620	3.2	0	gb|TGME49_030690	0.75	0	ECCG_04223T0	3	0	gi|16802625	3.1	0	SAAG_02366T0	0.42	0	TBCT_03090.1	0.36	0	CAWT_02272	1.3	0	HCAG_01538T0
	AF073	Pectate Lyase	A2I7W3	Pen c 32	290	F	NA			Bm1_07550	0.97	0	LOAG_01938T0	0.36	0	WUBG_11223T0	0.62	0	Smp_025890	4.6	0	psu|MAL7P1.171	0.003	0	Tc00.1047053506329.20	2.4	0	psu|LmjF30.2950	0.48	0	gb|TGME49_023260	0.11	0	ECCG_01895T0	0.76	0	gi|16802207	0.8	0	SAAG_00655T0	0.32	0	TBCT_03431.1	0.78	0	CAWT_03678	0.065	0	HCAG_03933T0
	AF074	Gelsolin family	Q8MVU3	Der f 16	480	A	no	47	11959139	Bm1_33155	2e-45	31	LOAG_02669T0	5e-68	34	WUBG_01415T0	1e-31	41	Smp_008660.1	5e-35	31	psu|PF14_0422	0.43	0	Tc00.1047053504883.10	1.6	0	psu|LmjF36.4640	0.18	0	gb|TGME49_003600	6.8	0	ECCG_01934T0	0.63	0	gi|16803727	0.23	0	SAAG_00319T0	0.2	0	TBCT_01189.1	0.5	0	CAWT_05065	0.47	0	HCAG_02423T0
	AF074	Gelsolin family	Q5K4L5	Nic t Villin	559	P	NA			Bm1_10750	7e-18	24	LOAG_02669T0	2e-29	28	WUBG_07159T0	1e-18	23	Smp_008660.1	6e-16	24	psu|PFE1590w	0.028	0	Tc00.1047053506955.244	0.009	0	psu|LmjF35.0540	5e-06	0	gb|TGME49_114340	1e-05	0	ECCG_03539T0	0.34	0	gi|16804728	0.21	0	SAAG_02373T0	0.013	0	TBCT_00096.1	0.2	0	CAWT_00822	0.003	0	HCAG_02423T0
	AF075	SGNH-hydrolase family	Q7Y1X1	Hev b 13	391	P	yes	78	15024009	Bm1_15265	0.84	0	LOAG_07919T0	0.89	0	WUBG_03670T0	0.7	0	Smp_007570	16	0	psu|PF11_0275	2.2	0	Tc00.1047053510835.10	0.42	0	psu|LmjF28.1410	0.54	0	gb|TGME49_024870	5.3	0	ECCG_03669T0	0.5	0	gi|16804568	0.88	0	SAAG_01652T0	5.1	0	TBCT_02142.1	0.3	0	CAWT_03123	1.4	0	HCAG_03217T0
	AF075	SGNH-hydrolase family	Q6T4P0	Hev b 4	366	P	yes	89	11039838	Bm1_46375	2.9	0	LOAG_00362T0	3.1	0	WUBG_15169T0	0.65	0	Smp_113470	14	0	psu|PFI0005w	0.53	0	Tc00.1047053511121.11	0.85	0	psu|LmjF31.2760	12	0	gb|TGME49_080800	0.57	0	ECCG_01350T0	3.9	0	gi|16802704	0.63	0	SAAG_00206T0	1.6	0	TBCT_02813.1	4	0	CAWT_03172	0.12	0	HCAG_03217T0
	AF076	Glycoside hydrolase family 15	P69328	Asp n Glucoamylase	640	F	yes	62	9723670	Bm1_33690	8e-10	31	LOAG_08546T0	2e-09	35	WUBG_01530T0	6e-06	0	Smp_167190	0.0003	0	psu|PFD0080c	2e-08	28	Tc00.1047053508233.30	3e-07	35	psu|LmjF31.2670	2e-06	0	gb|TGME49_002110	4e-09	28	ECCG_03539T0	0.001	0	gi|16802178	0.003	0	SAAG_00476T0	4e-10	20	TBCT_00533.1	0.013	0	CAWT_02465	1e-62	31	HCAG_01581T0
	AF077	Glycoside hydrolase family 18	Q9U6R7	Der f 15	555	A	yes	70	IUIS	Bm1_17035	5e-42	31	LOAG_12924T0	3e-57	34	WUBG_13867T0	2e-42	33	Smp_162000	7e-07	58	psu|PFC0805w	6e-08	35	Tc00.1047053510939.25	6e-17	50	psu|LmjF12.0765	2e-17	56	gb|TGME49_002110	9e-20	61	ECCG_01019T0	4e-05	0	gi|16802153	6e-35	26	SAAG_00321T0	3e-11	34	TBCT_00533.1	3e-17	51	CAWT_03969	5e-32	26	HCAG_04323T0
	AF077	Glycoside hydrolase family 18	Q86R84	Der f 18	462	A	yes	54	12847483	Bm1_17035	2e-21	23	LOAG_12924T0	2e-31	26	WUBG_13867T0	5e-19	24	Smp_142510.1	0.21	0	psu|PFC0885c	0.41	0	Tc00.1047053511893.40	0.39	0	psu|LmjF16.1220	0.87	0	gb|TGME49_063750	8.5	0	ECCG_02756T0	1.4	0	gi|16802153	7e-16	21	SAAG_01409T0	2.8	0	TBCT_03620.1	0.48	0	CAWT_03969	2e-17	22	HCAG_04323T0
	AF077	Glycoside hydrolase family 18	Q4JK69	Der p 15	532	A	yes	70	16776685	Bm1_17035	9e-41	26	LOAG_12924T0	3e-56	34	WUBG_13867T0	2e-41	33	Smp_009300	0.0001	0	psu|PFD0080c	1e-05	0	Tc00.1047053504167.20	5e-10	52	psu|LmjF12.1070	2e-11	54	gb|TGME49_002110	6e-13	60	ECCG_01019T0	8e-05	0	gi|16802153	2e-34	27	SAAG_00321T0	5e-10	41	TBCT_00533.1	4e-10	54	CAWT_03969	7e-33	26	HCAG_04323T0
	AF077	Glycoside hydrolase family 18	Q4JK71	Der p 18	462	A	yes	63	16776685	Bm1_17035	2e-19	22	LOAG_12924T0	2e-30	26	WUBG_13867T0	4e-20	25	Smp_148450	0.16	0	psu|PFC0885c	0.037	0	Tc00.1047053503639.20	0.67	0	psu|LmjF16.1220	0.1	0	gb|TGME49_063750	6.5	0	ECCG_01155T0	2.3	0	gi|16802153	5e-16	20	SAAG_00536T0	2.1	0	TBCT_02565.1	2.4	0	CAWT_03969	1e-16	21	HCAG_04323T0
	AF077	Glycoside hydrolase family 18	Q2VST0	Ziz m 1	330	P	yes	87	16122801	Bm1_57495	1.5	0	LOAG_00513T0	1.6	0	WUBG_13273T0	3.7	0	Smp_146590.2	4.2	0	psu|PFE0485w	0.35	0	Tc00.1047053508231.40	2.2	0	psu|LmjF31.2570	2.8	0	gb|TGME49_013750	3.2	0	ECCG_03632T0	0.68	0	gi|16803792	0.19	0	SAAG_01107T0	0.83	0	TBCT_02542.1	2.7	0	CAWT_02272	5e-30	30	HCAG_07263T0
	AF078	Chitin-binding peritrophin-A domain	Q17282	Blo t 12	144	A	no	50	8939156	Bm1_46665	0.08	0	LOAG_05611T0	0.002	0	WUBG_15929T0	0.019	0	Smp_154900	0.24	0	psu|MAL7P1.171	0.002	0	Tc00.1047053504031.40	0.028	0	psu|LmjF36.5590	0.32	0	gb|TGME49_025200	0.12	0	ECCG_00309T0	0.15	0	gi|16803145	0.63	0	SAAG_00461T0	0.085	0	TBCT_01011.1	1.8	0	CAWT_05437	0.027	0	HCAG_01361T0
	AF079	Glycoside hydrolase family 16	B0XNL0	Asp f 9	395	F	no	31	9482698	Bm1_50600	3e-07	31	LOAG_15063T0	1e-09	43	WUBG_01924T0	2e-06	0	Smp_161620	3e-06	0	psu|PFD0080c	5e-08	31	Tc00.1047053507979.30	2e-08	33	psu|LmjF35.0520	9e-15	32	gb|TGME49_025090	3e-14	39	ECCG_03539T0	4e-07	27	gi|16802178	1e-07	24	SAAG_00476T0	7e-10	29	TBCT_02285.1	2e-05	0	CAWT_03508	1e-81	41	HCAG_02549T0
	AF080	Glycoside hydrolase family 20	Q02352	Pen ch 20	117	F	yes	100	7600381	Bm1_15330	3e-06	0	LOAG_09152T0	3e-06	0	WUBG_01807T0	2e-06	0	Smp_053900	2e-06	0	psu|MAL7P1.150	5.2	0	Tc00.1047053508461.540	2.6	0	psu|LmjF36.0800	0.12	0	gb|TGME49_113540	4.2	0	ECCG_03298T0	2.4	0	gi|16802360	0.42	0	SAAG_01688T0	1.1	0	TBCT_00197.1	0.31	0	CAWT_04734	4e-40	62	HCAG_05925T0
	AF081	GMC oxidoreductase	Q5GMY3	mala s 12	618	F	yes	62	17313403	Bm1_39805	8e-42	34	LOAG_03547T0	6e-40	33	WUBG_07791T0	2e-40	33	Smp_094500	2e-59	31	psu|PF14_0192	0.15	0	Tc00.1047053511589.170	7e-12	22	psu|LmjF36.3230	5e-10	19	gb|TGME49_113950	2e-39	31	ECCG_03264T0	2e-62	30	gi|16803411	0.0007	0	SAAG_00431T0	3e-67	34	TBCT_01260.1	1e-57	30	CAWT_02023	7e-06	0	HCAG_01883T0
	AF082	Glyoxalase superfamily	Q948T6	Ory s Glyoxalase I	291	P	NA			Bm1_18670	7e-12	30	LOAG_10318T0	1e-15	23	WUBG_04644T0	5e-14	25	Smp_001410.2	1e-14	30	psu|PF11_0145	7e-09	22	Tc00.1047053510659.240	6e-26	47	psu|LmjF35.3010	6e-28	50	gb|TGME49_048400	1e-19	27	ECCG_00173T0	1e-35	54	gi|16804207	5e-16	36	SAAG_00342T0	0.049	0	TBCT_00541.1	0.008	0	CAWT_01323	6e-19	27	HCAG_09022T0
	AF083	Glycoside hydrolase family 3	O00089	Asp n 14	804	F	no	11	9723670	Bm1_41765	0.1	0	LOAG_03557T0	0.022	0	WUBG_02060T0	0.19	0	Smp_043390	1e-28	23	psu|MAL13P1.260	2.3	0	Tc00.1047053511365.10	2.9	0	psu|LmjF20.0520	0.75	0	gb|TGME49_023930	1.5	0	ECCG_00631T0	3e-45	25	gi|16803769	3e-43	26	SAAG_01566T0	1.8	0	TBCT_00184.1	6e-32	26	CAWT_02513	1e-20	25	HCAG_00193T0
	AF084	Barwin family	P81729	Bra r 2	91	P	yes	82	10400861	Bm1_40760	0.8	0	LOAG_03154T0	0.049	0	WUBG_00016T0	1.8	0	Smp_132900	1.4	0	psu|PF08_0013	2.3	0	Tc00.1047053504149.90	2.4	0	psu|LmjF36.6290	0.27	0	gb|TGME49_118310	1.5	0	ECCG_00091T0	3.1	0	gi|16802343	2.4	0	SAAG_00926T0	2.1	0	TBCT_02731.1	0.48	0	CAWT_02505	0.065	0	HCAG_04323T0
	AF085	Kappa-casein	P02668	Bos d 8 kappa	190	A	no	31	18307527	Bm1_30510	0.1	0	LOAG_04430T0	0.084	0	WUBG_01482T0	0.34	0	Smp_156170	0.45	0	psu|PF11_0168	2.2	0	Tc00.1047053510371.110	0.029	0	psu|LmjF12.0765	0.006	0	gb|TGME49_088420	0.37	0	ECCG_01499T0	0.92	0	gi|16804580	0.34	0	SAAG_00319T0	0.23	0	TBCT_00533.1	0.039	0	CAWT_02674	0.077	0	HCAG_02404T0
	AF085	Kappa-casein	P02670	Cap h Casein kappa	192	A	NA			Bm1_29785	0.002	0	LOAG_06935T0	0.11	0	WUBG_17259T0	1.3	0	Smp_175920	0.12	0	psu|PFE0070w	0.46	0	Tc00.1047053506409.140	0.065	0	psu|LmjF04.0830	0.066	0	gb|TGME49_059840	0.057	0	ECCG_04553T0	1.6	0	gi|16804580	0.26	0	SAAG_02373T0	0.4	0	TBCT_03040.1	0.44	0	CAWT_03949	0.021	0	HCAG_01361T0
	AF086	Staphylococcal/streptococcal toxin	P0A0L2	Sta a SEA	257	B	yes	56	9396971	Bm1_25800	1.4	0	LOAG_01152T0	0.23	0	WUBG_18837T0	0.54	0	Smp_135110	6.5	0	psu|PF14_0690	0.0003	0	Tc00.1047053507677.150	0.4	0	psu|LmjF09.0120	5.8	0	gb|TGME49_062620	3.9	0	ECCG_04284T0	1.9	0	gi|16802969	0.4	0	SAAG_01727T0	1e-47	37	TBCT_02214.1	9.6	0	CAWT_01843	0.21	0	HCAG_06026T0
	AF086	Staphylococcal/streptococcal toxin	P01552	Sta a SEB	266	B	yes	63	9396971	Bm1_46305	0.86	0	LOAG_04870T0	0.41	0	WUBG_03205T0	0.039	0	Smp_149530	0.36	0	psu|PF14_0213	6e-06	0	Tc00.1047053509253.20	3.5	0	psu|LmjF15.1360	3.6	0	gb|TGME49_042070	1.1	0	ECCG_00970T0	0.39	0	gi|16802967	0.11	0	SAAG_01728T0	2e-81	54	TBCT_00092.1	5.9	0	CAWT_02434	0.034	0	HCAG_05152T0
	AF086	Staphylococcal/streptococcal toxin	P01553	Sta a SEC	266	B	no	31	18621391	Bm1_50860	0.059	0	LOAG_02027T0	0.54	0	WUBG_18837T0	0.19	0	Smp_144130	4	0	psu|PFD0200c	1e-05	0	Tc00.1047053511129.60	0.065	0	psu|LmjF23.1065	3.6	0	gb|TGME49_017680	0.82	0	ECCG_03759T0	0.23	0	gi|16803123	0.25	0	SAAG_01728T0	3e-80	52	TBCT_00192.1	17	0	CAWT_02528	0.009	0	HCAG_06864T0
	AF086	Staphylococcal/streptococcal toxin	P20723	Sta a SED	258	B	no	25	18621391	Bm1_31030	0.37	0	LOAG_00408T0	0.061	0	WUBG_19251T0	0.31	0	Smp_141600	2.3	0	psu|PF07_0101	0.0005	0	Tc00.1047053504153.30	2.6	0	psu|LmjF23.0550	0.028	0	gb|TGME49_074070	0.27	0	ECCG_02392T0	0.85	0	gi|16802200	0.23	0	SAAG_01731T0	6e-43	39	TBCT_03061.1	4.3	0	CAWT_04627	0.094	0	HCAG_01296T0
	AF086	Staphylococcal/streptococcal toxin	P12993	Sta a SEE	257	B	NA			Bm1_30140	1.1	0	LOAG_02752T0	0.87	0	WUBG_02164T0	0.7	0	Smp_104450	6.5	0	psu|PF14_0470	0.017	0	Tc00.1047053507677.150	0.23	0	psu|LmjF24.1070	4.4	0	gb|TGME49_021920	0.6	0	ECCG_02127T0	0.49	0	gi|16804644	0.08	0	SAAG_01727T0	7e-47	37	TBCT_02413.1	7.3	0	CAWT_03635	0.001	0	HCAG_03460T0
	AF086	Staphylococcal/streptococcal toxin	P06886	Sta a TSST	234	B	no	41	9396971	Bm1_55125	2.1	0	LOAG_04555T0	0.12	0	WUBG_03565T0	3	0	Smp_172580	0.86	0	psu|PF07_0082	0.002	0	Tc00.1047053508741.210	1	0	psu|LmjF22.0750	0.59	0	gb|TGME49_073790	4.4	0	ECCG_01777T0	0.33	0	gi|16804124	0.092	0	SAAG_00893T0	1e-11	26	TBCT_00924.1	0.008	0	CAWT_05858	0.69	0	HCAG_06313T0
	AF087	Ole e 1-related protein	Q8LGR0	Che a 1	168	P	yes	77	11893853	Bm1_37935	0.11	0	LOAG_02163T0	0.018	0	WUBG_11344T0	0.12	0	Smp_150770	8.5	0	psu|PFL1865w	5.2	0	Tc00.1047053508971.50	0.56	0	psu|LmjF06.0200	2.2	0	gb|TGME49_068790	0.13	0	ECCG_01921T0	0.57	0	gi|16803094	0.28	0	SAAG_00671T0	2.7	0	TBCT_01928.1	2.3	0	CAWT_06071	0.062	0	HCAG_02227T0
	AF087	Ole e 1-related protein	Q29W25	Cro s 1	168	P	NA			Bm1_06695	2	0	LOAG_02163T0	0.068	0	WUBG_06707T0	1.8	0	Smp_150770	15	0	psu|PFL1865w	5.2	0	Tc00.1047053508461.100	0.25	0	psu|LmjF06.0200	2.2	0	gb|TGME49_068790	0.1	0	ECCG_01921T0	0.57	0	gi|16803094	0.63	0	SAAG_00468T0	0.72	0	TBCT_01928.1	2.3	0	CAWT_06071	0.18	0	HCAG_04174T0
	AF087	Ole e 1-related protein	Q6U740	Fra e 1	146	P	yes	75	15696094	Bm1_36565	0.54	0	LOAG_15507T0	2.9	0	WUBG_12985T0	0.36	0	Smp_134120	23	0	psu|PFE0235c	6.7	0	Tc00.1047053506303.60	0.54	0	psu|LmjF22.1240	0.97	0	gb|TGME49_088240	5.4	0	ECCG_03272T0	15	0	gi|16803804	0.64	0	SAAG_01313T0	0.15	0	TBCT_03418.1	1.8	0	CAWT_01799	2.6	0	HCAG_09313T0
	AF087	Ole e 1-related protein	O82015	Lig v 1	145	P	NA			Bm1_38655	0.9	0	LOAG_09816T0	1.3	0	WUBG_12985T0	6.7	0	Smp_057210	13	0	psu|PFI1470c	1	0	Tc00.1047053510933.10	0.14	0	psu|LmjF22.1240	0.73	0	gb|TGME49_003060	0.82	0	ECCG_02632T0	0.99	0	gi|16803443	1.4	0	SAAG_01185T0	1.6	0	TBCT_00118.1	6.8	0	CAWT_01799	1.5	0	HCAG_09628T0
	AF087	Ole e 1-related protein	Q7M1X5	Lol p 11	134	P	yes	65	7751518	Bm1_09595	0.26	0	LOAG_11478T0	0.37	0	WUBG_01346T0	0.23	0	Smp_041740	0.74	0	psu|PFI1005w	0.66	0	Tc00.1047053504239.380	2.2	0	psu|LmjF23.1220	0.61	0	gb|TGME49_082130	0.11	0	ECCG_03323T0	0.22	0	gi|16803255	0.24	0	SAAG_00293T0	7	0	TBCT_00002.1	4.5	0	CAWT_04878	0.58	0	HCAG_06628T0
	AF087	Ole e 1-related protein	P19963	Ole e 1	145	P	yes	92	20128435	Bm1_36565	1.2	0	LOAG_04938T0	1.7	0	WUBG_12985T0	1	0	Smp_134120	10	0	psu|PFI1470c	5	0	Tc00.1047053510933.10	2	0	psu|LmjF24.1070	1.2	0	gb|TGME49_064660	2.4	0	ECCG_01049T0	3.8	0	gi|16803804	1.1	0	SAAG_01461T0	0.56	0	TBCT_03418.1	1	0	CAWT_01799	3.4	0	HCAG_01305T0
	AF087	Ole e 1-related protein	Q8H6L7	Phl p 11	143	P	no	43	12534548	Bm1_09595	2.5	0	LOAG_11478T0	3.6	0	WUBG_04728T0	2.2	0	Smp_101750	4.4	0	psu|PFB0795w	2.9	0	Tc00.1047053504147.40	1.5	0	psu|LmjF26.0340	1.2	0	gb|TGME49_082130	0.47	0	ECCG_01514T0	2.1	0	gi|16803255	0.48	0	SAAG_01658T0	3.5	0	TBCT_03225.1	1	0	CAWT_00934	1.1	0	HCAG_06628T0
	AF087	Ole e 1-related protein	P82242	Pla l 1	131	P	yes	86	11251634	Bm1_32810	0.066	0	LOAG_02786T0	0.27	0	WUBG_02405T0	0.17	0	Smp_043010	0.91	0	psu|PFL0310c	1.1	0	Tc00.1047053504153.170	0.19	0	psu|LmjF14.0930	6.5	0	gb|TGME49_028060	0.13	0	ECCG_02989T0	0.48	0	gi|16803809	0.69	0	SAAG_01658T0	1.4	0	TBCT_03534.1	1.9	0	CAWT_06044	1.6	0	HCAG_08138T0
	AF088	Casein kinase 2 regulatory subunit	P67869	Gal d Phosvitin	215	A	NA		3170012	Bm1_48865	1e-106	85	LOAG_02447T0	1e-106	85	WUBG_02657T0	1e-106	85	Smp_025010.1	1e-103	79	psu|PF13_0232	3e-42	41	Tc00.1047053503757.40	9e-57	51	psu|LmjF36.5090	3e-57	53	gb|TGME49_068810	1e-49	46	ECCG_01830T0	1.1	0	gi|16803075	0.69	0	SAAG_00016T0	0.12	0	TBCT_03821.1	2	0	CAWT_04659	6e-57	52	HCAG_03345T0
	AF089	Lipid-binding serum glycoprotein	P82615	Equ c 4	228	A	NA			Bm1_15645	0.69	0	LOAG_03290T0	0.43	0	WUBG_01768T0	1	0	Smp_152680	4.1	0	psu|PFI0240c	0.79	0	Tc00.1047053509767.110	0.19	0	psu|LmjF33.2190	0.43	0	gb|TGME49_051730	3.2	0	ECCG_01193T0	2.1	0	gi|16804876	0.26	0	SAAG_01759T0	0.06	0	TBCT_01638.1	0.74	0	CAWT_00812	0.23	0	HCAG_01774T0
	AF090	Oleosin	Q84T91	Cor a 13	140	P	yes	63	IUIS	Bm1_03730	1.4	0	LOAG_07478T0	0.11	0	WUBG_14388T0	0.15	0	Smp_165670	1.1	0	psu|PFI1295c	1.2	0	Tc00.1047053507631.20	0.5	0	psu|LmjF33.1800	0.4	0	gb|TGME49_091150	2.9	0	ECCG_01155T0	0.25	0	gi|16804501	0.07	0	SAAG_02132T0	0.31	0	TBCT_00203.1	0.067	0	CAWT_03592	0.29	0	HCAG_07498T0
	AF091	Diphtheria toxin	Q5PY51	Cor d Toxoid	536	B	NA			Bm1_22025	0.94	0	LOAG_05006T0	0.99	0	WUBG_07248T0	1.7	0	Smp_018240.2	14	0	psu|PF11_0211	0.38	0	Tc00.1047053504147.150	1	0	psu|LmjF28.1760	0.27	0	gb|TGME49_064120	0.54	0	ECCG_00972T0	1.2	0	gi|16803730	1.3	0	SAAG_02100T0	0.1	0	TBCT_02534.1	0.15	0	CAWT_05303	0.11	0	HCAG_02128T0
	AF092	Lipoprotein	Q8N0N0	Der p 14	1662	A	no	2	19021722	Bm1_21915	0.02	0	LOAG_04890T0	3e-20	18	WUBG_10941T0	0.1	0	Smp_059170.2	0.3	0	psu|PFE1095w	1e-08	22	Tc00.1047053510039.60	2.2	0	psu|LmjF27.0270	0.96	0	gb|TGME49_094400	1.1	0	ECCG_02604T0	1.1	0	gi|16804542	0.66	0	SAAG_00562T0	0.011	0	TBCT_00649.1	5.5	0	CAWT_02582	0.0002	0	HCAG_04952T0
	AF093	Expansin, C-terminal domain	Q947S4	Cyn d 1	262	P	yes	60	18925892	Bm1_22885	5.4	0	LOAG_02783T0	0.9	0	WUBG_13288T0	2.1	0	Smp_084090	33	0	psu|PF11_0362	1.6	0	Tc00.1047053507711.150	3.5	0	psu|LmjF29.0240	0.7	0	gb|TGME49_072550	1.4	0	ECCG_02740T0	0.23	0	gi|16803768	3.5	0	SAAG_00627T0	3.1	0	TBCT_01205.1	1.2	0	CAWT_05237	0.82	0	HCAG_04194T0
	AF093	Expansin, C-terminal domain	Q7XYF2	Cyn d 15	112	P	NA			Bm1_38245	1.1	0	LOAG_03847T0	1.2	0	WUBG_08552T0	0.37	0	Smp_156150	2.4	0	psu|PFE0040c	0.065	0	Tc00.1047053509843.20	0.85	0	psu|LmjF36.0440	1.5	0	gb|TGME49_017330	0.33	0	ECCG_01190T0	2.9	0	gi|16803625	0.29	0	SAAG_02439T0	0.77	0	TBCT_01860.1	0.094	0	CAWT_05647	0.17	0	HCAG_06416T0
	AF093	Expansin, C-terminal domain	Q7XAX8	Dac g 1	240	P	yes	95	2414230	Bm1_16850	0.19	0	LOAG_03252T0	0.12	0	WUBG_13288T0	0.097	0	Smp_084090	10	0	psu|PFE0055c	0.5	0	Tc00.1047053485889.10	1.4	0	psu|LmjF19.0270	1.1	0	gb|TGME49_059410	0.92	0	ECCG_02011T0	2.2	0	gi|16804434	0.21	0	SAAG_01260T0	6.1	0	TBCT_00191.1	3.9	0	CAWT_00152	2.1	0	HCAG_02002T0
	AF093	Expansin, C-terminal domain	P93124	Dac g 3	96	P	yes	60	8811075	Bm1_43835	0.27	0	LOAG_01560T0	3.5	0	WUBG_10244T0	0.83	0	Smp_007570	9	0	psu|PFB0915w	1.3	0	Tc00.1047053510173.60	1.4	0	psu|LmjF04.1220	0.6	0	gb|TGME49_105030	0.86	0	ECCG_03247T0	0.16	0	gi|16804087	0.074	0	SAAG_02435T0	1.3	0	TBCT_01190.1	1.1	0	CAWT_01983	0.71	0	HCAG_08550T0
	AF093	Expansin, C-terminal domain	P14947	Lol p 2	97	P	NA			Bm1_08220	0.16	0	LOAG_09269T0	3.5	0	WUBG_10510T0	0.13	0	Smp_057430	12	0	psu|PF14_0226	1	0	Tc00.1047053509393.40	4.2	0	psu|LmjF03.0200	3.9	0	gb|TGME49_121410	0.86	0	ECCG_01333T0	0.21	0	gi|16802716	0.29	0	SAAG_01160T0	0.11	0	TBCT_00656.1	2.3	0	CAWT_01046	0.54	0	HCAG_05817T0
	AF093	Expansin, C-terminal domain	P14948	Lol p 3	97	P	yes	26	2496037	Bm1_43835	0.78	0	LOAG_09271T0	4.6	0	WUBG_07036T0	1.8	0	Smp_149960	34	0	psu|PF07_0121	1.7	0	Tc00.1047053504045.120	0.22	0	psu|LmjF04.1220	1.3	0	gb|TGME49_114360	0.17	0	ECCG_00719T0	0.093	0	gi|16804087	0.076	0	SAAG_02184T0	0.19	0	TBCT_01329.1	5.2	0	CAWT_01983	0.42	0	HCAG_08180T0
	AF093	Expansin, C-terminal domain	Q40638	Ory s 1	267	P	NA			Bm1_53265	0.39	0	LOAG_04578T0	0.41	0	WUBG_02198T0	0.33	0	Smp_084090	15	0	psu|PF14_0442	0.069	0	Tc00.1047053510725.90	2.1	0	psu|LmjF34.1360	2.1	0	gb|TGME49_017790	1.1	0	ECCG_00277T0	3.3	0	gi|16804682	2.7	0	SAAG_00631T0	7	0	TBCT_00806.1	0.11	0	CAWT_00571	0.49	0	HCAG_11443T0
	AF093	Expansin, C-terminal domain	P43213	Phl p 1	263	P	yes	84	18339006	Bm1_16850	0.17	0	LOAG_03252T0	0.14	0	WUBG_13288T0	0.93	0	Smp_084090	11	0	psu|PFF0165c	1.3	0	Tc00.1047053509489.20	0.41	0	psu|LmjF33.2290	2.1	0	gb|TGME49_030000	2.3	0	ECCG_00599T0	3.3	0	gi|16804434	0.24	0	SAAG_01576T0	2.4	0	TBCT_00806.1	1.2	0	CAWT_04440	1.8	0	HCAG_10822T0
	AF093	Expansin, C-terminal domain	P43214	Phl p 2	122	P	yes	82	18339006	Bm1_55955	1.8	0	LOAG_04349T0	0.67	0	WUBG_16332T0	4.7	0	Smp_152570	34	0	psu|PF14_0481	7.6	0	Tc00.1047053508347.70	0.36	0	psu|LmjF36.3630	1.4	0	gb|TGME49_104630	0.01	0	ECCG_00134T0	1.2	0	gi|16803768	1.3	0	SAAG_01160T0	0.083	0	TBCT_03046.1	0.11	0	CAWT_05655	1.4	0	HCAG_02081T0
	AF093	Expansin, C-terminal domain	Q69B42	Phl p 3	97	P	yes	57	16776686	Bm1_43835	3	0	LOAG_06183T0	4.6	0	WUBG_05340T0	0.097	0	Smp_128330	15	0	psu|PFB0915w	2.3	0	Tc00.1047053510885.40	1.4	0	psu|LmjF04.1220	0.21	0	gb|TGME49_114360	0.66	0	ECCG_03247T0	0.27	0	gi|16804087	0.058	0	SAAG_02028T0	0.43	0	TBCT_01735.1	0.36	0	CAWT_05036	2.7	0	HCAG_09019T0
	AF093	Expansin, C-terminal domain	Q9ZP03	Poa p 1	263	P	NA			Bm1_16850	0.1	0	LOAG_03252T0	0.14	0	WUBG_13288T0	0.55	0	Smp_084090	3.9	0	psu|PF11_0162	0.57	0	Tc00.1047053508221.790	0.41	0	psu|LmjF29.1390	0.92	0	gb|TGME49_111700	0.62	0	ECCG_00203T0	2.5	0	gi|16804434	0.24	0	SAAG_01666T0	6.9	0	TBCT_00806.1	1.2	0	CAWT_00152	1.8	0	HCAG_07995T0
	AF093	Expansin, C-terminal domain	Q9ZR84	Tri a 1	271	P	NA			Bm1_42470	2	0	LOAG_00212T0	2.7	0	WUBG_03973T0	2.2	0	Smp_078930	9.2	0	psu|PF08_0141	1.3	0	Tc00.1047053510715.64	0.33	0	psu|LmjF19.0270	2.8	0	gb|TGME49_011850	0.099	0	ECCG_04287T0	0.9	0	gi|16804373	14	0	SAAG_00627T0	0.85	0	TBCT_03686.1	0.55	0	CAWT_00152	1.1	0	HCAG_04323T0
	AF093	Expansin, C-terminal domain	Q712N2	Tri a 2	122	P	NA			Bm1_55955	1.8	0	LOAG_04349T0	0.67	0	WUBG_16332T0	4.7	0	Smp_152570	34	0	psu|PF14_0481	7.6	0	Tc00.1047053508347.70	0.36	0	psu|LmjF36.3630	1.4	0	gb|TGME49_104630	0.01	0	ECCG_00134T0	1.2	0	gi|16803768	1.3	0	SAAG_01160T0	0.083	0	TBCT_03046.1	0.11	0	CAWT_05655	1.4	0	HCAG_02081T0
	AF093	Expansin, C-terminal domain	P58738	Zea m 1	269	P	NA			Bm1_42965	1.1	0	LOAG_03999T0	1.2	0	WUBG_14276T0	0.97	0	Smp_064010	0.17	0	psu|PF08_0141	0.35	0	Tc00.1047053503975.100	0.15	0	psu|LmjF19.1170	0.15	0	gb|TGME49_061750	0.83	0	ECCG_03968T0	0.68	0	gi|16803891	2.1	0	SAAG_01715T0	3.2	0	TBCT_00125.1	0.32	0	CAWT_02533	2.5	0	HCAG_11510T0
	AF093	Expansin, C-terminal domain	Q7XBA3	Zea m 3	120	P	NA			Bm1_53560	2.2	0	LOAG_10973T0	0.098	0	WUBG_02389T0	2.6	0	Smp_041460	0.17	0	psu|MAL8P1.127	13	0	Tc00.1047053506529.541	8.3	0	psu|LmjF28.2010	1	0	gb|TGME49_013900	3.4	0	ECCG_02460T0	0.68	0	gi|16802784	0.58	0	SAAG_00603T0	2	0	TBCT_02001.1	0.14	0	CAWT_04609	1.7	0	HCAG_08357T0
	AF094	Expansin, N-terminal domain	P43216	Hol l 1	265	P	yes	67	8768803	Bm1_16850	0.29	0	LOAG_03252T0	0.24	0	WUBG_13288T0	0.11	0	Smp_084090	3	0	psu|PFF0165c	2.9	0	Tc00.1047053511599.80	2.1	0	psu|LmjF29.1390	4.6	0	gb|TGME49_030000	0.37	0	ECCG_02989T0	1.1	0	gi|16804434	0.32	0	SAAG_02075T0	6.9	0	TBCT_00099.1	2	0	CAWT_00492	4.1	0	HCAG_02002T0
	AF094	Expansin, N-terminal domain	P14946	Lol p 1	263	P	yes	87	9395340	Bm1_16850	0.17	0	LOAG_10520T0	0.18	0	WUBG_13288T0	0.11	0	Smp_084090	20	0	psu|PFL1960w	1.3	0	Tc00.1047053506223.100	2.7	0	psu|LmjF19.0270	0.54	0	gb|TGME49_030000	0.62	0	ECCG_00502T0	0.87	0	gi|16804434	0.008	0	SAAG_00698T0	4	0	TBCT_00099.1	2	0	CAWT_00152	1.8	0	HCAG_10822T0
	AF094	Expansin, N-terminal domain	B8PYF3	Pas n 1	265	P	yes	85	18817975	Bm1_16850	0.5	0	LOAG_08438T0	0.41	0	WUBG_08806T0	0.72	0	Smp_016180.1	2.3	0	psu|PF11_0432	0.2	0	Tc00.1047053506459.130	3.5	0	psu|LmjF19.1170	0.42	0	gb|TGME49_012860	0.62	0	ECCG_02336T0	1.9	0	gi|16802921	6	0	SAAG_02346T0	0.37	0	TBCT_00125.1	0.91	0	CAWT_01281	0.13	0	HCAG_02842T0
	AF094	Expansin, N-terminal domain	Q41260	Pha a 1	269	P	yes	77	7687099	Bm1_16850	0.23	0	LOAG_11353T0	1.6	0	WUBG_13288T0	0.43	0	Smp_089180	7	0	psu|PFF0165c	1.7	0	Tc00.1047053511599.40	4.7	0	psu|LmjF26.0400	0.56	0	gb|TGME49_030000	0.63	0	ECCG_02989T0	3.4	0	gi|16803628	0.33	0	SAAG_02075T0	9.3	0	TBCT_02883.1	2.7	0	CAWT_00152	2.5	0	HCAG_02002T0
	AF095	Melittin	P01501	Api m 4	70	A	no	0	12403934	Bm1_47795	0.27	0	LOAG_11288T0	0.54	0	WUBG_10189T0	1.4	0	Smp_123110	8.9	0	psu|PF14_0040	0.35	0	Tc00.1047053506955.99	0.64	0	psu|LmjF14.1440	0.46	0	gb|TGME49_068960	0.17	0	ECCG_03766T0	0.074	0	gi|16802731	0.84	0	SAAG_00452T0	0.01	0	TBCT_03726.1	0.22	0	CAWT_00644	0.18	0	HCAG_07401T0
	AF096	Beta-amylase	O23978	Hor v 17	505	P	NA			Bm1_45225	4.3	0	LOAG_03961T0	1.6	0	WUBG_17681T0	1.2	0	Smp_141350	0.51	0	psu|PF14_0748	2.3	0	Tc00.1047053506297.20	11	0	psu|LmjF24.1150	3.7	0	gb|TGME49_024690	1.5	0	ECCG_02884T0	2	0	gi|16802135	0.92	0	SAAG_01748T0	0.62	0	TBCT_03749.1	2.6	0	CAWT_00062	1.5	0	HCAG_06362T0
	AF097	Collagen	P02465	Bos d alpha2I	1364	A	NA		12373276	Bm1_16850	0	46	LOAG_03919T0	0	44	WUBG_11834T0	1e-148	44	Smp_164590	0	41	psu|PFL1960w	7e-08	36	Tc00.1047053503975.100	4e-38	29	psu|LmjF35.0290	2e-23	24	gb|TGME49_035420	2e-50	26	ECCG_01745T0	3e-30	46	gi|16803072	0.083	0	SAAG_02532T0	0.16	0	TBCT_01758.1	4e-52	35	CAWT_02955	4e-10	25	HCAG_03222T0
	AF098	Pheromone and odorant binding protein	P18153	Aed a 2	321	A	no	11	11307029	Bm1_09030	0.034	0	LOAG_02079T0	0.31	0	WUBG_01287T0	0.19	0	Smp_176810	5.3	0	psu|PFL1130c	0.014	0	Tc00.1047053507485.70	4.6	0	psu|LmjF30.1560	2.1	0	gb|TGME49_069160	0.82	0	ECCG_02931T0	2.5	0	gi|16802485	0.91	0	SAAG_00832T0	0.072	0	TBCT_03204.1	7.5	0	CAWT_01519	0.63	0	HCAG_01923T0
	AF099	Berberine bridge enzyme	Q5QJ60	Cyn d 4	522	P	NA			Bm1_07035	0.18	0	LOAG_04268T0	0.018	0	WUBG_17535T0	1.7	0	Smp_123320	17	0	psu|PFD0950w	5.3	0	Tc00.1047053504151.60	0.092	0	psu|LmjF29.0280	2e-06	0	gb|TGME49_000440	2.6	0	ECCG_02351T0	0.002	0	gi|16804038	0.19	0	SAAG_01874T0	3.2	0	TBCT_01730.1	3e-15	31	CAWT_04065	0.0001	0	HCAG_03347T0
	AF099	Berberine bridge enzyme	Q5TIW4	Hor v 4	518	P	NA			Bm1_34710	0.53	0	LOAG_04268T0	0.43	0	WUBG_05741T0	0.44	0	Smp_176340	38	0	psu|PFL1635w	6.9	0	Tc00.1047053504151.60	0.0006	0	psu|LmjF29.0280	4e-05	0	gb|TGME49_023390	0.18	0	ECCG_02351T0	5e-07	23	gi|16802334	0.32	0	SAAG_01580T0	1.8	0	TBCT_01730.1	9e-15	27	CAWT_03045	9e-06	0	HCAG_03347T0
	AF099	Berberine bridge enzyme	Q5TIW3	Lol p 4	423	P	yes	75	6865958	Bm1_34710	0.24	0	LOAG_02950T0	1.3	0	WUBG_05741T0	0.2	0	Smp_160220.1	13	0	psu|PFL1635w	0.48	0	Tc00.1047053504151.60	0.008	0	psu|LmjF29.0280	0.002	0	gb|TGME49_003000	5.8	0	ECCG_02351T0	0.0005	0	gi|16804837	1.3	0	SAAG_02549T0	0.86	0	TBCT_01730.1	4e-14	31	CAWT_03045	0.016	0	HCAG_01359T0
	AF099	Berberine bridge enzyme	Q2I6V7	Phl p 4	525	P	yes	85	18339006	Bm1_34710	0.41	0	LOAG_04268T0	1.3	0	WUBG_05741T0	0.2	0	Smp_171300	10	0	psu|PFL1635w	0.22	0	Tc00.1047053504151.60	0.071	0	psu|LmjF29.0280	0.0006	0	gb|TGME49_090600	1.5	0	ECCG_02351T0	0.0002	0	gi|16803902	0.96	0	SAAG_02549T0	0.38	0	TBCT_01730.1	9e-15	28	CAWT_04065	0.0001	0	HCAG_01359T0
	AF099	Berberine bridge enzyme	Q5TIW7	Sec c 4	520	P	NA			Bm1_34710	0.082	0	LOAG_11696T0	0.43	0	WUBG_05741T0	0.068	0	Smp_152810	29	0	psu|MAL7P1.50	6.9	0	Tc00.1047053504151.60	0.0004	0	psu|LmjF29.0280	1e-07	24	gb|TGME49_068330	1.5	0	ECCG_02351T0	1e-06	0	gi|16804813	0.73	0	SAAG_01634T0	1.1	0	TBCT_01730.1	5e-16	31	CAWT_04065	1e-05	0	HCAG_03347T0
	AF099	Berberine bridge enzyme	Q5TIW6	Tri a 4	518	P	NA			Bm1_34710	0.41	0	LOAG_04268T0	0.039	0	WUBG_05741T0	0.26	0	Smp_163470	22	0	psu|PFL1635w	0.81	0	Tc00.1047053504151.60	0.002	0	psu|LmjF29.0280	6e-06	0	gb|TGME49_023390	0.047	0	ECCG_02351T0	2e-07	24	gi|16802334	0.19	0	SAAG_01634T0	0.37	0	TBCT_01730.1	1e-13	27	CAWT_03045	8e-05	0	HCAG_03347T0
	AF100	Myosin tail	Q9NJA9	Ani s 2	869	A	yes	88	11060483	Bm1_04450	0	91	LOAG_05509T0	0	88	WUBG_04957T0	1e-179	40	Smp_085540.3	1e-174	38	psu|PF10_0356	8e-39	25	Tc00.1047053511823.14	8e-49	23	psu|LmjF34.0690	3e-56	25	gb|TGME49_090620	2e-34	20	ECCG_03346T0	1e-13	20	gi|16803844	7e-21	20	SAAG_01832T0	2e-18	18	TBCT_02860.1	2e-12	22	CAWT_03286	6e-37	19	HCAG_09536T0
	AF100	Myosin tail	Q8MUF6	Blo t 11	875	A	yes	52	11815735	Bm1_04450	1e-177	50	LOAG_05509T0	0	50	WUBG_04957T0	1e-162	38	Smp_085540.3	1e-173	39	psu|PF10_0356	1e-34	22	Tc00.1047053511823.14	7e-48	23	psu|LmjF34.0690	2e-50	24	gb|TGME49_048570	3e-35	22	ECCG_03346T0	3e-15	19	gi|16803844	1e-16	20	SAAG_01832T0	8e-18	20	TBCT_02860.1	1e-07	19	CAWT_03286	7e-46	21	HCAG_09536T0
	AF100	Myosin tail	Q967Z0	Der f 11	692	A	yes	82	9723675	Bm1_04450	1e-171	51	LOAG_05509T0	0	51	WUBG_04957T0	1e-138	38	Smp_085540.3	1e-142	39	psu|PF10_0356	3e-29	23	Tc00.1047053511823.14	3e-44	23	psu|LmjF34.0690	5e-43	24	gb|TGME49_090620	1e-30	22	ECCG_03346T0	2e-15	21	gi|16803685	7e-18	21	SAAG_01832T0	3e-14	19	TBCT_02860.1	6e-08	18	CAWT_03286	6e-34	21	HCAG_09536T0
	AF100	Myosin tail	Q6Y2F9	Der p 11	875	A	no	50	15005727	Bm1_04450	1e-178	50	LOAG_05509T0	0	50	WUBG_04957T0	1e-167	38	Smp_085540.3	1e-175	39	psu|PF10_0356	2e-37	24	Tc00.1047053511823.14	3e-48	22	psu|LmjF34.0690	3e-50	23	gb|TGME49_048570	4e-37	22	ECCG_03346T0	3e-18	21	gi|16803844	6e-17	20	SAAG_01832T0	7e-16	18	TBCT_02860.1	2e-07	18	CAWT_03286	7e-46	21	HCAG_09536T0
	AF102	Group 5/6 grass pollen allergen	Q93WP9	Dac g 5	290	P	yes	80	2210876	Bm1_04240	6e-05	0	LOAG_04862T0	0.093	0	WUBG_00643T0	0.019	0	Smp_062720.1	0.92	0	psu|PFF0015c	9.4	0	Tc00.1047053506459.149	5e-16	35	psu|LmjF35.0290	4e-10	33	gb|TGME49_005680	0.0001	0	ECCG_01131T0	2e-07	36	gi|16804398	0.042	0	SAAG_02043T0	0.064	0	TBCT_02924.1	0.004	0	CAWT_01572	3e-06	0	HCAG_05774T0
	AF102	Group 5/6 grass pollen allergen	O23972	Hol l 5	264	P	yes	64	8768803	Bm1_13060	0.005	0	LOAG_04862T0	0.003	0	WUBG_15898T0	0.085	0	Smp_173190	5.2	0	psu|PFB0100c	0.2	0	Tc00.1047053506599.330	4e-12	30	psu|LmjF35.0290	2e-05	0	gb|TGME49_105080	0.002	0	ECCG_01131T0	9e-06	0	gi|16804326	0.001	0	SAAG_02373T0	0.056	0	TBCT_01658.1	0.002	0	CAWT_01572	0.0002	0	HCAG_10090T0
	AF102	Group 5/6 grass pollen allergen	O04828	Hor v 5	313	P	NA			Bm1_04240	0.009	0	LOAG_04862T0	0.012	0	WUBG_09715T0	0.7	0	Smp_128930	6.7	0	psu|PF14_0170	2.1	0	Tc00.1047053506599.330	2e-07	28	psu|LmjF08.0110	0.016	0	gb|TGME49_005680	0.014	0	ECCG_03539T0	0.02	0	gi|16804326	0.061	0	SAAG_00577T0	2.3	0	TBCT_01700.1	0.17	0	CAWT_00717	0.16	0	HCAG_06228T0
	AF102	Group 5/6 grass pollen allergen	Q9SC99	Lol p 5	301	P	yes	80	8262382	Bm1_04240	0.0001	0	LOAG_04862T0	0.057	0	WUBG_00643T0	0.078	0	Smp_173190	4.9	0	psu|PF14_0768	2	0	Tc00.1047053510377.134	2e-12	29	psu|LmjF35.0290	5e-09	32	gb|TGME49_010250	0.0004	0	ECCG_03539T0	4e-05	0	gi|16804326	0.099	0	SAAG_02043T0	0.051	0	TBCT_01340.1	0.015	0	CAWT_01572	0.0001	0	HCAG_10090T0
	AF102	Group 5/6 grass pollen allergen	P56164	Pha a 5	320	P	NA			Bm1_44025	0.045	0	LOAG_02673T0	0.53	0	WUBG_02942T0	0.017	0	Smp_144430	5.3	0	psu|PF11_0521	2.8	0	Tc00.1047053504081.420	2e-06	0	psu|LmjF04.0530	0.003	0	gb|TGME49_089380	0.005	0	ECCG_01131T0	0.009	0	gi|16803117	0.11	0	SAAG_00321T0	0.094	0	TBCT_00857.1	0.012	0	CAWT_02010	0.074	0	HCAG_01823T0
	AF102	Group 5/6 grass pollen allergen	O65868	Phl p 6	138	P	yes	75	10553075	Bm1_03520	0.82	0	LOAG_02104T0	1.5	0	WUBG_05274T0	1.6	0	Smp_140360	1.8	0	psu|MAL13P1.322	1.6	0	Tc00.1047053511727.230	1.4	0	psu|LmjF33.2010	0.86	0	gb|TGME49_009150	0.088	0	ECCG_00949T0	0.31	0	gi|16802378	0.089	0	SAAG_00322T0	0.18	0	TBCT_00756.1	0.55	0	CAWT_03949	0.004	0	HCAG_06976T0
	AF102	Group 5/6 grass pollen allergen	Q9FPR0	Poa p 5	303	P	NA			Bm1_29785	0.002	0	LOAG_09301T0	0.005	0	WUBG_09715T0	0.016	0	Smp_185100	3.8	0	psu|PFB0100c	0.063	0	Tc00.1047053506763.260	4e-14	31	psu|LmjF32.2350	7e-09	26	gb|TGME49_105080	0.0001	0	ECCG_03539T0	0.0002	0	gi|16803980	0.0008	0	SAAG_02043T0	0.44	0	TBCT_03819.1	0.001	0	CAWT_01572	6e-09	34	HCAG_02971T0
	AF102	Group 5/6 grass pollen allergen	Q70JP9	Tri a 5	231	P	NA			Bm1_42005	2	0	LOAG_08303T0	0.2	0	WUBG_02239T0	1.7	0	Smp_076560.2	16	0	psu|PF13_0356	0.36	0	Tc00.1047053510693.163	5e-05	0	psu|LmjF33.0730	0.023	0	gb|TGME49_105080	0.23	0	ECCG_03255T0	0.029	0	gi|16804496	3.8	0	SAAG_02373T0	0.1	0	TBCT_02027.1	0.068	0	CAWT_01572	0.012	0	HCAG_00321T0
	AF103	Hyaluronidase	Q08169	Api m 2	382	A	yes	100	12403934	Bm1_49235	1.8	0	LOAG_11260T0	3e-26	27	WUBG_08636T0	2e-21	39	Smp_169800	6.8	0	psu|PFE0875c	0.95	0	Tc00.1047053508717.30	0.028	0	psu|LmjF36.5390	0.24	0	gb|TGME49_113900	6.7	0	ECCG_02536T0	1.1	0	gi|16802849	2.5	0	SAAG_00356T0	0.99	0	TBCT_00075.1	0.02	0	CAWT_03138	1.4	0	HCAG_01845T0
	AF103	Hyaluronidase	P49371	Dol m 2	331	A	yes	63	3989146	Bm1_41765	1.2	0	LOAG_14903T0	1e-26	26	WUBG_08636T0	4e-18	30	Smp_154920	1.5	0	psu|PF07_0014	0.093	0	Tc00.1047053506961.25	0.2	0	psu|LmjF30.2750	8.2	0	gb|TGME49_049290	0.13	0	ECCG_01535T0	1.2	0	gi|16803522	2.8	0	SAAG_01642T0	0.83	0	TBCT_03702.1	1.6	0	CAWT_06076	0.5	0	HCAG_05088T0
	AF103	Hyaluronidase	Q9U6V9	pol a 2	367	A	NA			Bm1_20005	2.9	0	LOAG_14903T0	6e-30	27	WUBG_08636T0	6e-20	33	Smp_142010.1	0.99	0	psu|PF10_0078	0.021	0	Tc00.1047053503939.130	3.3	0	psu|LmjF36.6450	3.2	0	gb|TGME49_061020	3.7	0	ECCG_02604T0	0.78	0	gi|16803319	0.82	0	SAAG_00321T0	0.066	0	TBCT_02518.1	0.81	0	CAWT_04733	0.12	0	HCAG_02486T0
	AF103	Hyaluronidase	Q5D7H4	Ves v 2	340	A	yes	74	12403934	Bm1_17115	0.7	0	LOAG_11260T0	2e-21	24	WUBG_08636T0	1e-11	26	Smp_146300	0.081	0	psu|PF13_0339	0.033	0	Tc00.1047053511289.40	1.3	0	psu|LmjF23.0250	3.8	0	gb|TGME49_097800	1.2	0	ECCG_02894T0	0.54	0	gi|16803144	0.068	0	SAAG_00682T0	0.23	0	TBCT_02330.1	0.25	0	CAWT_03550	0.012	0	HCAG_04083T0
	AF104	Patatin family	Q9SEM0	Hev b 7	388	P	yes	64	11039838	Bm1_38650	2e-10	23	LOAG_06364T0	3e-11	23	WUBG_01241T0	2e-10	22	Smp_133290	0.015	0	psu|PFB0410c	6e-11	26	Tc00.1047053506357.10	1.6	0	psu|LmjF14.1060	0.41	0	gb|TGME49_031370	0.002	0	ECCG_00969T0	0.044	0	gi|16804244	0.88	0	SAAG_02127T0	0.45	0	TBCT_01990.1	0.51	0	CAWT_05017	0.043	0	HCAG_08758T0
	AF105	Clostridial neurotoxin	P04958	Clo t Toxoid	1315	B	NA			Bm1_43660	0.1	0	LOAG_10961T0	0.18	0	WUBG_16848T0	0.013	0	Smp_045310	0.31	0	psu|PFB0145c	1e-05	0	Tc00.1047053511215.119	2.2	0	psu|LmjF16.1430	0.75	0	gb|TGME49_039560	1.5	0	ECCG_04206T0	0.5	0	gi|16802883	0.68	0	SAAG_01847T0	0.032	0	TBCT_02890.1	4.4	0	CAWT_00490	0.004	0	HCAG_10367T0
	AF106	Lipase	P61872	Rhi o Lipase	392	P	NA			Bm1_52630	1e-14	29	LOAG_09088T0	1e-15	29	WUBG_00311T0	4e-14	30	Smp_049160	0.034	0	psu|PF14_0250	1e-06	0	Tc00.1047053511439.20	7e-25	31	psu|LmjF31.2460	1e-23	28	gb|TGME49_069300	0.043	0	ECCG_02576T0	0.059	0	gi|16804752	2	0	SAAG_01733T0	1	0	TBCT_00747.1	0.23	0	CAWT_03670	2e-16	29	HCAG_04128T0
	AF106	Lipase	O59952	The l Lipase	291	P	NA			Bm1_47735	2e-12	30	LOAG_09088T0	5e-09	28	WUBG_00311T0	2e-11	29	Smp_128680	7e-07	29	psu|PF14_0250	0.002	0	Tc00.1047053511439.20	4e-28	33	psu|LmjF31.2460	2e-26	30	gb|TGME49_077950	0.0004	0	ECCG_04294T0	0.76	0	gi|16804841	0.009	0	SAAG_01543T0	0.54	0	TBCT_00181.1	0.014	0	CAWT_03670	1e-22	29	HCAG_04128T0
	AF107	NAC domain	Q13765	Hom s 2	215	A	NA			Bm1_06630	5e-48	56	LOAG_08631T0	5e-49	55	WUBG_01821T0	2e-25	40	Smp_018530	5e-50	50	psu|PFF1050w	2e-23	33	Tc00.1047053510241.60	2e-27	38	psu|LmjF04.0770	1e-33	43	gb|TGME49_005560	1e-43	49	ECCG_02421T0	0.002	0	gi|16803860	0.11	0	SAAG_00983T0	0.001	0	TBCT_02860.1	0.3	0	CAWT_02729	1e-30	41	HCAG_05099T0
	AF108	DJ-1/PfpI family	Q6YK78	Cand a 3	236	F	yes	64	9636810	Bm1_07685	0.013	0	LOAG_00862T0	0.16	0	WUBG_06593T0	0.019	0	Smp_156120	16	0	psu|PFF0845c	0.22	0	Tc00.1047053506605.229	0.59	0	psu|LmjF14.0040	0.092	0	gb|TGME49_063150	1.5	0	ECCG_00492T0	2e-06	0	gi|16803860	0.61	0	SAAG_00969T0	3e-06	0	TBCT_03821.1	1.3	0	CAWT_02584	1e-137	99	HCAG_11046T0
	AF109	Fungalysin metalloprotease	P46075	Asp f 5	634	F	yes	93	9482698	Bm1_04595	0.39	0	LOAG_12305T0	2.1	0	WUBG_03068T0	0.42	0	Smp_159960.2	0.14	0	psu|PF14_0633	0.093	0	Tc00.1047053511827.130	1.7	0	psu|LmjF22.0170	0.26	0	gb|TGME49_119860	0.1	0	ECCG_02034T0	1.5	0	gi|16804398	0.022	0	SAAG_00476T0	0.27	0	TBCT_03474.1	4.5	0	CAWT_00717	0.17	0	HCAG_08701T0
	AF110	Nuclear transport factor 2	Q8NKB7	Alt a NTF2	124	F	no	1	12653793	Bm1_17200	1e-13	36	LOAG_07067T0	4e-14	36	WUBG_07172T0	3e-14	36	Smp_037700	4e-08	27	psu|PF14_0122	2e-18	37	Tc00.1047053509567.40	7e-19	35	psu|LmjF10.0850	5e-19	35	gb|TGME49_033350	2e-21	46	ECCG_00781T0	3.6	0	gi|16802279	0.62	0	SAAG_01735T0	0.19	0	TBCT_00580.1	1.3	0	CAWT_00422	3e-30	51	HCAG_00131T0
	AF110	Nuclear transport factor 2	Q8NJ52	Cla h NTF2	125	F	no	1	12653793	Bm1_17200	8e-12	34	LOAG_07067T0	2e-12	34	WUBG_07172T0	1e-12	34	Smp_037700	3e-07	25	psu|PF14_0122	2e-18	35	Tc00.1047053509567.40	1e-17	36	psu|LmjF10.0850	6e-15	33	gb|TGME49_033350	1e-23	48	ECCG_00203T0	0.96	0	gi|16802311	1.1	0	SAAG_00470T0	1.6	0	TBCT_03492.1	1	0	CAWT_00422	2e-36	54	HCAG_00131T0
	AF111	Mite Group 2 allergen family	Q9BIX2	Der f 2	170	A	yes	94	3770975	Bm1_35600	0.013	0	LOAG_00908T0	0.16	0	WUBG_18001T0	2.4	0	Smp_130830	8.8	0	psu|PFB0665w	0.13	0	Tc00.1047053506357.180	0.98	0	psu|LmjF04.1180	11	0	gb|TGME49_106370	7.4	0	ECCG_00221T0	1.3	0	gi|16802692	0.003	0	SAAG_02232T0	0.11	0	TBCT_02398.1	2.3	0	CAWT_04800	6	0	HCAG_09522T0
	AF111	Mite Group 2 allergen family	P49278	Der p 2	146	A	yes	91	19021722	Bm1_35600	0.0009	0	LOAG_00908T0	0.005	0	WUBG_03704T0	0.005	0	Smp_132800	14	0	psu|PFD0020c	1.8	0	Tc00.1047053506357.180	0.93	0	psu|LmjF31.2430	8.2	0	gb|TGME49_033530	1.4	0	ECCG_02400T0	3.8	0	gi|16802692	0.005	0	SAAG_00667T0	0.74	0	TBCT_02398.1	0.62	0	CAWT_01481	1.5	0	HCAG_05761T0
	AF111	Mite Group 2 allergen family	Q27V36	Der s 2	146	A	yes	91	8556562	Bm1_35600	0.003	0	LOAG_00908T0	0.068	0	WUBG_18001T0	0.62	0	Smp_130830	4.7	0	psu|PF13_0148	0.6	0	Tc00.1047053506357.180	1.6	0	psu|LmjF04.0500	2.8	0	gb|TGME49_106370	5.4	0	ECCG_03682T0	3.8	0	gi|16802692	0.002	0	SAAG_02232T0	0.088	0	TBCT_00338.1	3.1	0	CAWT_04590	2.6	0	HCAG_10654T0
	AF111	Mite Group 2 allergen family	Q9TZZ2	Eur m 2	145	A	yes	81	9275144	Bm1_05305	1.2	0	LOAG_00908T0	0.014	0	WUBG_18001T0	1	0	Smp_156590	13	0	psu|PFE0345c	1	0	Tc00.1047053506703.140	3.5	0	psu|LmjF36.4620	4.7	0	gb|TGME49_022420	1.4	0	ECCG_03682T0	2.9	0	gi|16802692	0.005	0	SAAG_02232T0	0.19	0	TBCT_02669.1	2.3	0	CAWT_02073	2	0	HCAG_08052T0
	AF111	Mite Group 2 allergen family	Q9U5P7	Gly d 2	128	A	yes	94	11240953	Bm1_35600	0.036	0	LOAG_08736T0	0.44	0	WUBG_03704T0	0.055	0	Smp_138890.1	12	0	psu|MAL8P1.40	2.9	0	Tc00.1047053509805.50	0.24	0	psu|LmjF30.0350	1.6	0	gb|TGME49_093810	1.8	0	ECCG_02141T0	3	0	gi|16803655	0.29	0	SAAG_02347T0	0.77	0	TBCT_00243.1	1.1	0	CAWT_01522	4.4	0	HCAG_08784T0
	AF111	Mite Group 2 allergen family	P80384	Lep d 2	141	A	yes	87	1611545	Bm1_35600	0.0004	0	LOAG_14101T0	1.6	0	WUBG_03704T0	5e-06	0	Smp_194840	0.13	0	psu|PFI0055c	11	0	Tc00.1047053504015.30	0.39	0	psu|LmjF31.3130	0.89	0	gb|TGME49_002840	0.011	0	ECCG_03097T0	0.19	0	gi|16804858	1	0	SAAG_00319T0	6	0	TBCT_00924.1	0.031	0	CAWT_03604	3.2	0	HCAG_05861T0
	AF111	Mite Group 2 allergen family	O02380	Tyr p 2	141	A	yes	72	20683648	Bm1_35600	0.0003	0	LOAG_00908T0	9e-06	0	WUBG_03704T0	2e-05	0	Smp_138890.1	0.077	0	psu|PF08_0105	1.6	0	Tc00.1047053509805.50	1.5	0	psu|LmjF31.2500	2.6	0	gb|TGME49_012810	0.054	0	ECCG_02464T0	8.1	0	gi|16804787	0.46	0	SAAG_02045T0	2.7	0	TBCT_02386.1	0.76	0	CAWT_00681	0.85	0	HCAG_05022T0
	AF112	Plastocyanin-like protein	P00304	Amb a 3	101	P	yes	51	81221	Bm1_24255	0.61	0	LOAG_00216T0	2.7	0	WUBG_10960T0	0.29	0	Smp_068090	4.1	0	psu|PF10_0120	3.1	0	Tc00.1047053507087.70	1.1	0	psu|LmjF18.0140	0.59	0	gb|TGME49_079410	5.8	0	ECCG_03870T0	0.81	0	gi|16802626	0.68	0	SAAG_01135T0	2.3	0	TBCT_00615.1	0.02	0	CAWT_04704	3.5	0	HCAG_01582T0
	AF113	Ribonuclease N1 and T1	P67875	Asp f 1	176	F	yes	83	10848921	Bm1_41340	0.77	0	LOAG_07917T0	0.63	0	WUBG_01643T0	0.06	0	Smp_152890	5.6	0	psu|PF08_0140	1.1	0	Tc00.1047053509247.20	0.81	0	psu|LmjF23.1070	0.043	0	gb|TGME49_089060	0.71	0	ECCG_04194T0	1.8	0	gi|16804392	1.1	0	SAAG_02422T0	1.7	0	TBCT_00547.1	7.2	0	CAWT_03117	0.34	0	HCAG_02965T0
	AF115	High molecular weight glutenin	P10388	Tri a 26	839	P	yes	20	16339549	Bm1_16850	3e-27	27	LOAG_03919T0	2e-29	27	WUBG_10099T0	9e-21	25	Smp_123830	6e-30	28	psu|PFB0095c	3e-30	26	Tc00.1047053511671.60	3e-25	25	psu|LmjF27.0380	4e-35	34	gb|TGME49_001180	1e-25	24	ECCG_01312T0	1e-18	25	gi|16803365	0.05	0	SAAG_01195T0	0.001	0	TBCT_00020.1	2e-16	28	CAWT_04944	4e-23	26	HCAG_03773T0
	AF116	SART-1 family	O43290	Hom s 1	800	A	NA			Bm1_10910	1e-114	35	LOAG_07174T0	1e-115	35	WUBG_03383T0	5e-87	33	Smp_176840	5e-95	33	psu|PFC1060c	4e-34	24	Tc00.1047053507895.124	8e-11	18	psu|LmjF28.2210	1e-14	19	gb|TGME49_118140	3e-38	25	ECCG_00324T0	0.016	0	gi|16803101	0.11	0	SAAG_01744T0	0.004	0	TBCT_02106.1	0.1	0	CAWT_04682	4e-12	19	HCAG_10941T0
	AF117	Endonuclease/exonuclease/phosphatase family	O76745	Cim l Nitrophorin	302	A	NA			Bm1_02165	4e-19	32	LOAG_05913T0	2e-19	33	WUBG_06481T0	2e-19	33	Smp_050830	2e-17	25	psu|PF07_0024	1e-10	36	Tc00.1047053506625.60	1e-16	26	psu|LmjF34.1220	5e-10	27	gb|TGME49_038400	2e-07	32	ECCG_02947T0	0.16	0	gi|16802323	0.13	0	SAAG_02045T0	2.8	0	TBCT_00380.1	4.1	0	CAWT_06050	5e-18	31	HCAG_04077T0
	AF118	Group 5 ragweed allergen	P02878	Amb a 5	45	P	no	17	7685794	Bm1_36670	0.16	0	LOAG_09726T0	0.085	0	WUBG_04699T0	0.17	0	Smp_170550.1	0.63	0	psu|MAL8P1.124	0.36	0	Tc00.1047053507797.9	1.1	0	psu|LmjF29.0600	0.79	0	gb|TGME49_060490	3.4	0	ECCG_01534T0	2.3	0	gi|16803190	21	0	SAAG_01347T0	8.3	0	TBCT_03640.1	4	0	CAWT_02445	7.9	0	HCAG_10239T0
	AF118	Group 5 ragweed allergen	P43174	Amb t 5	77	P	no	5	3862954	Bm1_36670	0.095	0	LOAG_09726T0	0.05	0	WUBG_04699T0	0.098	0	Smp_170550.1	0.22	0	psu|MAL8P1.124	0.28	0	Tc00.1047053504625.40	2.5	0	psu|LmjF29.0600	1	0	gb|TGME49_060490	3.4	0	ECCG_03826T0	1.4	0	gi|16804292	6.9	0	SAAG_00699T0	4.8	0	TBCT_01106.1	0.62	0	CAWT_05982	2.1	0	HCAG_10239T0
	AF119	Triabin family	P54962	Bla g 4	182	A	yes	60	8537384	Bm1_52005	5.2	0	LOAG_12365T0	1.1	0	WUBG_11686T0	0.14	0	Smp_127740	7.8	0	psu|PF11_0388	0.32	0	Tc00.1047053504087.20	1.9	0	psu|LmjF19.0590	7.4	0	gb|TGME49_031370	0.052	0	ECCG_01117T0	1.5	0	gi|16804352	0.54	0	SAAG_01027T0	0.48	0	TBCT_03552.1	7.6	0	CAWT_03492	0.055	0	HCAG_02707T0
	AF119	Triabin family	Q9U6R6	Tria p 1	169	A	NA			Bm1_48715	7.9	0	LOAG_14750T0	1.7	0	WUBG_03542T0	0.12	0	Smp_135060	33	0	psu|PF07_0115	2.3	0	Tc00.1047053507265.15	6.3	0	psu|LmjF32.3930	19	0	gb|TGME49_116310	5.6	0	ECCG_03832T0	11	0	gi|16803005	0.63	0	SAAG_00322T0	0.19	0	TBCT_03016.1	5.2	0	CAWT_01519	3.5	0	HCAG_05514T0
	AF121	BCL7 family	Q9BQE9	Hom s 3	202	A	NA			Bm1_41045	1e-17	37	LOAG_02275T0	4e-18	37	WUBG_09248T0	8e-15	60	Smp_136770	3e-14	35	psu|PF11_0506	0.007	0	Tc00.1047053509493.80	0.001	0	psu|LmjF35.0540	0.0008	0	gb|TGME49_029440	0.0003	0	ECCG_02904T0	0.2	0	gi|16802095	0.37	0	SAAG_00319T0	0.003	0	TBCT_03803.1	0.28	0	CAWT_05101	6e-05	0	HCAG_06379T0
	AF122	Alliinase	P31756	All a Alliin lyase	447	P	NA			Bm1_52405	0.001	0	LOAG_06676T0	0.002	0	WUBG_10008T0	0.0008	0	Smp_159520	1.3	0	psu|MAL7P1.17	0.14	0	Tc00.1047053506173.140	0.17	0	psu|LmjF29.0530	1.9	0	gb|TGME49_094330	8e-06	0	ECCG_01364T0	0.58	0	gi|16803936	4e-06	0	SAAG_00847T0	0.007	0	TBCT_00332.1	0.032	0	CAWT_01374	0.002	0	HCAG_06309T0
	AF122	Alliinase	P31757	All c Alliin lyase	479	P	NA			Bm1_52405	0.0001	0	LOAG_06676T0	6e-05	0	WUBG_10008T0	0.0005	0	Smp_159520	3.1	0	psu|PF10_0313	0.11	0	Tc00.1047053506173.140	0.14	0	psu|LmjF32.3690	3.5	0	gb|TGME49_094330	2e-05	0	ECCG_01880T0	0.63	0	gi|16803936	1e-05	0	SAAG_00847T0	0.15	0	TBCT_00332.1	0.38	0	CAWT_01374	0.002	0	HCAG_06309T0
	AF122	Alliinase	Q01594	All s Alliin lyase	486	P	yes	100	14713923	Bm1_52405	0.02	0	LOAG_06676T0	0.004	0	WUBG_12016T0	0.063	0	Smp_159520	0.17	0	psu|PFE1465w	0.15	0	Tc00.1047053510661.150	1.2	0	psu|LmjF29.0530	2.7	0	gb|TGME49_094330	0.0001	0	ECCG_00539T0	1.9	0	gi|16803936	0.061	0	SAAG_01779T0	0.12	0	TBCT_02988.1	0.23	0	CAWT_01374	0.002	0	HCAG_06309T0
	AF123	Isoflavone reductase family	Q9FUW6	Bet v 6	308	P	no	32	10550744	Bm1_11415	0.005	0	LOAG_10415T0	0.002	0	WUBG_17270T0	0.002	0	Smp_135100	1.3	0	psu|MAL13P1.226	1.6	0	Tc00.1047053511691.39	0.021	0	psu|LmjF06.0350	2.6	0	gb|TGME49_064720	6.5	0	ECCG_02840T0	0.033	0	gi|16804429	0.0002	0	SAAG_00885T0	1e-05	0	TBCT_03650.1	0.002	0	CAWT_05253	4e-05	0	HCAG_07800T0
	AF123	Isoflavone reductase family	Q8RYC0	Cry j IFR	306	P	yes	76	12100055	Bm1_49695	0.27	0	LOAG_09025T0	0.1	0	WUBG_06690T0	0.23	0	Smp_135100	5	0	psu|MAL13P1.301	2.1	0	Tc00.1047053509633.30	0.13	0	psu|LmjF10.1010	0.06	0	gb|TGME49_027450	2.2	0	ECCG_01144T0	9e-05	0	gi|16803517	0.016	0	SAAG_00885T0	3e-06	0	TBCT_03711.1	0.0005	0	CAWT_05253	0.0003	0	HCAG_07800T0
	AF124	Apovitellenin I	P02659	Gal d Apo I	106	A	no	23	3654006	Bm1_34655	3	0	LOAG_14804T0	0.71	0	WUBG_17039T0	2.4	0	Smp_180910.1	16	0	psu|PF11_0408	0.8	0	Tc00.1047053506529.480	0.83	0	psu|LmjF28.2290	0.15	0	gb|TGME49_100020	0.52	0	ECCG_01377T0	0.51	0	gi|16803956	1.3	0	SAAG_02572T0	0.68	0	TBCT_00262.1	0.41	0	CAWT_05085	3.7	0	HCAG_08899T0
	AF125	Rubber elongation factor family	P15252	Hev b 1	138	P	yes	52	9389300	Bm1_01685	0.48	0	LOAG_10633T0	0.88	0	WUBG_07989T0	0.94	0	Smp_143250	3.1	0	psu|PFI0010c	0.41	0	Tc00.1047053503653.30	1.8	0	psu|LmjF36.4370	1.5	0	gb|TGME49_025700	0.74	0	ECCG_00578T0	2.6	0	gi|16804124	0.44	0	SAAG_00784T0	2.6	0	TBCT_03428.1	2.7	0	CAWT_06101	0.47	0	HCAG_08264T0
	AF126	Insect venom phospholipase A2	P00630	Api m 1	167	A	yes	97	19120073	Bm1_28735	0.063	0	LOAG_12595T0	0.26	0	WUBG_19170T0	0.21	0	Smp_108380	11	0	psu|PFL0115w	1	0	Tc00.1047053507681.180	2.1	0	psu|LmjF07.0180	8.2	0	gb|TGME49_066740	5.5	0	ECCG_01215T0	0.97	0	gi|16804124	6.8	0	SAAG_01017T0	2.7	0	TBCT_00755.1	3	0	CAWT_04195	7.5	0	HCAG_11671T0
	AF126	Insect venom phospholipase A2	P82971	Bom t 1	136	A	NA			Bm1_51445	1.3	0	LOAG_14440T0	0.13	0	WUBG_04837T0	1.2	0	Smp_143300	2.9	0	psu|PFF1565c	0.4	0	Tc00.1047053506905.59	3	0	psu|LmjF06.0600	2.4	0	gb|TGME49_036980	1.6	0	ECCG_00626T0	2	0	gi|16802464	0.33	0	SAAG_01838T0	0.13	0	TBCT_03480.1	1.6	0	CAWT_04509	0.21	0	HCAG_03412T0
	AF127	Group 1 cockroach allergen	O96522	Bla g 1	492	A	yes	77	7642642	Bm1_45870	0.009	0	LOAG_01804T0	0.003	0	WUBG_01698T0	0.01	0	Smp_148790	0.85	0	psu|PFE0870w	0.031	0	Tc00.1047053511557.50	0.086	0	psu|LmjF36.5190	6.1	0	gb|TGME49_031380	1.1	0	ECCG_01160T0	3.2	0	gi|16804532	0.009	0	SAAG_00647T0	0.27	0	TBCT_00501.1	2	0	CAWT_00831	2.4	0	HCAG_08790T0
	AF127	Group 1 cockroach allergen	Q9TZR6	Per a 1	231	A	yes	100	10221434	Bm1_38570	0.063	0	LOAG_14206T0	0.088	0	WUBG_00349T0	0.024	0	Smp_166780	0.49	0	psu|PF14_0116	0.47	0	Tc00.1047053507641.230	2.2	0	psu|LmjF27.1070	1.3	0	gb|TGME49_100260	0.035	0	ECCG_02570T0	1.2	0	gi|16804452	0.45	0	SAAG_01266T0	0.4	0	TBCT_03209.1	0.26	0	CAWT_05843	0.14	0	HCAG_03665T0
	AF129	Cerato-platanin	O60022	Asp f 15	152	F	NA			Bm1_19095	1.3	0	LOAG_07176T0	5.3	0	WUBG_10046T0	0.39	0	Smp_004080	34	0	psu|MAL13P1.295	9.6	0	Tc00.1047053509399.180	0.46	0	psu|LmjF11.0410	0.28	0	gb|TGME49_035160	1.2	0	ECCG_00813T0	4.1	0	gi|16802431	0.18	0	SAAG_00298T0	2.3	0	TBCT_01727.1	0.39	0	CAWT_01967	0.068	0	HCAG_05852T0
	AF131	Redoxin	O43099	Asp f 3	168	F	yes	72	9412580	Bm1_43195	0.41	0	LOAG_06244T0	0.15	0	WUBG_09998T0	0.61	0	Smp_059480	0.011	0	psu|MAL7P1.159	5e-10	27	Tc00.1047053509463.41	0.33	0	psu|LmjF36.4360	2.2	0	gb|TGME49_086630	6e-17	34	ECCG_02842T0	0.57	0	gi|16802200	1.4	0	SAAG_01127T0	1.6	0	TBCT_01562.1	0.16	0	CAWT_03554	3e-30	37	HCAG_03188T0
	AF131	Redoxin	P14292	Cand b 2	167	F	NA			Bm1_53515	2	0	LOAG_01627T0	0.75	0	WUBG_01742T0	0.79	0	Smp_066370	2.2	0	psu|MAL7P1.159	6e-14	31	Tc00.1047053511727.230	2.7	0	psu|LmjF31.1070	2.2	0	gb|TGME49_086630	3e-19	38	ECCG_00690T0	1.3	0	gi|16804237	0.81	0	SAAG_00868T0	0.42	0	TBCT_02187.1	1	0	CAWT_03554	6e-27	37	HCAG_03188T0
	AF131	Redoxin	P56577	mal f 2	177	F	yes	72	9675120	Bm1_08345	0.2	0	LOAG_07768T0	1.4	0	WUBG_06023T0	1.2	0	Smp_161730	5.7	0	psu|MAL7P1.159	5e-13	26	Tc00.1047053511733.60	5.3	0	psu|LmjF17.1150	5.3	0	gb|TGME49_086630	1e-17	39	ECCG_01940T0	1.4	0	gi|16802256	0.061	0	SAAG_01616T0	0.002	0	TBCT_01882.1	0.29	0	CAWT_03554	1e-23	35	HCAG_03188T0
	AF131	Redoxin	P56578	mal f 3	166	F	yes	70	9675120	Bm1_33165	0.036	0	LOAG_05957T0	0.002	0	WUBG_00388T0	3.9	0	Smp_012670.1	19	0	psu|MAL7P1.159	1e-15	33	Tc00.1047053508837.189	3.5	0	psu|LmjF25.0380	0.96	0	gb|TGME49_086630	8e-17	34	ECCG_00983T0	0.013	0	gi|16802628	2.3	0	SAAG_01616T0	0.064	0	TBCT_02461.1	1	0	CAWT_03554	3e-27	38	HCAG_03188T0
	AF131	Redoxin	O93969	mala s 5	172	F	no	32	11859945	Bm1_51550	2.8	0	LOAG_05045T0	8.6	0	WUBG_17068T0	2.4	0	Smp_158110.2	9	0	psu|MAL7P1.159	2e-12	28	Tc00.1047053508641.320	1.3	0	psu|LmjF16.1290	1.3	0	gb|TGME49_086630	4e-17	38	ECCG_01484T0	0.6	0	gi|16802230	0.22	0	SAAG_01616T0	0.014	0	TBCT_01534.1	0.82	0	CAWT_03554	2e-26	35	HCAG_03188T0
	AF131	Redoxin	Q9Y8B8	Pen c 3	167	F	no	46	10756236	Bm1_21415	0.41	0	LOAG_01338T0	0.04	0	WUBG_13815T0	0.21	0	Smp_158110.1	0.0002	0	psu|MAL7P1.159	1e-11	28	Tc00.1047053509931.10	4.7	0	psu|LmjF23.0040	0.74	0	gb|TGME49_086630	5e-17	32	ECCG_02842T0	0.33	0	gi|16802200	0.62	0	SAAG_01127T0	0.32	0	TBCT_02461.1	0.27	0	CAWT_03554	3e-29	36	HCAG_03188T0
	AF132	Fibrinogen alpha-chain	P02672	Bos d Fibrin	615	A	NA		8721528	Bm1_03900	2e-07	39	LOAG_03892T0	2e-09	44	WUBG_09746T0	8e-07	37	Smp_156670	0.0001	0	psu|PF14_0706	2e-10	27	Tc00.1047053511451.59	4e-07	36	psu|LmjF31.1440	7e-07	27	gb|TGME49_065240	1e-09	29	ECCG_02051T0	0.64	0	gi|16803844	0.3	0	SAAG_02532T0	0.004	0	TBCT_01709.1	4e-08	31	CAWT_02625	9e-05	0	HCAG_04404T0
	AF133	Alginate lyase	Q39962	Hev b Citrate binding Protein	238	P	NA			Bm1_47365	0.95	0	LOAG_02991T0	0.6	0	WUBG_01862T0	0.21	0	Smp_152650	4.4	0	psu|PFL1390w	1.1	0	Tc00.1047053503411.20	8.7	0	psu|LmjF26.2380	3	0	gb|TGME49_090190	4.5	0	ECCG_01464T0	0.34	0	gi|16802143	1	0	SAAG_01607T0	2.1	0	TBCT_01430.1	1.3	0	CAWT_01065	0.24	0	HCAG_02506T0
	AF134	Fel d 1 family	P30438	Fel d 1	92	A	yes	95	18477016	Bm1_51290	0.12	0	LOAG_00073T0	0.022	0	WUBG_12376T0	2.4	0	Smp_135100	35	0	psu|PF10_0079	1.8	0	Tc00.1047053510657.10	5.3	0	psu|LmjF36.1440	1.8	0	gb|TGME49_007750	2.5	0	ECCG_00716T0	0.36	0	gi|16803777	0.17	0	SAAG_01744T0	0.43	0	TBCT_02889.1	0.48	0	CAWT_02471	1.2	0	HCAG_04295T0
	AF135	Ole e 6 family	O24172	Ole e 6	50	P	no	50	18849614	Bm1_29730	1.1	0	LOAG_02616T0	0.11	0	WUBG_06384T0	1.1	0	Smp_150770	6.9	0	psu|PF07_0086	0.033	0	Tc00.1047053506297.190	12	0	psu|LmjF25.1350	0.6	0	gb|TGME49_045490	7.5	0	ECCG_03322T0	6.8	0	gi|16803213	5.4	0	SAAG_01908T0	4.8	0	TBCT_02279.1	9.1	0	CAWT_01867	0.92	0	HCAG_03359T0
	AF136	Translationally controlled tumour protein	A1KXP4	Cla h TCTP	169	F	no	3	17645945	Bm1_31480	6e-21	37	LOAG_00385T0	2e-21	37	WUBG_02046T0	3e-20	36	Smp_054240	2e-28	40	psu|PFE0545c	3e-19	31	Tc00.1047053506207.50	3e-24	34	psu|LmjF24.1510	1e-24	36	gb|TGME49_051680	8e-26	36	ECCG_04489T0	0.76	0	gi|16802134	0.02	0	SAAG_01036T0	0.72	0	TBCT_02947.1	0.61	0	CAWT_01444	9e-54	57	HCAG_02143T0
	AF136	Translationally controlled tumour protein	P13693	Hom s TCTP	172	A	NA			Bm1_31480	2e-23	37	LOAG_00385T0	2e-22	35	WUBG_02046T0	1e-22	36	Smp_054240	2e-31	38	psu|PFE0545c	5e-23	33	Tc00.1047053510065.30	6e-17	31	psu|LmjF24.1510	3e-17	34	gb|TGME49_051680	2e-24	36	ECCG_03044T0	1.3	0	gi|16803307	1.1	0	SAAG_01315T0	1.7	0	TBCT_00897.1	1.4	0	CAWT_01444	2e-33	43	HCAG_02143T0
	AF137	SXP/RAL-2 family	A7M6Q6	Ani s 8	150	A	no	25	17689675	Bm1_42865	6e-11	31	LOAG_07253T0	5e-10	31	WUBG_05889T0	5e-10	27	Smp_147520	0.091	0	psu|PFB0010w	0.009	0	Tc00.1047053510693.163	0.008	0	psu|LmjF14.1100	0.001	0	gb|TGME49_057180	0.007	0	ECCG_01131T0	0.033	0	gi|16802250	0.007	0	SAAG_01658T0	7e-05	0	TBCT_02719.1	0.17	0	CAWT_05788	0.051	0	HCAG_01565T0
	AF137	SXP/RAL-2 family	B2XCP1	Ani s 9	147	A	no	13	18378015	Bm1_42870	5e-21	37	LOAG_07252T0	9e-15	30	WUBG_05889T0	7e-21	40	Smp_125430	2.2	0	psu|PF11_0486	0.011	0	Tc00.1047053506303.80	0.013	0	psu|LmjF36.5250	0.002	0	gb|TGME49_052880	0.009	0	ECCG_01131T0	0.032	0	gi|16803264	0.058	0	SAAG_01658T0	0.001	0	TBCT_02476.1	0.17	0	CAWT_03405	0.92	0	HCAG_05774T0
	AF138	RuBisCO large chain	P00870	Spi o RuBisCO	123	P	NA			Bm1_53510	1.8	0	LOAG_08905T0	0.67	0	WUBG_18079T0	0.33	0	Smp_151120	20	0	psu|PFI0505c	2	0	Tc00.1047053506943.100	0.61	0	psu|LmjF09.0340	1.5	0	gb|TGME49_108070	1.2	0	ECCG_04319T0	2.8	0	gi|16802135	0.8	0	SAAG_02445T0	0.41	0	TBCT_02325.1	4.9	0	CAWT_05417	1.1	0	HCAG_09289T0
	AF139	Eukaryotic-type carbonic anhydrase	Q75N34	Dio o TSP	268	P	NA			Bm1_32535	6e-16	27	LOAG_08956T0	7e-14	26	WUBG_10089T0	5e-13	28	Smp_028670	2e-13	28	psu|PF11_0411	0.006	0	Tc00.1047053509597.20	2e-12	26	psu|LmjF28.0480	2e-09	23	gb|TGME49_059950	0.0003	0	ECCG_03654T0	2	0	gi|16802853	4e-19	25	SAAG_01696T0	2.4	0	TBCT_03042.1	2.7	0	CAWT_01898	0.84	0	HCAG_04542T0
	AF140	Carboxylesterase	B2D0J5	Api m 8	557	A	no	45	IUIS	Bm1_33610	5e-48	40	LOAG_04593T0	2e-49	31	WUBG_01667T0	3e-48	40	Smp_136690	5e-38	37	psu|PFE1120w	0.08	0	Tc00.1047053510823.30	0.009	0	psu|LmjF15.0320	0.02	0	gb|TGME49_117000	3e-30	47	ECCG_04442T0	0.34	0	gi|16804128	0.092	0	SAAG_00278T0	3e-21	31	TBCT_01998.1	3e-33	31	CAWT_05926	0.039	0	HCAG_05795T0
	AF141	Potato inhibitor I family	B3FHM6	Tri a SPI	84	P	no	13	18490745	Bm1_22880	0.071	0	LOAG_10772T0	2	0	WUBG_07141T0	0.075	0	Smp_183800	0.003	0	psu|MAL7P1.87	0.27	0	Tc00.1047053509395.20	1.9	0	psu|LmjF36.2640	0.45	0	gb|TGME49_019660	2	0	ECCG_01975T0	6.8	0	gi|16804078	0.097	0	SAAG_02583T0	0.95	0	TBCT_03324.1	0.16	0	CAWT_04439	1.2	0	HCAG_03343T0
	AF142	WD-40 repeat	B2ZPG7	For t 2	325	P	yes	64	21470242	Bm1_48300	4e-93	46	LOAG_08550T0	8e-93	46	WUBG_01722T0	3e-55	52	Smp_006000	3e-42	48	psu|MAL7P1.81	1e-48	32	Tc00.1047053511589.230	4e-60	37	psu|LmjF36.3880	3e-39	30	gb|TGME49_089830	4e-65	39	ECCG_02579T0	0.52	0	gi|16804514	0.24	0	SAAG_02164T0	1.4	0	TBCT_03183.1	0.53	0	CAWT_01105	3e-87	45	HCAG_04356T0
	AF143	Leucine-rich repeat	Q4W1G0	Tri a 23kd	137	P	NA			Bm1_33310	0.019	0	LOAG_10066T0	0.035	0	WUBG_12920T0	0.008	0	Smp_132200	0.0002	0	psu|PFF0575c	0.18	0	Tc00.1047053506559.190	0.36	0	psu|LmjF21.1170	7e-08	28	gb|TGME49_067550	0.086	0	ECCG_00019T0	0.31	0	gi|16802774	5e-08	34	SAAG_01060T0	4.3	0	TBCT_01403.1	1.2	0	CAWT_05641	0.002	0	HCAG_07706T0
	AF145	Phosphoglycerate kinase	P46273	Cand a PGK	417	F	NA			Bm1_01925	1e-142	60	LOAG_06198T0	1e-141	60	WUBG_03621T0	1e-141	60	Smp_018890	8e-87	65	psu|PFI1105w	1e-147	60	Tc00.1047053511419.40	4e-89	44	psu|LmjF20.0100	9e-90	42	gb|TGME49_118230	1e-144	59	ECCG_02278T0	3e-64	37	gi|16804496	5e-95	48	SAAG_01198T0	3e-90	46	TBCT_01413.1	2e-67	38	CAWT_05284	0	100	HCAG_03385T0
	AF146	Troponin I and T	P05547	Pon l 7	201	A	no	8	IUIS	Bm1_35060	2e-44	54	LOAG_08015T0	2e-44	54	WUBG_04577T0	7e-45	55	Smp_059170.2	3e-18	30	psu|PF11_0486	7e-13	29	Tc00.1047053507895.124	1e-05	0	psu|LmjF28.2210	2e-06	0	gb|TGME49_113900	2e-10	31	ECCG_01131T0	0.0003	0	gi|16803931	0.0005	0	SAAG_01643T0	8e-05	0	TBCT_00467.1	0.015	0	CAWT_05863	7e-09	25	HCAG_00174T0
	AF147	Collagenase	Q9S0X0	Clo hi Collagenase	1118	B	NA			Bm1_20125	0.33	0	LOAG_08354T0	0.006	0	WUBG_07815T0	0.2	0	Smp_135610	0.76	0	psu|PF13_0265	0.0002	0	Tc00.1047053511081.60	0.63	0	psu|LmjF34.2100	0.37	0	gb|TGME49_081990	0.25	0	ECCG_04590T0	0.029	0	gi|16804482	0.003	0	SAAG_02373T0	0.035	0	TBCT_01498.1	4.8	0	CAWT_02132	0.008	0	HCAG_02008T0
	AF148	Snake venom phospholipase A2	P24605	Bot as 1	137	A	NA			Bm1_14080	1e-10	37	LOAG_00596T0	5e-10	35	WUBG_04252T0	0.0007	0	Smp_170550.1	1.8	0	psu|MAL7P1.32	0.11	0	Tc00.1047053506605.229	0.8	0	psu|LmjF26.0750	1.1	0	gb|TGME49_009250	0.43	0	ECCG_03256T0	4.4	0	gi|16803997	2.2	0	SAAG_01843T0	1.1	0	TBCT_00985.1	3.6	0	CAWT_03594	1.4	0	HCAG_05806T0
	AF148	Snake venom phospholipase A3	Q6JK69	Bot at 1	138	A	NA			Bm1_14080	2e-12	35	LOAG_00596T0	3e-12	38	WUBG_04252T0	0.0001	0	Smp_170550.1	4	0	psu|PFB0580w	0.01	0	Tc00.1047053506605.229	1.1	0	psu|LmjF32.2150	1.1	0	gb|TGME49_009250	0.03	0	ECCG_00191T0	0.91	0	gi|16804222	1.7	0	SAAG_01843T0	0.3	0	TBCT_02321.1	3.6	0	CAWT_02123	3.1	0	HCAG_08094T0
	AF148	Snake venom phospholipase A4	P0C942	Lac mu 1	122	A	NA			Bm1_14080	0.033	0	LOAG_00596T0	0.1	0	WUBG_01123T0	2.7	0	Smp_135270	3.1	0	psu|PFA0560c	2	0	Tc00.1047053508479.250	8.8	0	psu|LmjF30.2340	9.2	0	gb|TGME49_086740	3.5	0	ECCG_04512T0	13	0	gi|16803614	5.1	0	SAAG_00436T0	6	0	TBCT_01956.1	24	0	CAWT_00685	15	0	HCAG_10940T0
	AF149	Proteasome subunit	Q5XML0	Zea m 20S	210	P	NA			Bm1_29265	4e-23	31	LOAG_05258T0	8e-23	31	WUBG_09249T0	3e-07	25	Smp_074500	2e-44	45	psu|PF14_0676	8e-39	39	Tc00.1047053510287.30	3e-31	41	psu|LmjF36.0320	2e-28	35	gb|TGME49_054900	3e-51	49	ECCG_01308T0	0.63	0	gi|16803843	0.87	0	SAAG_01701T0	2.3	0	TBCT_02058.1	6e-05	0	CAWT_04897	7e-39	42	HCAG_04198T0
	AF150	OmpA family	P10324	Hae in P6	153	P	NA			Bm1_27685	6.6	0	LOAG_05610T0	0.83	0	WUBG_06362T0	0.67	0	Smp_163010	20	0	psu|PFD0940w	1.1	0	Tc00.1047053504103.10	0.16	0	psu|LmjF16.0680	0.37	0	gb|TGME49_011020	0.92	0	ECCG_01133T0	5e-44	53	gi|16804480	0.007	0	SAAG_00963T0	2.4	0	TBCT_00888.1	5e-10	34	CAWT_05624	6.5	0	HCAG_06813T0
	AF151	Hydrophobin	Q8NIN9	Cla h HCh1	105	F	no	8	12534552	Bm1_35165	1.4	0	LOAG_04262T0	2.1	0	WUBG_02118T0	1.4	0	Smp_129330	2.4	0	psu|PFD0630c	1	0	Tc00.1047053503905.40	2.4	0	psu|LmjF15.1300	0.12	0	gb|TGME49_043600	0.23	0	ECCG_01268T0	1.1	0	gi|16803991	0.03	0	SAAG_00515T0	0.67	0	TBCT_03752.1	1.2	0	CAWT_00988	0.55	0	HCAG_00594T0
	AF152	Cobalamin-independent methionine synthase	C1KEU0	Sal k 3	757	P	yes	66	20238167	Bm1_57535	0.82	0	LOAG_04983T0	0.078	0	WUBG_01727T0	0.3	0	Smp_132550	35	0	psu|MAL13P1.202	0.96	0	Tc00.1047053507969.10	0.037	0	psu|LmjF31.0010	0	47	gb|TGME49_078800	1.4	0	ECCG_04391T0	0	49	gi|16803721	0	47	SAAG_00844T0	1e-168	45	TBCT_02860.1	0.37	0	CAWT_01512	0	49	HCAG_05565T0
	AF153	Tick histamine binding protein	Q5GQ85	Arg r 1	159	A	yes	100	15753913	Bm1_40270	0.83	0	LOAG_06449T0	0.24	0	WUBG_05350T0	0.05	0	Smp_136410	4.4	0	psu|PF14_0533	0.32	0	Tc00.1047053508273.120	0.13	0	psu|LmjF36.2630	0.3	0	gb|TGME49_085430	2.2	0	ECCG_03157T0	0.9	0	gi|16804596	0.013	0	SAAG_00387T0	0.39	0	TBCT_03149.1	0.72	0	CAWT_01160	0.37	0	HCAG_05920T0
	AF154	Major royal jelly protein	O18330	Api m Apalbumin 1	432	A	yes	100	19287364	Bm1_34760	1.6	0	LOAG_10397T0	2.9	0	WUBG_11706T0	0.36	0	Smp_140960	3.6	0	psu|PFE1260c	0.007	0	Tc00.1047053506791.50	1.8	0	psu|LmjF27.2590	0.47	0	gb|TGME49_026620	0.71	0	ECCG_01125T0	2.1	0	gi|16802866	0.45	0	SAAG_00696T0	1.1	0	TBCT_00293.1	0.44	0	CAWT_05445	0.71	0	HCAG_03764T0
	AF154	Major royal jelly protein	O77061	Api m Apalbumin 2	452	A	yes	100	19287364	Bm1_30535	0.0004	0	LOAG_01799T0	3e-10	40	WUBG_17740T0	3e-07	40	Smp_142250	0.004	0	psu|PFI0470w	2e-10	32	Tc00.1047053508607.10	2e-06	0	psu|LmjF27.2590	0.5	0	gb|TGME49_020280	0.97	0	ECCG_03825T0	1.3	0	gi|16802625	0.007	0	SAAG_01867T0	4e-07	36	TBCT_03149.1	1	0	CAWT_04959	8e-06	0	HCAG_05394T0
	AF155	GILT family	Q7Y1Z2	Tri a 27	203	P	NA		19129651	Bm1_57365	1e-20	30	LOAG_03543T0	4e-20	29	WUBG_01506T0	3e-21	31	Smp_122190	48	0	psu|PFI1210w	4.2	0	Tc00.1047053507641.14	0.8	0	psu|LmjF28.0610	3.1	0	gb|TGME49_061630	1e-15	35	ECCG_01315T0	3	0	gi|16804274	3.2	0	SAAG_00497T0	1.6	0	TBCT_03755.1	0.13	0	CAWT_06093	2.1	0	HCAG_01020T0
	AF156	Group 5/21 mite allergen	A7IZG4	Blo t 21	134	A	yes	93	17445876	Bm1_38610	0.014	0	LOAG_05577T0	0.009	0	WUBG_02409T0	0.027	0	Smp_137670	0.039	0	psu|MAL13P1.96	0.0004	0	Tc00.1047053510687.94	0.031	0	psu|LmjF30.3170	0.019	0	gb|TGME49_115790	0.081	0	ECCG_04021T0	0.29	0	gi|16804261	0.14	0	SAAG_02320T0	0.0008	0	TBCT_01253.1	4.5	0	CAWT_01607	0.018	0	HCAG_05365T0
	AF156	Group 5/21 mite allergen	A7IZE9	Blo t 5	129	A	yes	96	20337963	Bm1_43270	0.14	0	LOAG_05577T0	0.04	0	WUBG_03257T0	0.16	0	Smp_043610	4.3	0	psu|PF13_0120	0.041	0	Tc00.1047053506839.20	0.24	0	psu|LmjF11.1240	0.19	0	gb|TGME49_063060	1.1	0	ECCG_03879T0	0.072	0	gi|16804835	0.06	0	SAAG_00188T0	0.35	0	TBCT_03683.1	4.1	0	CAWT_01607	0.022	0	HCAG_08759T0
	AF156	Group 5/21 mite allergen	B2GM84	Der f 5	136	A	NA			Bm1_51375	0.024	0	LOAG_01040T0	0.0008	0	WUBG_02409T0	0.003	0	Smp_173450	0.27	0	psu|PF11_0207	0.003	0	Tc00.1047053510575.30	0.16	0	psu|LmjF34.4260	0.075	0	gb|TGME49_089100	0.049	0	ECCG_04540T0	0.08	0	gi|16802734	0.19	0	SAAG_00238T0	0.17	0	TBCT_01208.1	3.5	0	CAWT_03212	0.12	0	HCAG_06081T0
	AF156	Group 5/21 mite allergen	Q2L7C5	Der p 21	140	A	no	26	18445190	Bm1_26920	0.045	0	LOAG_05896T0	0.021	0	WUBG_02328T0	0.03	0	Smp_150830	0.002	0	psu|PFA0545c	0.002	0	Tc00.1047053506179.40	0.077	0	psu|LmjF23.1510	0.062	0	gb|TGME49_005080	0.053	0	ECCG_04540T0	0.065	0	gi|16802660	0.054	0	SAAG_01832T0	0.063	0	TBCT_03431.1	3.7	0	CAWT_03615	0.044	0	HCAG_00498T0
	AF156	Group 5/21 mite allergen	P14004	Der p 5	132	A	yes	51	19021722	Bm1_32300	0.088	0	LOAG_00716T0	0.16	0	WUBG_00515T0	0.17	0	Smp_141280	0.42	0	psu|PFB0150c	0.02	0	Tc00.1047053507711.60	0.039	0	psu|LmjF12.0510	0.46	0	gb|TGME49_039050	0.061	0	ECCG_03418T0	0.044	0	gi|16802459	0.14	0	SAAG_02137T0	0.12	0	TBCT_02692.1	2.5	0	CAWT_03516	0.11	0	HCAG_05774T0
	AF156	Group 5/21 mite allergen	Q1M2N1	Lep d 5	171	A	NA		11168362	Bm1_39640	0.05	0	LOAG_02423T0	0.008	0	WUBG_00115T0	0.033	0	Smp_035210	0.36	0	psu|PF11_0207	0.001	0	Tc00.1047053506777.110	0.04	0	psu|LmjF23.1140	0.12	0	gb|TGME49_089540	0.047	0	ECCG_02414T0	0.59	0	gi|16804030	0.075	0	SAAG_00584T0	0.018	0	TBCT_02178.1	1.1	0	CAWT_04855	0.038	0	HCAG_10759T0
[truncated: 8 more columns]
